# Supplementary material for: On-demand utilization of phosphoribosyl pyrophosphate by downstream anabolic pathways
Source: PubMed Central journal article supplement (PMC10413152; doi:10.1016/j.jbc.2023.105011), 2023-07-04
Supplement: mmc1.pdf [file mmc1.pdf]

## Supporting Information

### On demand utilization of phosphoribosyl pyrophosphate by downstream anabolic pathways

Pinson, B., Moenner, M., Saint-Marc, C., Granger-Farbos, A and Daignan-Fornier B.

#### Supplementary Figures

- Figure S1:** Consequences of PRPP variations on mono-, di- and tri-phosphate nucleotide content. **p. 2**
- Figure S2:** Addition of all nucleotide precursors is required to suppress the growth defect of the *prs1 prs3* double mutant. **p. 3**
- Figure S3:** Modulation of PRPP utilization by the pyrimidine *de novo* pathway reveals that PRPP is limiting for nucleotide synthesis. **p. 4**
- Figure S4:** Expression of human *PRPS1* hyperactive variants in HCT116 human cells increases both PRPP and nucleotides content and affects cell proliferation. **p. 5**
- Figure S5:** Determination of biomass production rate in yeast. **p. 6**

#### Supplementary Tables

- Table S1:** List of the *prs1prs3* slow growth phenotype suppressors **p. 7**
- Table S2:** Yeast strains **p. 8**
- Table S3:** Plasmids **p. 9**
- Table S4:** Oligonucleotides **p. 10**
- Table S5:** Raw data for Figure 2: phenotypic and metabolic consequences of PRPP decrease in yeast. **p. 11**
- Table S6:** Raw data for Figure 3: Consequences of PRPP variations on nucleotide synthesis and precursor accumulation. **p. 12-13**
- Table S7:** Raw data for Figure 4: Metabolic and phenotypic consequences of *PRPS1-PRS3* overexpression. **p. 14**
- Table S8:** Raw data for Figure 5: PRPP content is limiting for yeast proliferation and nucleotide synthesis. **p. 15**
- Table S9:** Raw data for Figure 6: Growth and metabolic defects of the *prs1 prs3* mutant are rescued by supplementation with PRPP-not-requiring precursors. **p. 16**
- Table S10:** Raw data for Figure 7: Suppression of *prs1 prs3* growth and metabolic defects by mutations in the *PRS5* gene. **p. 17**
- Table S11:** Raw data for Figure 8: PRPP and nucleotide content is increased by expression of human *PRPS1* hyperactive variants. **p. 18-19**
- Table S12:** Raw data for Figure 9: Impairment of PRPP utilization by the purine *de novo* pathway reveals that PRPP is limiting for nucleotide synthesis. **p. 20**
- Table S13:** Raw data for Figure 10: Expression of human *PRPS1* hyperactive variants in human cells increases PRPP and nucleotide content and affects cell proliferation. **p. 21**
- Table S14:** Raw data for Figure 11: Addition of a purine precursor reveals that PRPP is limiting for synthesis of nucleotides in human cells. **p. 22**
- Table S15:** Raw data for Figure S1: Consequences of PRPP variations on mono-, di- and tri-phosphate nucleotide content. **p. 23-25**
- Table S16:** Raw data for Figure S3: Modulation of PRPP utilization by the pyrimidine *de novo* pathway reveals that PRPP is limiting for nucleotide synthesis. **p. 26**
- Table S17:** Raw data for Figure S4: Expression of human *PRPS1* hyperactive variants in HCT116 human cells increases PRPP and nucleotide content and affects cell proliferation. **p. 27**

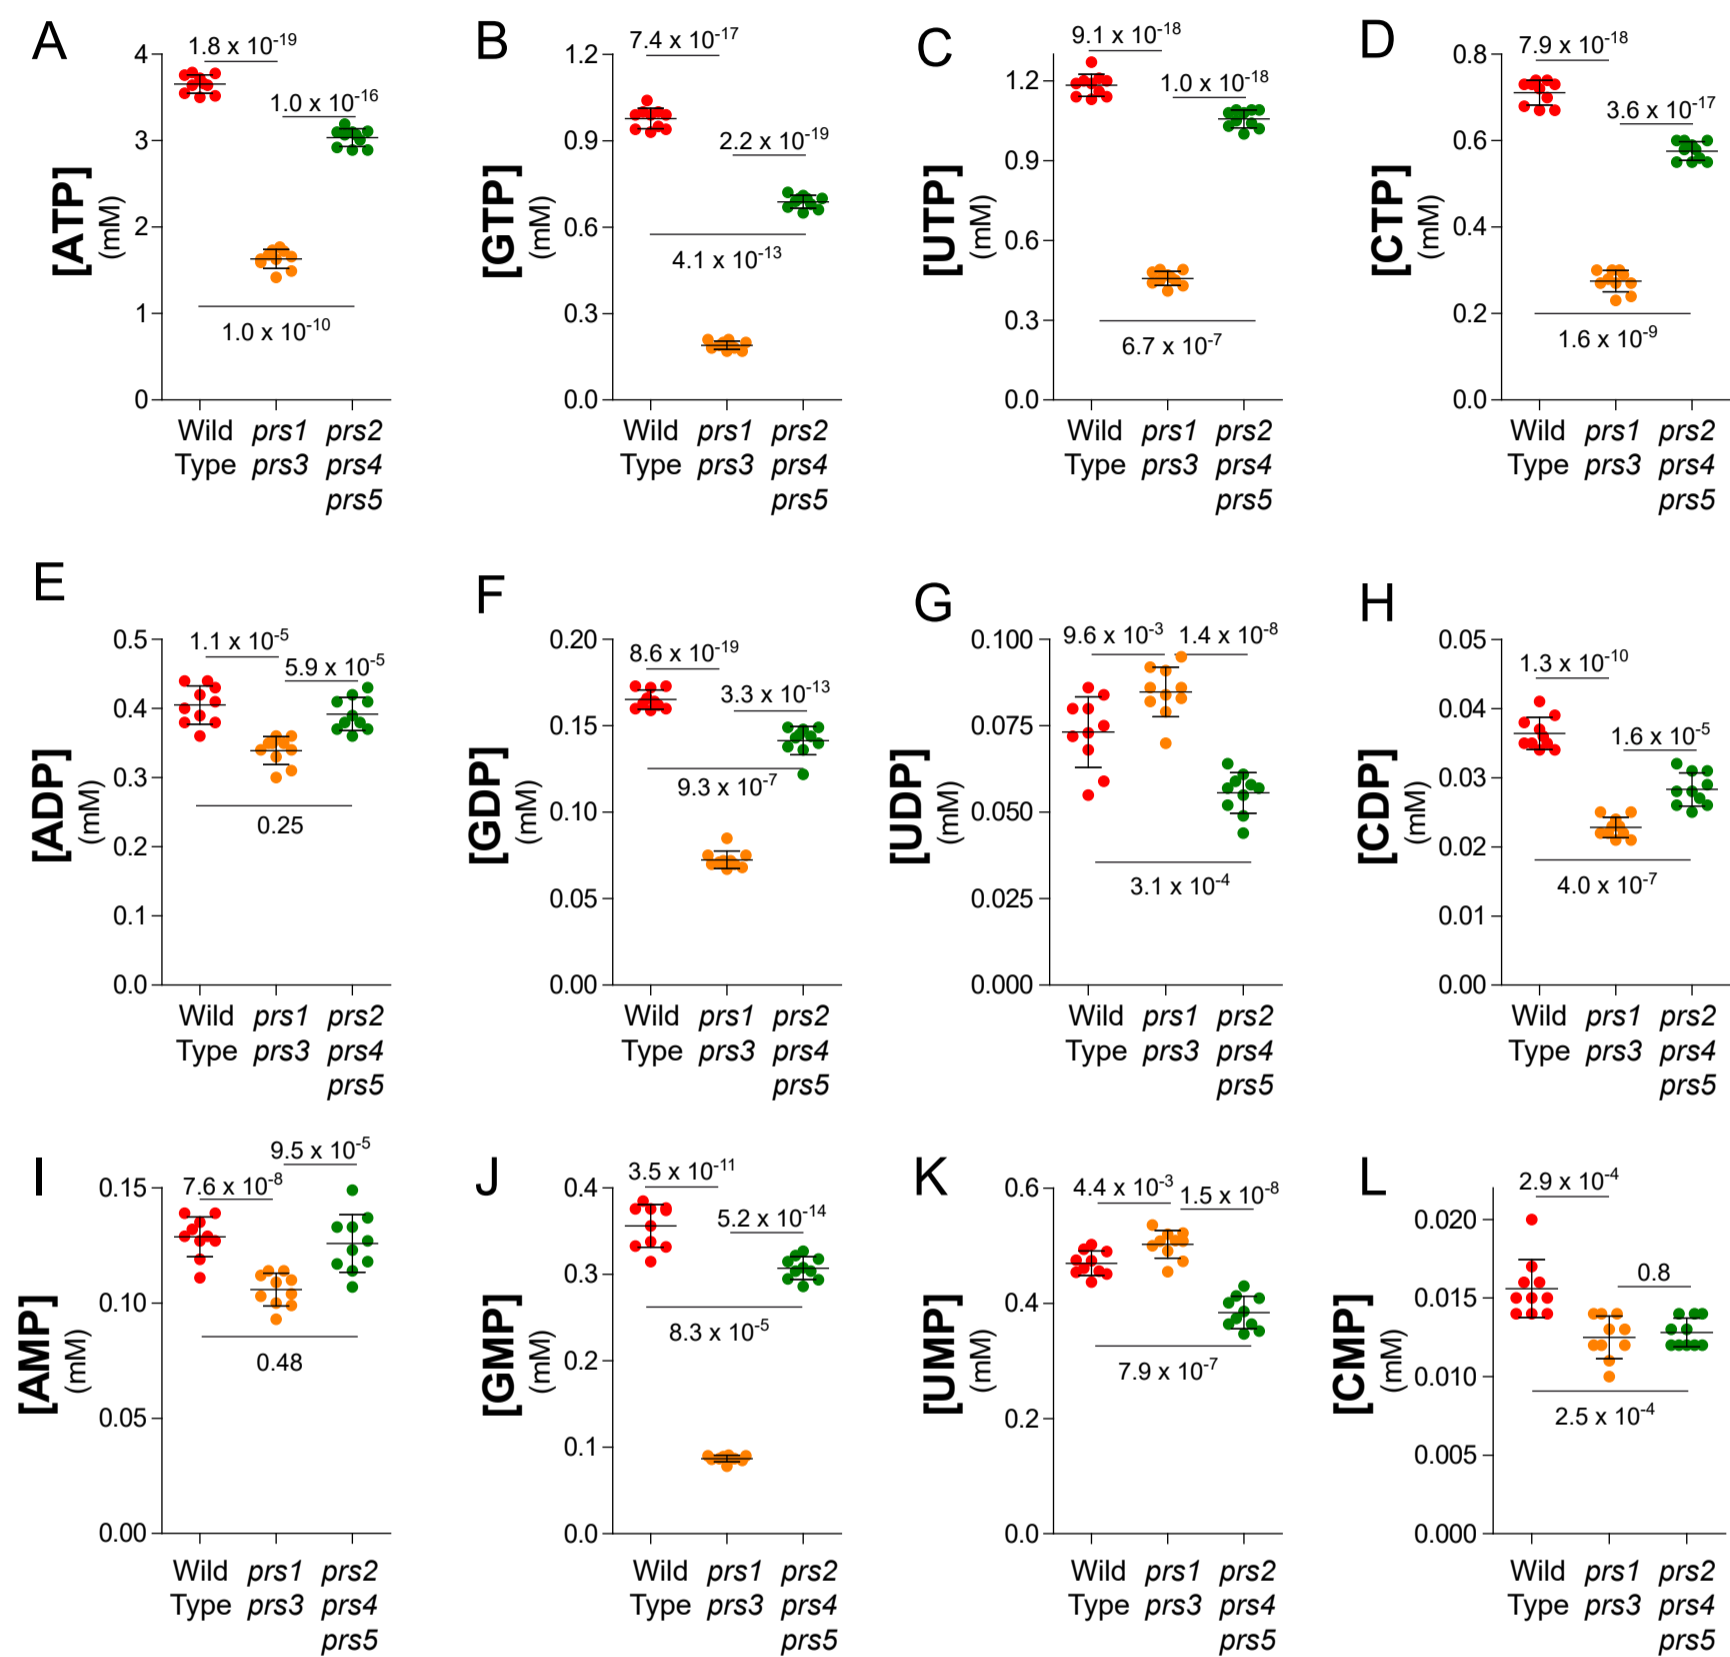

**Figure S1. Consequences of PRPP variations on mono-, di- and tri-phosphate nucleotide content.** Nucleotide content determination on metabolites extractions from Fig. 2 on the wild-type (Y12325), *prs1* $\Delta$ *prs3* $\Delta$  (Y12562) and *prs2* $\Delta$ *prs4* $\Delta$ *prs5* $\Delta$  (Y12649). These mono-, di- and triphosphate nucleotides content determinations were used to calculate the NXP content presented in Fig. 3. Each metabolite was quantified from 8 independent metabolite extractions. Numbers on each panels correspond to p-values calculated from a Welch's unpaired t-test.

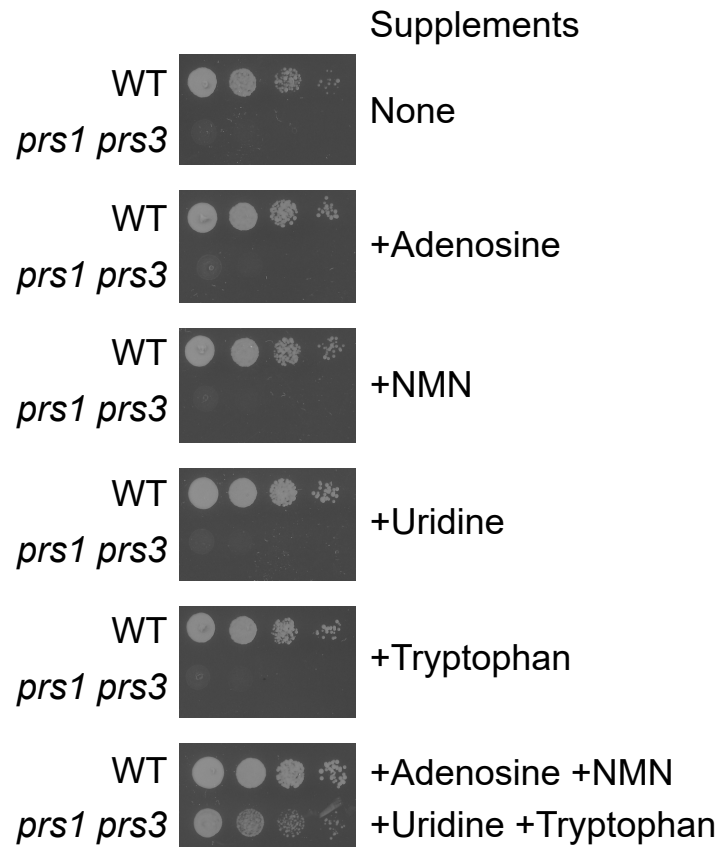

**Figure S2. Addition of all nucleotide precursors is required to suppress the growth defect of *prs1 prs3* double mutant.** Wild-type (Y11418) and *prs1Δ prs3Δ* (Y11985) strains were transformed with the *hENTI* expressing plasmid (p4991). Transformants were selected on SDcasaW medium supplemented with adenosine (Ado, 300 μM), Uridine (Uri, 300 μM), Tryptophan (300 μM) and Nicotinamide mononucleotide (NMN, 100 μM). Transformants were serially diluted (1/10) and spotted on SDcasaW supplemented or not (None) with either Ado, Uri, Trp and NMN or the mix of all precursors. Plates were imaged after 36 h at 30°C.

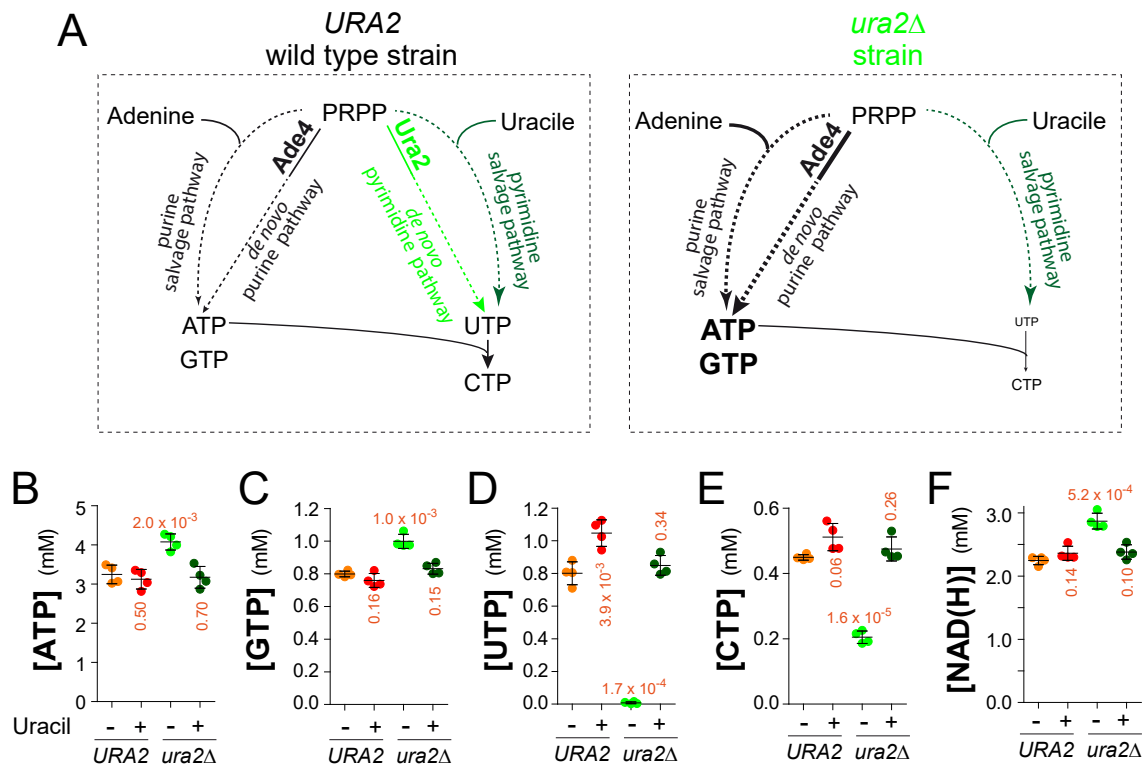

**Figure S3. Modulation of PRPP utilization by the pyrimidine *de novo* pathway reveals that PRPP is limiting for nucleotide synthesis.** *A*, Schematic representation of the *URA2* gene deletion on purine and pyrimidine nucleotides content. Ade4 and Ura2 correspond to the PRPP-dependent enzymes in the *de novo* purine and pyrimidine pathways, respectively. *B-F*, Determination of nucleotides content in yeast cells expressing or not *URA2* gene. Wild-type (FY4) and *ura2Δ* (Y12253) strains were exponentially grown for 24 h in SDcasaWAW liquid medium. Cells were then harvested by filtration and grown for 3 more hours in SDcasaWA liquid medium supplemented (+) or not (-) with uracil before metabolite extraction, separation and quantification. Metabolite measurements were performed on 4 independent extractions and red numbers correspond to the p-values calculated from a Welch's unpaired t-test.

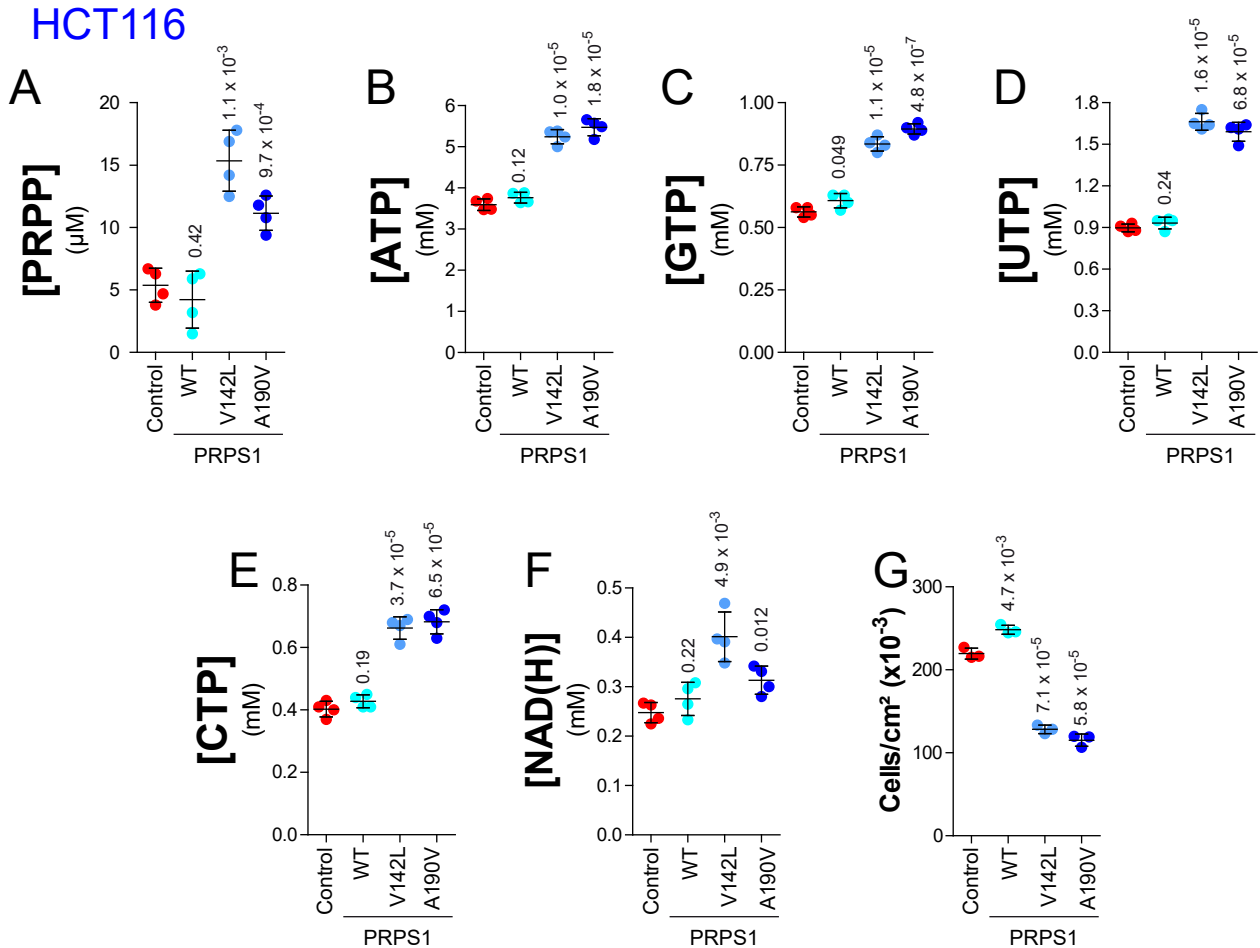

**Figure S4. Expression of human *PRPS1* hyperactive variants in HCT116 human cells increases both PRPP and nucleotide content and affects cell proliferation.** Lentiviral infection was used to express either wild-type human *PRPS1* (WT, p6033) or its hyperactive mutants (V142L, p6034 and A190V, p6035) in the human HCT116 cell line. Infection with the pLenti-MND-IRES-PuroR-WPRE (p5769) empty vector was used as control. Cells were grown in the complete medium. Metabolite content (A-F) was determined as described in “Experimental Procedures” and measurements were performed on 4 independent extractions. In cell proliferation experiments (G), cells were seeded at the density of 7,000 cells/cm<sup>2</sup> and grown for 4 days in complete medium before trypsinization and counting. Measurements were performed on 4 independent extractions and numbers correspond to the p-values calculated from a Welch’s unpaired t-test.

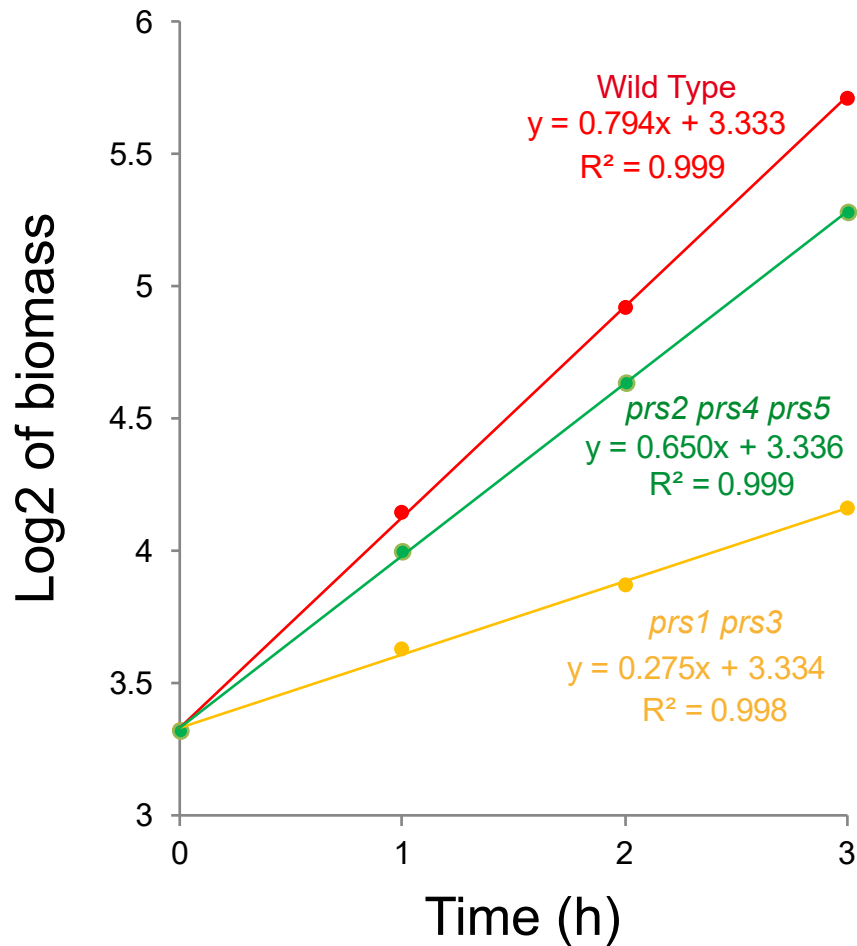

**Figure S5. Determination of biomass production rate in yeast.** Wild-type (Y12325), *prs1*Δ *prs3*Δ (12562) and *prs2*Δ *prs4*Δ *prs5*Δ (12649) were exponentially grown in SDcasaWAU medium for 24 h. Dry biomass was measured during 4 hours as described in “Experimental Procedures”. This figure shows a representative measurement obtain for each strain. Exponential biomass production was determined by linear regression of the experimental points. Relative biomass production presented in Figure 2 corresponds ratio of the slopes obtained for four independent cultures for each strain.

**Table S1:** List of the *prs1prs3* suppressors either obtained on SD minimal medium or on SDcasaWAU rich medium

| <b>Suppressor name</b> | <b>Nucleotide change in <i>PRS5</i></b> | <b>Amino acid change in <i>Prs5</i></b> | <b>Selection Medium</b> |
|------------------------|-----------------------------------------|-----------------------------------------|-------------------------|
| supp48                 | C299T                                   | Pro100Leu                               | SD minimal medium       |
| supp72                 | C298T                                   | Pro100Ser                               | SDcasaWAU               |
| supp44                 | G322A                                   | Gly108Ser                               | SDcasaWAU               |
| supp9                  | C328T                                   | Pro110Ser                               | SDcasaWAU               |
| supp3                  | C328T                                   | Pro110Ser                               | SDcasaWAU               |
| supp23                 | G655A-T656A                             | Val219Lys                               | SD minimal medium       |
| supp16                 | A920T-T921C                             | His307Leu                               | SD minimal medium       |
| supp36                 | A923C                                   | Lys308Thr                               | SDcasaWAU               |
| supp24                 | A922G                                   | Lys308Glu                               | SD minimal medium       |
| supp47                 | A924C                                   | Lys317Asn                               | SD minimal medium       |
| supp48                 | G932T                                   | Arg311Ile                               | SDcasaWAU               |
| supp56                 | G932T                                   | Arg311Ile                               | SDcasaWAU               |
| supp22                 | T934                                    | Ser312Pro                               | SD minimal medium       |
| supp46                 | T941C                                   | Leu314Ser                               | SD minimal medium       |
| supp22                 | A942T                                   | Leu314Phe                               | SDcasaWAU               |
| supp26                 | C953T                                   | Pro318Leu                               | SD minimal medium       |
| supp58                 | G1192A                                  | Asp398Asn                               | SDcasaWAU               |
| supp12                 | G1201A                                  | Asp401Asn                               | SDcasaWAU               |
| supp11                 | G1201A                                  | Asp401Asn                               | SDcasaWAU               |
| supp27                 | G1201A                                  | Asp401Asn                               | SD minimal medium       |
| supp8                  | T1207C                                  | Ser403Pro                               | SDcasaWAU               |
| supp6                  | T1207C                                  | Ser403Pro                               | SDcasaWAU               |
| supp24                 | T1207C                                  | Ser403Pro                               | SDcasaWAU               |
| supp27                 | C1214T                                  | Thr405Ile                               | SDcasaWAU               |
| supp61                 | T1291C                                  | Ser431Pro                               | SDcasaWAU               |
| supp34                 | T1291C                                  | Ser431Pro                               | SD minimal medium       |
| supp32                 | A1490G-G1491T                           | End497Cys                               | SD minimal medium       |
| supp33                 | A1490G-G1491T                           | End497Cys                               | SD minimal medium       |
| supp38                 | A1490G-G1491T                           | End497Cys                               | SD minimal medium       |
| supp39                 | A1490G-G1491T                           | End497Cys                               | SD minimal medium       |

**Table S2: Yeast strains**

| <b>Strain Name</b> | <b>Genotype</b>                                                                                                  |
|--------------------|------------------------------------------------------------------------------------------------------------------|
| BY4741             | <i>MAT a ura3Δ0 leu2Δ0 his3Δ1 met15Δ0</i>                                                                        |
| BY4742             | <i>MAT alpha ura3Δ0 leu2Δ0 his3Δ1 lys2Δ0</i>                                                                     |
| FY4                | <i>MAT a</i>                                                                                                     |
| FY5                | <i>MAT alpha</i>                                                                                                 |
| Y2850              | <i>MAT a prs1::KanMX4 prs3::KanMX4 ura3Δ0 leu2Δ0 his3Δ1 met15Δ0</i>                                              |
| Y5217              | <i>MAT a/ Mat alpha rki1::kanMX4/RKI1 ura3Δ0/ ura3Δ0 leu2Δ0/ leu2Δ0 his3Δ1/ his3Δ1 lys2Δ0/LYS2 met15Δ0/MET15</i> |
| Y9469              | <i>pYPPhENT1 fui1::TRP1 gal, ura3-52, trp1, lys2, ade2,hisΔ2000</i>                                              |
| Y11418             | <i>MAT alpha ura3Δ0</i>                                                                                          |
| Y11451             | <i>MAT alpha ura3Δ0 leu2Δ0</i>                                                                                   |
| Y11983             | <i>MAT a ura3Δ0 prs1::KanMX4 prs3::KanMX4</i>                                                                    |
| Y11985             | <i>MAT alpha ura3Δ0 prs1::KanMX4 prs3::KanMX4</i>                                                                |
| Y12149             | <i>MAT alpha prs1::KanMX4 prs3::KanMX4</i>                                                                       |
| Y12204             | <i>MAT a prs1::KanMX4 prs3::KanMX4 PRS5supp44 (G322A : Gly108Ser)</i>                                            |
| Y12206             | <i>MAT a prs1::KanMX4 prs3::KanMX4 PRS5supp58 (G1192A : Asp398Asn)</i>                                           |
| Y12207             | <i>MAT a prs1::KanMX4 prs3::KanMX4 PRS5supp61 (T1291C : Ser431Pro)</i>                                           |
| Y12211             | <i>MAT alpha prs1::KanMX4 prs3::KanMX4 PRS5supp29 (C1369T : Pro457Ser)</i>                                       |
| Y12214             | <i>MAT a prs1::KanMX4 prs3::KanMX4 PRS5supp3 (C328T : Pro110Ser)</i>                                             |
| Y12253             | <i>MAT alpha ura2 ::KanMX4 ura3Δ0</i>                                                                            |
| Y12258             | <i>MAT alpha ade4 ::KanMX4</i>                                                                                   |
| Y12269             | <i>MAT a prs1::KanMX4 prs3::KanMX4 PRS5supp72 (C298T : Pro100Ser)</i>                                            |
| Y12271             | <i>MAT alpha prs1::KanMX4 prs3::KanMX4 PRS5supp48 (G932T : Arg311Ile)</i>                                        |
| Y12272             | <i>MAT a prs1::KanMX4 prs3::KanMX4 PRS5supp11 (G1201A : Asp401Asn)</i>                                           |
| Y12325             | <i>MAT a</i>                                                                                                     |
| Y12469             | <i>MAT a prs2::KanMX4 prs4::KanMX4 prs5::KanMX4</i>                                                              |
| Y12558             | <i>MAT a prs1::KanMX4 prs3::KanMX4 PRS5supp23 (G665A T656A : Val219Lys)</i>                                      |
| Y12560             | <i>MAT alpha prs1::KanMX4 prs3::KanMX4 PRS5supp46 (T941C : Leu314Ser)</i>                                        |
| Y12562             | <i>MAT a prs1::KanMX4 prs3::KanMX4</i>                                                                           |
| Y12563             | <i>MAT a prs1::KanMX4 prs3::KanMX4</i>                                                                           |
| Y12599             | <i>MAT a ura3Δ0</i>                                                                                              |



### Table S3: Plasmids

| Plasmid Name | Relevant description                                   | Source            |
|--------------|--------------------------------------------------------|-------------------|
| pCM189       | <i>tetO7-promoterURA3 CEN AmpR</i>                     | Gari <i>et al</i> |
| YCpLac33     | <i>URA3 CEN AmpR</i>                                   | Gietz and Sugino  |
| YEpLac181    | <i>LEU2 2μ AmpR</i>                                    | Gietz and Sugino  |
| YEPlac195    | <i>URA3 2μ AmpR</i>                                    | Gietz and Sugino  |
| P2048        | <i>tetO7-promoter-ADE4-1(Arg328Lys) URA3 CEN AmpR</i>  | This study        |
| P2714        | <i>tetO7-promoter-HA URA3 CEN AmpR</i>                 | This study        |
| P4991        | <i>hENT1 URA3 2μ</i>                                   | This study        |
| P5671        | <i>PRS3</i> in YEPlac195                               | This study        |
| P5769        | <i>pLenti-MND-IRES-PuroR-WPRE</i>                      | Vect'UB           |
| P5909        | <i>tetO7-promoter-PrsA URA3 CEN AmpR</i>               | This study        |
| P5949        | <i>tetO7-promoter-HA-PRPS1 URA3 CEN AmpR</i>           | This study        |
| P5994        | <i>tetO7-promoter-HA-PRPS1 Val142Leu URA3 CEN AmpR</i> | This study        |
| P5995        | <i>tetO7-promoter-HA-PRPS1 Ala190Val URA3 CEN AmpR</i> | This study        |
| P6001        | <i>tetO7-promoter-PRPS1 URA3 CEN AmpR</i>              | This study        |
| P6008        | <i>PRS5supp11</i> (D401N) in YEPlac195                 | This study        |
| P6009        | <i>PRS5supp11</i> (D401N) in YCpLac33                  | This study        |
| P6011        | <i>PRS5supp48</i> (R311I) in YEPlac195                 | This study        |
| P6014        | <i>PRS5supp48</i> (R311I) in YCpLac33                  | This study        |
| P6015        | <i>PRS5supp3</i> (P110S) in YEPlac195                  | This study        |
| P6016        | <i>PRS5supp3</i> (P110S) in YCpLac33                   | This study        |
| P6017        | <i>PRPS5</i> in YCpLac33                               | This study        |
| P6019        | <i>PRPS5</i> in YEPlac195                              | This study        |
| P6020        | <i>tetO7-promoter-PRPS2 URA3 CEN AmpR</i>              | This study        |
| P6030        | <i>PRPS2</i> in P5769                                  | This study        |
| P6033        | <i>PRPS1</i> in P5769                                  | This study        |
| P6034        | <i>PRPS1</i> Val142Leu in P5769                        | This study        |
| P6035        | <i>PRPS1</i> Ala190Val in P5769                        | This study        |
| P6070        | <i>PRS2</i> in YEpLac181                               | This study        |
| P6094        | <i>PRS4</i> in YEpLac181                               | This study        |
| P6160        | <i>PRS1</i> in YEpLac181                               | This study        |

E Garí, L Piedrafita, M Aldea and E Herrero A set of vectors with a tetracycline-regulatable promoter system for modulated gene expression in *Saccharomyces cerevisiae*. (1997) *Yeast* . **13**(9):837-48. doi: 10.1002/(SICI)1097-0061(199707)13:9<837::AID-YEA145>3.0.CO;2-T.

R D Gietz, A Sugino New yeast-*Escherichia coli* shuttle vectors constructed with *in vitro* mutagenized yeast genes lacking six-base pair restriction sites. (1988) *Gene* **74**(2):527-34. doi: 10.1016/0378-1119(88)90185-0

Vect'UB: Vectorology and virus production platform from TBMCORE Bordeaux University, CNRS UAR 3427, INSERM US005

**Table S4: Oligonucleotides**

| <b>Oligonucleotide</b> | <b>5'- 3' Sequence</b>                |
|------------------------|---------------------------------------|
| 48                     | CGCGGATCCAAATGTGTGGTATTTTAG           |
| 429                    | AAACTGCAGTCGATAATGTGCACAATTATATAATC   |
| 2032                   | TCTTTGGAAGAAGTTGAAGG                  |
| 2033                   | GATCGAATTCGGATGTTGTAATGTGTTTGG        |
| 2040                   | CGCGGATCCTTATATCCAGCATCTCATGC         |
| 2041                   | GATCGGTACCCCAACGGCTCCTCGTCGACC        |
| 2278                   | CTCAATGCGGCCGCTTAGTGTTTCGAACATGGCAG   |
| 2279                   | CGCGGATCCAAGATGCCTGATATGAAGCTTTTTGC   |
| 5082                   | CGCGGATCCGGCCAGAAATCTAAGCTTGAGG       |
| 5083                   | AAACTGCAGGTTCCCGATGGCTCTATTTTGG       |
| 5562                   | CGCGGATCCAGGATGCCGAATATCAAAATCTTCAG   |
| 5563                   | CCAATGCATCTATTATAAAGGGACATGGCTGAATAGG |
| 5678                   | CGCGGATCCATGCCGAATATCAAAATCTTCAGC     |
| 5763                   | GCCGGATCCACGCGTATGCCCAACATCGTGCTGTTC  |
| 5764                   | GGCCATATGATGCATTTATAGCGGGACATGGCTGAAC |
| 5847                   | GCGGGATCCTTGCAATTTGCGAATGCGG          |
| 5848                   | AAACTGCAGCATATTTTCCAAAAGCAAGGGCG      |
| 5849                   | GCGGGATCCGTACTGTAAAATGTGTCGTCGAC      |
| 5850                   | AAACTGCAGGTAAAGGTTACCGTCTCCT          |

## Table S5: Raw data Figure 2

### A: [PRPP]

|                                    | CD        | CD               | CD                    |                        |                        |                        |
|------------------------------------|-----------|------------------|-----------------------|------------------------|------------------------|------------------------|
|                                    | Peak area | Peak area        | Peak area             | $\mu\text{M}$ in cells | $\mu\text{M}$ in cells | $\mu\text{M}$ in cells |
| Metabolite                         | PRPP      | PRPP             | PRPP                  | PRPP                   | PRPP                   | PRPP                   |
| Strain                             | WT        | <i>prs1 prs3</i> | <i>prs2 prs4 prs5</i> | WT                     | <i>prs1 prs3</i>       | <i>prs2 prs4 prs5</i>  |
| sample 1                           | 0,030     | 0,004            | 0,025                 | 0,100                  | 0,013                  | 0,083                  |
| sample 2                           | 0,031     | 0,003            | 0,024                 | 0,103                  | 0,010                  | 0,080                  |
| sample 3                           | 0,036     | 0,005            | 0,025                 | 0,119                  | 0,016                  | 0,083                  |
| sample 4                           | 0,034     | 0,005            | 0,021                 | 0,115                  | 0,015                  | 0,071                  |
| sample 5                           | 0,035     | 0,004            | 0,020                 | 0,116                  | 0,014                  | 0,067                  |
| sample 6                           | 0,033     | 0,006            | 0,022                 | 0,111                  | 0,019                  | 0,073                  |
| sample 7                           | 0,038     | 0,004            | 0,021                 | 0,128                  | 0,014                  | 0,071                  |
| sample 8                           | 0,034     | 0,004            | 0,024                 | 0,113                  | 0,014                  | 0,082                  |
| sample 9                           | 0,034     | 0,004            | 0,020                 | 0,112                  | 0,013                  | 0,066                  |
| sample 10                          | 0,034     | 0,004            | 0,022                 | 0,113                  | 0,014                  | 0,072                  |
| Mean                               | 0,034     | 0,004            | 0,022                 | 0,113                  | 0,014                  | 0,075                  |
| SD                                 | 0,002     | 0,001            | 0,002                 | 0,008                  | 0,002                  | 0,007                  |
| Unpaired t-test vsWT               |           | 8,1E-13          | 8,4E-10               |                        | 8,1E-13                | 8,4E-10                |
| Unpaired t-test vs <i>prs1prs3</i> | 8,1E-13   |                  | 9,1E-12               | 8,1E-13                |                        | 9,1E-12                |

### B: Adenylic nucleotides content: [AXP] = [ATP] + [ADP] + [AMP]

|                                    | mM in cells | mM in cells      | mM in cells           |
|------------------------------------|-------------|------------------|-----------------------|
| Metabolite                         | AXP         | AXP              | AXP                   |
| Strain                             | WT          | <i>prs1 prs3</i> | <i>prs2 prs4 prs5</i> |
| sample 1                           | 4,08        | 1,90             | 3,40                  |
| sample 2                           | 4,01        | 1,82             | 3,40                  |
| sample 3                           | 4,02        | 2,06             | 3,70                  |
| sample 4                           | 4,14        | 2,12             | 3,38                  |
| sample 5                           | 4,26        | 2,18             | 3,65                  |
| sample 6                           | 4,21        | 2,06             | 3,62                  |
| sample 7                           | 4,33        | 2,20             | 3,57                  |
| sample 8                           | 4,36        | 2,09             | 3,59                  |
| sample 9                           | 4,34        | 2,22             | 3,66                  |
| sample 10                          | 4,19        | 2,14             | 3,55                  |
| Mean                               | 4,19        | 2,08             | 3,55                  |
| SD                                 | 0,13        | 0,13             | 0,12                  |
| Unpaired t-test vsWT               |             | 2,2E-18          | 1,1E-09               |
| Unpaired t-test vs <i>prs1prs3</i> | 2,2E-18     |                  | 7,2E-16               |

### C: Relative biomass production rate

|                                    | Relative Biomass Production | Relative Biomass Production | Relative Biomass Production |
|------------------------------------|-----------------------------|-----------------------------|-----------------------------|
|                                    | WT                          | <i>prs1 prs3</i>            | <i>prs2 prs4 prs5</i>       |
| sample 1                           | 1,023                       | 0,609                       | 0,848                       |
| sample 2                           | 1,026                       | 0,641                       | 0,816                       |
| sample 3                           | 0,960                       | 0,624                       | 0,800                       |
| sample 4                           | 0,990                       | 0,634                       | 0,827                       |
| sample 5                           |                             |                             | 0,831                       |
| Unpaired t-test vsWT               |                             | 2,1E-05                     | 2,9E-04                     |
| Unpaired t-test vs <i>prs1prs3</i> | 2,1E-05                     |                             | 3,2E-07                     |

### D: Median volume

|                                    | Median volume (fl) | Median volume (fl) | Median volume (fl)    |
|------------------------------------|--------------------|--------------------|-----------------------|
|                                    | WT                 | <i>prs1 prs3</i>   | <i>prs2 prs4 prs5</i> |
| sample 1                           | 53,8               | 40                 | 51,5                  |
| sample 2                           | 53,4               | 41                 | 51,3                  |
| sample 3                           | 54,1               | 40,5               | 52,1                  |
| sample 4                           | 55,8               | 41,1               | 52                    |
| sample 5                           | 53,3               | 38,8               | 50,4                  |
| sample 6                           | 53,9               | 39,7               | 50                    |
| sample 7                           | 55,3               | 38,9               | 50                    |
| sample 8                           | 54,2               | 39,02              | 51,6                  |
| sample 9                           | 55                 | 36,9               | 50,6                  |
| sample 10                          | 56                 | 38,1               | 50,6                  |
| Mean                               | 54,5               | 39,4               | 51,0                  |
| SD                                 | 1,0                | 1,3                | 0,8                   |
| Unpaired t-test vsWT               |                    | 1,3E-15            | 9,5E-08               |
| Unpaired t-test vs <i>prs1prs3</i> | 1,3E-15            |                    | 4,0E-13               |

### E: Population doubling Time

|                                    | Doubling Time (min) | Doubling Time (min) | Doubling Time (min)   |
|------------------------------------|---------------------|---------------------|-----------------------|
|                                    | WT                  | <i>prs1 prs3</i>    | <i>prs2 prs4 prs5</i> |
| sample 1                           | 78,5                | 235,2               | 85,1                  |
| sample 2                           | 79,6                | 215,7               | 83,3                  |
| sample 3                           | 84,4                | 210,6               | 76,3                  |
| sample 4                           | 77,0                | 218,8               | 79,4                  |
| Unpaired t-test vsWT               |                     | 4,1E-05             | 0,67                  |
| Unpaired t-test vs <i>prs1prs3</i> | 4,1E-05             |                     | 2,4E-05               |

## Table S6: Raw data Figure 3 (part 1/2)

**A: [GXP] in mM** **[GXP]= [GTP] + [GDP] + [GMP]**

| Metabolite                          | $\mu\text{M}$ in extract | $\mu\text{M}$ in extract | $\mu\text{M}$ in extract | mM in cells | mM in cells      | mM in cells           |
|-------------------------------------|--------------------------|--------------------------|--------------------------|-------------|------------------|-----------------------|
| Strain                              | GXP                      | GXP                      | GXP                      | GXP         | GXP              | GXP                   |
|                                     | WT                       | <i>prs1 prs3</i>         | <i>prs2 prs4 prs5</i>    | WT          | <i>prs1 prs3</i> | <i>prs2 prs4 prs5</i> |
| sample 1                            | 49,47                    | 10,89                    | 37,27                    | 1,48        | 0,33             | 1,12                  |
| sample 2                            | 49,51                    | 10,73                    | 36,93                    | 1,49        | 0,32             | 1,11                  |
| sample 3                            | 47,31                    | 11,17                    | 39,49                    | 1,42        | 0,34             | 1,18                  |
| sample 4                            | 47,93                    | 11,82                    | 35,70                    | 1,44        | 0,35             | 1,07                  |
| sample 5                            | 51,17                    | 11,36                    | 39,17                    | 1,54        | 0,34             | 1,18                  |
| sample 6                            | 50,75                    | 11,30                    | 38,34                    | 1,52        | 0,34             | 1,15                  |
| sample 7                            | 51,10                    | 12,81                    | 37,60                    | 1,53        | 0,38             | 1,13                  |
| sample 8                            | 49,83                    | 12,41                    | 37,93                    | 1,50        | 0,37             | 1,14                  |
| sample 9                            | 51,45                    | 12,09                    | 38,92                    | 1,54        | 0,36             | 1,17                  |
| sample 10                           | 50,13                    | 11,97                    | 37,97                    | 1,50        | 0,36             | 1,14                  |
| Mean                                | 49,865                   | 11,657                   | 37,931                   | 1,50        | 0,35             | 1,14                  |
| SD                                  | 1,380                    | 0,677                    | 1,137                    | 0,04        | 0,02             | 0,03                  |
| Unpaired t-test vs WT               |                          | 6,6E-19                  | 8,0E-14                  |             | 6,6E-19          | 8,0E-14               |
| Unpaired t-test vs <i>prs1 prs3</i> | 6,6E-19                  |                          | 3,0E-19                  | 6,6E-19     |                  | 3,0E-19               |

**B: [UXP] in mM** **[UXP]= [UTP] + [UDP] + [UMP]**

| Metabolite                          | $\mu\text{M}$ in extract | $\mu\text{M}$ in extract | $\mu\text{M}$ in extract | mM in cells | mM in cells      | mM in cells           |
|-------------------------------------|--------------------------|--------------------------|--------------------------|-------------|------------------|-----------------------|
| Strain                              | UXP                      | UXP                      | UXP                      | UXP         | UXP              | UXP                   |
|                                     | WT                       | <i>prs1 prs3</i>         | <i>prs2 prs4 prs5</i>    | WT          | <i>prs1 prs3</i> | <i>prs2 prs4 prs5</i> |
| sample 1                            | 56,040                   | 32,973                   | 48,196                   | 1,681       | 0,989            | 1,446                 |
| sample 2                            | 55,197                   | 32,181                   | 49,817                   | 1,656       | 0,965            | 1,495                 |
| sample 3                            | 54,798                   | 33,728                   | 52,625                   | 1,644       | 1,012            | 1,579                 |
| sample 4                            | 57,683                   | 35,312                   | 47,454                   | 1,730       | 1,059            | 1,424                 |
| sample 5                            | 58,523                   | 35,217                   | 51,373                   | 1,756       | 1,057            | 1,541                 |
| sample 6                            | 58,443                   | 34,272                   | 49,669                   | 1,753       | 1,028            | 1,490                 |
| sample 7                            | 60,400                   | 36,739                   | 50,148                   | 1,812       | 1,102            | 1,504                 |
| sample 8                            | 56,683                   | 35,184                   | 50,153                   | 1,700       | 1,056            | 1,505                 |
| sample 9                            | 59,199                   | 37,132                   | 50,857                   | 1,776       | 1,114            | 1,526                 |
| sample 10                           | 58,292                   | 35,478                   | 48,329                   | 1,749       | 1,064            | 1,450                 |
| Mean                                | 57,526                   | 34,822                   | 49,862                   | 1,73        | 1,04             | 1,50                  |
| SD                                  | 1,804                    | 1,559                    | 1,565                    | 0,05        | 0,05             | 0,05                  |
| Unpaired t-test vs WT               |                          | 1,3E-16                  | 8,6E-09                  |             | 1,3E-16          | 8,6E-09               |
| Unpaired t-test vs <i>prs1 prs3</i> | 1,3E-16                  |                          | 2,7E-14                  | 1,3E-16     |                  | 2,7E-14               |

**C: [CXP] in mM** **[CXP]= [CTP] + [CDP] + [CMP]**

| Metabolite                          | $\mu\text{M}$ in extract | $\mu\text{M}$ in extract | $\mu\text{M}$ in extract | mM in cells | mM in cells      | mM in cells           |
|-------------------------------------|--------------------------|--------------------------|--------------------------|-------------|------------------|-----------------------|
| Strain                              | CXP                      | CXP                      | CXP                      | CXP         | CXP              | CXP                   |
|                                     | WT                       | <i>prs1 prs3</i>         | <i>prs2 prs4 prs5</i>    | WT          | <i>prs1 prs3</i> | <i>prs2 prs4 prs5</i> |
| sample 1                            | 24,212                   | 9,268                    | 19,723                   | 0,726       | 0,278            | 0,592                 |
| sample 2                            | 24,354                   | 9,000                    | 19,873                   | 0,731       | 0,270            | 0,596                 |
| sample 3                            | 23,919                   | 9,949                    | 21,362                   | 0,718       | 0,298            | 0,641                 |
| sample 4                            | 26,286                   | 11,194                   | 21,187                   | 0,789       | 0,336            | 0,636                 |
| sample 5                            | 26,182                   | 10,262                   | 21,354                   | 0,785       | 0,308            | 0,641                 |
| sample 6                            | 25,569                   | 10,136                   | 20,033                   | 0,767       | 0,304            | 0,601                 |
| sample 7                            | 26,416                   | 11,044                   | 20,666                   | 0,792       | 0,331            | 0,620                 |
| sample 8                            | 25,329                   | 10,340                   | 20,680                   | 0,760       | 0,310            | 0,620                 |
| sample 9                            | 26,152                   | 11,146                   | 21,103                   | 0,785       | 0,334            | 0,633                 |
| sample 10                           | 26,135                   | 10,696                   | 19,788                   | 0,784       | 0,321            | 0,594                 |
| Mean                                | 25,455                   | 10,304                   | 20,577                   | 0,76        | 0,31             | 0,62                  |
| SD                                  | 0,957                    | 0,755                    | 0,669                    | 0,03        | 0,02             | 0,02                  |
| Unpaired t-test vs WT               |                          | 3,4E-18                  | 4,6E-10                  |             | 3,4E-18          | 4,6E-10               |
| Unpaired t-test vs <i>prs1 prs3</i> | 3,4E-18                  |                          | 3,4E-17                  | 3,4E-18     |                  | 3,4E-17               |

**D: [NAD(H)] in mM** **[NAD(H)]= [NAD<sup>+</sup>] + [NADH]**

| Metabolite                          | $\mu\text{M}$ in extracts | $\mu\text{M}$ in extracts | $\mu\text{M}$ in extracts | mM in cells | mM in cells      | mM in cells           |
|-------------------------------------|---------------------------|---------------------------|---------------------------|-------------|------------------|-----------------------|
| Strain                              | NAD(H)                    | NAD(H)                    | NAD(H)                    | NAD(H)      | NAD(H)           | NAD(H)                |
|                                     | WT                        | <i>prs1 prs3</i>          | <i>prs2 prs4 prs5</i>     | WT          | <i>prs1 prs3</i> | <i>prs2 prs4 prs5</i> |
| sample 1                            | 65,569                    | 25,579                    | 58,267                    | 1,967       | 0,767            | 1,748                 |
| sample 2                            | 64,564                    | 23,622                    | 59,418                    | 1,937       | 0,709            | 1,783                 |
| sample 3                            | 63,677                    | 26,726                    | 67,591                    | 1,910       | 0,802            | 2,028                 |
| sample 4                            | 68,003                    | 30,409                    | 60,689                    | 2,040       | 0,912            | 1,821                 |
| sample 5                            | 72,037                    | 32,555                    | 61,811                    | 2,161       | 0,977            | 1,854                 |
| sample 6                            | 65,645                    | 30,129                    | 63,264                    | 1,969       | 0,904            | 1,898                 |
| sample 7                            | 70,663                    | 34,888                    | 62,450                    | 2,120       | 1,047            | 1,873                 |
| sample 8                            | 67,335                    | 32,168                    | 60,773                    | 2,020       | 0,965            | 1,823                 |
| sample 9                            | 65,470                    | 36,792                    | 63,601                    | 1,964       | 1,104            | 1,908                 |
| sample 10                           | 68,388                    | 36,886                    | 60,739                    | 2,052       | 1,107            | 1,822                 |
| Mean                                | 67,135                    | 30,975                    | 61,861                    | 2,01        | 0,93             | 1,86                  |
| SD                                  | 2,684                     | 4,598                     | 2,601                     | 0,08        | 0,14             | 0,08                  |
| Unpaired t-test vs WT               |                           | 2,1E-12                   | 3,0E-04                   |             | 2,1E-12          | 3,0E-04               |
| Unpaired t-test vs <i>prs1 prs3</i> | 2,1E-12                   |                           | 2,4E-11                   | 2,1E-12     |                  | 2,4E-11               |

**E: [Uracil] in mM**

| Metabolite                          | $\mu\text{M}$ in extracts | $\mu\text{M}$ in extracts | $\mu\text{M}$ in extracts | mM in cells | mM in cells      | mM in cells           |
|-------------------------------------|---------------------------|---------------------------|---------------------------|-------------|------------------|-----------------------|
| Strain                              | Uracil                    | Uracil                    | Uracil                    | Uracil      | Uracil           | Uracil                |
|                                     | WT                        | <i>prs1 prs3</i>          | <i>prs2 prs4 prs5</i>     | WT          | <i>prs1 prs3</i> | <i>prs2 prs4 prs5</i> |
| sample 1                            | 8,148                     | 25,407                    | 15,385                    | 0,244       | 0,762            | 0,462                 |
| sample 2                            | 8,148                     | 22,481                    | 14,944                    | 0,244       | 0,674            | 0,448                 |
| sample 3                            | 8,185                     | 24,093                    | 17,470                    | 0,246       | 0,723            | 0,524                 |
| sample 4                            | 8,576                     | 26,156                    | 15,495                    | 0,257       | 0,785            | 0,465                 |
| sample 5                            | 8,900                     | 25,828                    | 17,319                    | 0,267       | 0,775            | 0,520                 |
| sample 6                            | 10,226                    | 24,568                    | 16,080                    | 0,307       | 0,737            | 0,482                 |
| sample 7                            | 7,037                     | 25,132                    | 15,565                    | 0,211       | 0,754            | 0,467                 |
| sample 8                            | 8,137                     | 24,253                    | 14,857                    | 0,244       | 0,728            | 0,446                 |
| sample 9                            | 7,893                     | 29,397                    | 16,402                    | 0,237       | 0,882            | 0,492                 |
| sample 10                           | 8,574                     | 24,532                    | 14,260                    | 0,257       | 0,736            | 0,428                 |
| Mean                                | 8,383                     | 25,185                    | 15,778                    | 0,25        | 0,76             | 0,47                  |
| SD                                  | 0,817                     | 1,805                     | 1,046                     | 0,02        | 0,05             | 0,03                  |
| Unpaired t-test vs WT               |                           | 1,9E-12                   | 2,3E-12                   |             | 1,9E-12          | 2,3E-12               |
| Unpaired t-test vs <i>prs1 prs3</i> | 1,9E-12                   |                           | 6,7E-10                   | 1,9E-12     |                  | 6,7E-10               |

**Table S6: Raw data Figure 3 (part 2/2)**

**F: [Adenine]in mM**

| Metabolite                          | $\mu\text{M}$ in extracts | $\mu\text{M}$ in extracts | $\mu\text{M}$ in extracts | mM in cells | mM in cells      | mM in cells           |
|-------------------------------------|---------------------------|---------------------------|---------------------------|-------------|------------------|-----------------------|
| Strain                              | Adenine                   | Adenine                   | Adenine                   | Adenine     | Adenine          | Adenine               |
|                                     | WT                        | <i>prs1 prs3</i>          | <i>prs2 prs4 prs5</i>     | WT          | <i>prs1 prs3</i> | <i>prs2 prs4 prs5</i> |
| sample 1                            | 1,172                     | 5,325                     | 1,169                     | 0,035       | 0,160            | 0,035                 |
| sample 2                            | 2,272                     | 3,059                     | 1,384                     | 0,068       | 0,092            | 0,042                 |
| sample 3                            | 1,602                     | 2,185                     | 1,189                     | 0,048       | 0,066            | 0,036                 |
| sample 4                            | 1,123                     | 4,156                     | 1,267                     | 0,034       | 0,125            | 0,038                 |
| sample 5                            | 1,405                     | 3,635                     | 1,026                     | 0,042       | 0,109            | 0,031                 |
| sample 6                            | 2,092                     | 2,999                     | 0,844                     | 0,063       | 0,090            | 0,025                 |
| sample 7                            | 1,534                     | 3,920                     | 1,622                     | 0,046       | 0,118            | 0,049                 |
| sample 8                            | 2,334                     | 3,391                     | 2,461                     | 0,070       | 0,102            | 0,074                 |
| sample 9                            | 2,131                     | 5,116                     | 2,343                     | 0,064       | 0,153            | 0,070                 |
| sample 10                           | 2,501                     | 4,636                     | 1,450                     | 0,075       | 0,139            | 0,043                 |
| Mean                                | 1,817                     | 3,842                     | 1,476                     | 0,05        | 0,12             | 0,04                  |
| SD                                  | 0,507                     | 0,993                     | 0,535                     | 0,02        | 0,03             | 0,02                  |
| Unpaired t-test vs WT               |                           | 6,0E-05                   | 1,6E-01                   |             | 6,0E-05          | 0,16                  |
| Unpaired t-test vs <i>prs1 prs3</i> | 6,0E-05                   |                           | 1,2E-05                   | 6,0E-05     |                  | 1,2E-05               |

**G: [Hypoxanthine] in mM**

| Metabolite                          | $\mu\text{M}$ in extracts | $\mu\text{M}$ in extracts | $\mu\text{M}$ in extracts | mM in cells  | mM in cells      | mM in cells           |
|-------------------------------------|---------------------------|---------------------------|---------------------------|--------------|------------------|-----------------------|
| Strain                              | Hypoxanthine              | Hypoxanthine              | Hypoxanthine              | Hypoxanthine | Hypoxanthine     | Hypoxanthine          |
|                                     | WT                        | <i>prs1 prs3</i>          | <i>prs2 prs4 prs5</i>     | WT           | <i>prs1 prs3</i> | <i>prs2 prs4 prs5</i> |
| sample 1                            | 18,085                    | 41,274                    | 15,389                    | 0,543        | 1,238            | 0,462                 |
| sample 2                            | 17,604                    | 41,718                    | 15,674                    | 0,528        | 1,252            | 0,470                 |
| sample 3                            | 17,005                    | 40,155                    | 13,765                    | 0,510        | 1,205            | 0,413                 |
| sample 4                            | 17,273                    | 40,680                    | 16,997                    | 0,518        | 1,220            | 0,510                 |
| sample 5                            | 17,411                    | 42,033                    | 17,643                    | 0,522        | 1,261            | 0,529                 |
| sample 6                            | 17,315                    | 40,724                    | 14,890                    | 0,519        | 1,222            | 0,447                 |
| sample 7                            | 16,266                    | 43,120                    | 14,311                    | 0,488        | 1,294            | 0,429                 |
| sample 8                            | 16,103                    | 40,569                    | 14,498                    | 0,483        | 1,217            | 0,435                 |
| sample 9                            | 17,841                    | 39,830                    | 16,133                    | 0,535        | 1,195            | 0,484                 |
| sample 10                           | 17,137                    | 40,368                    | 15,575                    | 0,514        | 1,211            | 0,467                 |
| Mean                                | 17,204                    | 41,047                    | 15,487                    | 0,52         | 1,23             | 0,46                  |
| SD                                  | 0,627                     | 0,999                     | 1,206                     | 0,02         | 0,03             | 0,04                  |
| Unpaired t-test vs WT               |                           | 7,7E-20                   | 1,4E-03                   |              | 7,7E-20          | 1,4E-03               |
| Unpaired t-test vs <i>prs1 prs3</i> | 7,7E-20                   |                           | 1,8E-20                   | 7,7E-20      |                  | 1,8E-20               |

## Table S7: Raw data Figure 4

### A: [PRPP] in mM

|                 | Peak area  | Peak area      | mM         | mM             |
|-----------------|------------|----------------|------------|----------------|
| Metabolite      | PRPP       | PRPP           | PRPP       | PRPP           |
| Strain          | WT/vectors | WT/PRS1 + PRS3 | WT/vectors | WT/PRS1 + PRS3 |
| sample 1        | 0.014      | 0.024          | 0.074      | 0.129          |
| sample 2        | 0.015      | 0.029          | 0.079      | 0.154          |
| sample 3        | 0.017      | 0.028          | 0.088      | 0.147          |
| sample 4        | 0.015      | 0.025          | 0.079      | 0.134          |
| sample 5        | 0.014      | 0.025          | 0.077      | 0.132          |
| sample 6        | 0.012      | 0.026          | 0.065      | 0.137          |
| sample 7        | 0.016      | 0.025          | 0.085      | 0.133          |
| sample 8        | 0.015      | 0.024          | 0.079      | 0.127          |
| Mean            | 0.015      | 0.026          | 0.007      | 0.137          |
| SD              | 0.001      | 0.002          | 0.008      | 0.009          |
| Unpaired t-test | 2,4E-09    |                | 2,4E-09    |                |

### B: [ATP] in mM

|                 | Peak area  | Peak area      | mM         | mM             |
|-----------------|------------|----------------|------------|----------------|
| Metabolite      | ATP        | ATP            | ATP        | ATP            |
| Strain          | WT/vectors | WT/PRS1 + PRS3 | WT/vectors | WT/PRS1 + PRS3 |
| sample 1        | 17.96      | 19.84          | 3.52       | 3.89           |
| sample 2        | 16.45      | 21.93          | 3.23       | 4.30           |
| sample 3        | 17.44      | 21.29          | 3.42       | 4.17           |
| sample 4        | 17.43      | 21.38          | 3.42       | 4.19           |
| sample 5        | 17.68      | 20.64          | 3.47       | 4.05           |
| sample 6        | 16.97      | 21.08          | 3.33       | 4.13           |
| sample 7        | 17.21      | 20.78          | 3.38       | 4.08           |
| sample 8        | 18.13      | 21.68          | 3.55       | 4.25           |
| Mean            | 17.41      | 21.08          | 3.41       | 4.13           |
| SD              | 0.54       | 0.66           | 0.11       | 0.13           |
| Unpaired t-test | 1,1E-08    |                | 1,1E-08    |                |

### C: [GTP] in mM

|                 | Peak area  | Peak area      | mM         | mM             |
|-----------------|------------|----------------|------------|----------------|
| Metabolite      | GTP        | GTP            | GTP        | GTP            |
| Strain          | WT/vectors | WT/PRS1 + PRS3 | WT/vectors | WT/PRS1 + PRS3 |
| sample 1        | 3.09       | 3.51           | 0.82       | 0.94           |
| sample 2        | 2.70       | 3.91           | 0.72       | 1.04           |
| sample 3        | 3.00       | 3.86           | 0.80       | 1.03           |
| sample 4        | 2.95       | 3.93           | 0.78       | 1.05           |
| sample 5        | 3.02       | 3.81           | 0.80       | 1.02           |
| sample 6        | 2.95       | 3.81           | 0.79       | 1.01           |
| sample 7        | 2.92       | 3.77           | 0.78       | 1.00           |
| sample 8        | 3.13       | 3.94           | 0.83       | 1.05           |
| Mean            | 2.97       | 3.82           | 0.79       | 1.02           |
| SD              | 0.13       | 0.14           | 0.04       | 0.04           |
| Unpaired t-test | 5,7E-09    |                | 5,7E-09    |                |

### D: [UTP] in mM

|                 | Peak area  | Peak area      | mM         | mM             |
|-----------------|------------|----------------|------------|----------------|
| Metabolite      | UTP        | UTP            | UTP        | UTP            |
| Strain          | WT/vectors | WT/PRS1 + PRS3 | WT/vectors | WT/PRS1 + PRS3 |
| sample 1        | 2.11       | 2.42           | 0.85       | 0.98           |
| sample 2        | 1.78       | 2.58           | 0.72       | 1.04           |
| sample 3        | 1.93       | 2.52           | 0.78       | 1.02           |
| sample 4        | 1.81       | 2.63           | 0.73       | 1.06           |
| sample 5        | 2.11       | 2.51           | 0.85       | 1.01           |
| sample 6        | 1.82       | 2.74           | 0.74       | 1.11           |
| sample 7        | 1.85       | 2.48           | 0.75       | 1.00           |
| sample 8        | 1.96       | 2.55           | 0.79       | 1.03           |
| Mean            | 1.92       | 2.55           | 0.78       | 1.03           |
| SD              | 0.13       | 0.10           | 0.05       | 0.04           |
| Unpaired t-test | 6,8E-08    |                | 6,8E-08    |                |

### E: [CTP] in mM

|                 | Peak area  | Peak area      | mM         | mM             |
|-----------------|------------|----------------|------------|----------------|
| Metabolite      | CTP        | CTP            | CTP        | CTP            |
| Strain          | WT/vectors | WT/PRS1 + PRS3 | WT/vectors | WT/PRS1 + PRS3 |
| sample 1        | 2.08       | 2.31           | 0.93       | 1.03           |
| sample 2        | 1.92       | 2.58           | 0.86       | 1.16           |
| sample 3        | 1.97       | 2.49           | 0.88       | 1.12           |
| sample 4        | 2.03       | 2.49           | 0.91       | 1.12           |
| sample 5        | 2.08       | 2.42           | 0.93       | 1.08           |
| sample 6        | 1.98       | 2.45           | 0.89       | 1.10           |
| sample 7        | 1.99       | 2.45           | 0.89       | 1.10           |
| sample 8        | 2.08       | 2.55           | 0.93       | 1.14           |
| Mean            | 2.02       | 2.47           | 0.91       | 1.11           |
| SD              | 0.06       | 0.09           | 0.03       | 0.04           |
| Unpaired t-test | 2,4E-08    |                | 2,4E-08    |                |

### F: [NAD(H)] in mM

|                 | $\mu\text{M}$ in sample | $\mu\text{M}$ in sample | mM         | mM             |
|-----------------|-------------------------|-------------------------|------------|----------------|
| Metabolite      | NAD(H)                  | NAD(H)                  | NAD(H)     | NAD(H)         |
| Strain          | WT/vectors              | WT/PRS1 + PRS3          | WT/vectors | WT/PRS1 + PRS3 |
| sample 1        | 45.31                   | 51.44                   | 1.81       | 2.06           |
| sample 2        | 45.80                   | 57.23                   | 1.83       | 2.29           |
| sample 3        | 47.71                   | 56.28                   | 1.91       | 2.25           |
| sample 4        | 49.40                   | 57.54                   | 1.98       | 2.30           |
| sample 5        | 49.89                   | 55.49                   | 2.00       | 2.22           |
| sample 6        | 50.85                   | 59.97                   | 2.03       | 2.40           |
| sample 7        | 50.31                   | 58.10                   | 2.01       | 2.32           |
| sample 8        | 51.96                   | 61.24                   | 2.08       | 2.45           |
| Mean            | 48.90                   | 57.16                   | 1.96       | 2.29           |
| SD              | 2.40                    | 2.97                    | 0.10       | 0.12           |
| Unpaired t-test | 3,2E-05                 |                         | 3,2E-05    |                |

### G: [IMP] in mM

|                 | Peak area  | Peak area      | mM         | mM             |
|-----------------|------------|----------------|------------|----------------|
| Metabolite      | IMP        | IMP            | IMP        | IMP            |
| Strain          | WT/vectors | WT/PRS1 + PRS3 | WT/vectors | WT/PRS1 + PRS3 |
| sample 1        | 0.09       | 0.29           | 0.05       | 0.17           |
| sample 2        | 0.06       | 0.34           | 0.04       | 0.20           |
| sample 3        | 0.05       | 0.26           | 0.03       | 0.15           |
| sample 4        | 0.05       | 0.26           | 0.03       | 0.15           |
| sample 5        | 0.06       | 0.26           | 0.03       | 0.15           |
| sample 6        | 0.04       | 0.30           | 0.03       | 0.18           |
| sample 7        | 0.04       | 0.27           | 0.02       | 0.16           |
| sample 8        | 0.04       | 0.29           | 0.02       | 0.17           |
| Mean            | 0.05       | 0.28           | 0.03       | 0.17           |
| SD              | 0.02       | 0.03           | 0.01       | 0.02           |
| Unpaired t-test | 7,1E-10    |                | 7,1E-10    |                |

### H: [Inosine] in mM

|                 | Peak area  | Peak area      | mM         | mM             |
|-----------------|------------|----------------|------------|----------------|
| Metabolite      | Inosine    | Inosine        | Inosine    | Inosine        |
| Strain          | WT/vectors | WT/PRS1 + PRS3 | WT/vectors | WT/PRS1 + PRS3 |
| sample 1        | 0.79       | 5.83           | 0.20       | 1.51           |
| sample 2        | 0.83       | 7.04           | 0.21       | 1.82           |
| sample 3        | 0.83       | 5.94           | 0.21       | 1.54           |
| sample 4        | 0.93       | 6.16           | 0.24       | 1.60           |
| sample 5        | 0.75       | 5.83           | 0.19       | 1.51           |
| sample 6        | 0.75       | 6.83           | 0.19       | 1.77           |
| sample 7        | 0.82       | 5.99           | 0.21       | 1.55           |
| sample 8        | 1.04       | 6.34           | 0.27       | 1.64           |
| Mean            | 0.84       | 6.25           | 0.22       | 1.62           |
| SD              | 0.10       | 0.46           | 0.03       | 0.12           |
| Unpaired t-test | 1,9E-09    |                | 1,9E-09    |                |

### I: Population doubling Time (min)

|                 | Doubling Time (min) | Doubling Time (min) |
|-----------------|---------------------|---------------------|
|                 | WT/vectors          | WT/PRS1 + PRS3      |
| sample 1        | 106.3               | 120.5               |
| sample 2        | 107.1               | 117.0               |
| sample 3        | 111.7               | 114.3               |
| sample 4        | 106.8               | 116.5               |
| Mean            | 108.0               | 117.1               |
| SD              | 2.5                 | 2.6                 |
| Unpaired t-test | 2,3E-03             |                     |

### J: Relative biomass production

|                 | Relative biomass production rate | Relative biomass production rate |
|-----------------|----------------------------------|----------------------------------|
|                 | WT/vectors                       | WT/PRS1 + PRS3                   |
| sample 1        | 0.998                            | 0.922                            |
| sample 2        | 1.017                            | 0.941                            |
| sample 3        | 0.998                            | 0.941                            |
| sample 4        | 0.988                            | 0.941                            |
| Mean            | 1.000                            | 0.936                            |
| SD              | 0.012                            | 0.010                            |
| Unpaired t-test | 2,0E-04                          |                                  |

### K: Median volume (fl)

|                 | Median Volume (fl) | Median Volume (fl) |
|-----------------|--------------------|--------------------|
|                 | WT/vectors         | WT/PRS1 + PRS3     |
| sample 1        | 48.2               | 52.1               |
| sample 2        | 49.5               | 50.1               |
| sample 3        | 50.4               | 53.2               |
| sample 4        | 48.2               | 50.9               |
| sample 5        | 51.4               | 49.6               |
| sample 6        | 51.1               | 50.5               |
| sample 7        | 50.3               | 52.6               |
| sample 8        | 48.5               | 49.1               |
| Mean            | 49.7               | 51.0               |
| SD              | 1.3                | 1.5                |
| Unpaired t-test | 7,9E-02            |                    |

## Table S8: Raw data Figure 5

### B: Population doubling Time (min)

|                                      | Doubling Time (min) | Doubling Time (min)      | Doubling Time (min)     | Doubling Time (min)     | Doubling Time (min)    |
|--------------------------------------|---------------------|--------------------------|-------------------------|-------------------------|------------------------|
|                                      | WT/vector           | <i>prst1 prs3/vector</i> | <i>prst1 prs3/PRPS1</i> | <i>prst1 prs3/PRPS2</i> | <i>prst1 prs3/PrsA</i> |
| Strain 1                             | 100.5               | 405.1                    | 95.4                    | 101.3                   | 99.6                   |
| Strain 2                             | 96.1                | 335.6                    | 103.8                   | 106.6                   | 121.4                  |
| Strain 3                             | 92.3                | 357.5                    | 101.2                   | 101.6                   | 107.9                  |
| Strain 4                             | 96.3                | 355.3                    | 99.6                    | 103.8                   | 110.1                  |
| Strain 5                             | 93.7                | 398.7                    |                         |                         |                        |
| Unpaired t-test vs <i>prst1 prs3</i> | 2.9E-05             |                          | 2.9E-05                 | 3.4E-05                 | 1.1E-05                |

### C: [PRPP] in mM

|                                      | Peak area | Peak area                | Peak area               | Peak area               | Peak area              | mM        | mM                       | mM                      | mM                      | mM                     |
|--------------------------------------|-----------|--------------------------|-------------------------|-------------------------|------------------------|-----------|--------------------------|-------------------------|-------------------------|------------------------|
| Metabolite                           | PRPP      | PRPP                     | PRPP                    | PRPP                    | PRPP                   | in cells  | in cells                 | in cells                | in cells                | in cells               |
| Strain                               | WT/vector | <i>prst1 prs3/vector</i> | <i>prst1 prs3/PRPS1</i> | <i>prst1 prs3/PRPS2</i> | <i>prst1 prs3/PrsA</i> | WT/vector | <i>prst1 prs3/vector</i> | <i>prst1 prs3/PRPS1</i> | <i>prst1 prs3/PRPS2</i> | <i>prst1 prs3/PrsA</i> |
| sample 1                             | 0.034     | 0.004                    | 0.017                   | 0.016                   | 0.012                  | 0.14      | 0.02                     | 0.07                    | 0.06                    | 0.05                   |
| sample 2                             | 0.031     | 0.006                    | 0.015                   | 0.015                   | 0.013                  | 0.12      | 0.02                     | 0.06                    | 0.06                    | 0.05                   |
| sample 3                             | 0.033     | 0.007                    | 0.016                   | 0.017                   | 0.013                  | 0.13      | 0.03                     | 0.06                    | 0.07                    | 0.05                   |
| sample 4                             | 0.033     | 0.006                    | 0.019                   | 0.013                   | 0.011                  | 0.13      | 0.02                     | 0.08                    | 0.05                    | 0.04                   |
| sample 5                             | 0.036     | 0.010                    | 0.017                   | 0.015                   | 0.015                  | 0.14      | 0.04                     | 0.07                    | 0.06                    | 0.06                   |
| sample 6                             | 0.032     | 0.006                    | 0.016                   | 0.015                   | 0.015                  | 0.13      | 0.02                     | 0.06                    | 0.06                    | 0.06                   |
| Mean                                 | 0.03      | 0.01                     | 0.02                    | 0.02                    | 0.01                   | 0.13      | 0.03                     | 0.07                    | 0.06                    | 0.05                   |
| SD                                   | 0.00      | 0.00                     | 0.00                    | 0.00                    | 0.00                   | 0.01      | 0.01                     | 0.01                    | 0.01                    | 0.01                   |
| Unpaired t-test vs <i>prst1 prs3</i> | 3.3E-10   |                          | 2.9E-06                 | 1.1E-05                 | 9.2E-05                | 3.3E-10   |                          | 2.9E-06                 | 1.1E-05                 | 9.2E-05                |

### D: [ATP] in mM

|                                      | Peak area | Peak area                | Peak area               | Peak area               | Peak area              | mM        | mM                       | mM                      | mM                      | mM                     |
|--------------------------------------|-----------|--------------------------|-------------------------|-------------------------|------------------------|-----------|--------------------------|-------------------------|-------------------------|------------------------|
| Metabolite                           | ATP       | ATP                      | ATP                     | ATP                     | ATP                    | in cells  | in cells                 | in cells                | in cells                | in cells               |
| Strain                               | WT/vector | <i>prst1 prs3/vector</i> | <i>prst1 prs3/PRPS1</i> | <i>prst1 prs3/PRPS2</i> | <i>prst1 prs3/PrsA</i> | WT/vector | <i>prst1 prs3/vector</i> | <i>prst1 prs3/PRPS1</i> | <i>prst1 prs3/PRPS2</i> | <i>prst1 prs3/PrsA</i> |
| sample 1                             | 22.82     | 11.32                    | 14.98                   | 16.46                   | 14.61                  | 3.36      | 1.66                     | 2.20                    | 2.42                    | 2.15                   |
| sample 2                             | 21.79     | 10.26                    | 13.41                   | 14.53                   | 14.19                  | 3.20      | 1.51                     | 1.97                    | 2.14                    | 2.09                   |
| sample 3                             | 22.07     | 11.85                    | 15.09                   | 15.30                   | 14.20                  | 3.25      | 1.74                     | 2.22                    | 2.25                    | 2.09                   |
| sample 4                             | 22.25     | 10.30                    | 13.27                   | 15.00                   | 14.63                  | 3.27      | 1.51                     | 1.95                    | 2.21                    | 2.15                   |
| sample 5                             | 23.05     | 10.89                    | 14.02                   | 15.64                   | 14.99                  | 3.39      | 1.60                     | 2.06                    | 2.30                    | 2.20                   |
| sample 6                             | 23.98     | 9.89                     | 13.75                   | 15.42                   | 15.34                  | 3.53      | 1.45                     | 2.02                    | 2.27                    | 2.26                   |
| Mean                                 | 22.66     | 10.75                    | 14.09                   | 15.39                   | 14.66                  | 3.33      | 1.58                     | 2.07                    | 2.26                    | 2.16                   |
| SD                                   | 0.80      | 0.74                     | 0.79                    | 0.65                    | 0.45                   | 0.12      | 0.11                     | 0.11                    | 0.10                    | 0.07                   |
| Unpaired t-test vs <i>prst1 prs3</i> | 1.3E-10   |                          | 1.9E-05                 | 4.9E-07                 | 3.1E-06                | 1.3E-10   |                          | 1.9E-05                 | 4.9E-07                 | 3.1E-06                |

### E: [GTP] in mM

|                                      | Peak area | Peak area                | Peak area               | Peak area               | Peak area              | mM       | mM                | mM                      | mM                      | mM                     |
|--------------------------------------|-----------|--------------------------|-------------------------|-------------------------|------------------------|----------|-------------------|-------------------------|-------------------------|------------------------|
| Metabolite                           | GTP       | GTP                      | GTP                     | GTP                     | GTP                    | in cells | in cells          | in cells                | in cells                | in cells               |
| Strain                               | WT/vector | <i>prst1 prs3/vector</i> | <i>prst1 prs3/PRPS1</i> | <i>prst1 prs3/PRPS2</i> | <i>prst1 prs3/PrsA</i> | WT       | <i>prst1 prs3</i> | <i>prst1 prs3/PRPS1</i> | <i>prst1 prs3/PRPS2</i> | <i>prst1 prs3/PrsA</i> |
| sample 1                             | 4.74      | 0.89                     | 2.04                    | 2.25                    | 1.67                   | 0.95     | 0.18              | 0.41                    | 0.45                    | 0.33                   |
| sample 2                             | 4.44      | 0.81                     | 1.81                    | 1.82                    | 1.68                   | 0.89     | 0.16              | 0.36                    | 0.36                    | 0.34                   |
| sample 3                             | 4.40      | 0.93                     | 2.02                    | 2.10                    | 1.63                   | 0.88     | 0.19              | 0.40                    | 0.42                    | 0.33                   |
| sample 4                             | 4.35      | 0.80                     | 1.88                    | 1.81                    | 1.69                   | 0.87     | 0.16              | 0.40                    | 0.36                    | 0.34                   |
| sample 5                             | 4.63      | 0.85                     | 1.78                    | 2.02                    | 1.83                   | 0.92     | 0.17              | 0.38                    | 0.40                    | 0.37                   |
| sample 6                             | 4.58      | 0.82                     | 1.79                    | 1.95                    | 1.89                   | 0.91     | 0.16              | 0.38                    | 0.39                    | 0.38                   |
| Mean                                 | 4.52      | 0.85                     | 1.90                    | 1.99                    | 1.73                   | 0.90     | 0.17              | 0.38                    | 0.40                    | 0.35                   |
| SD                                   | 0.15      | 0.05                     | 0.12                    | 0.17                    | 0.10                   | 0.03     | 0.01              | 0.02                    | 0.03                    | 0.02                   |
| Unpaired t-test vs <i>prst1 prs3</i> | 1.6E-09   |                          | 4.0E-07                 | 4.9E-06                 | 2.1E-07                | 1.6E-09  |                   | 4.0E-07                 | 4.9E-06                 | 2.1E-07                |

### E: [UTP] in mM

|                                      | Peak area | Peak area                | Peak area               | Peak area               | Peak area              | mM        | mM                       | mM                      | mM                      | mM                     |
|--------------------------------------|-----------|--------------------------|-------------------------|-------------------------|------------------------|-----------|--------------------------|-------------------------|-------------------------|------------------------|
| Metabolite                           | UTP       | UTP                      | UTP                     | UTP                     | UTP                    | in cells  | in cells                 | in cells                | in cells                | in cells               |
| Strain                               | WT/vector | <i>prst1 prs3/vector</i> | <i>prst1 prs3/PRPS1</i> | <i>prst1 prs3/PRPS2</i> | <i>prst1 prs3/PrsA</i> | WT/vector | <i>prst1 prs3/vector</i> | <i>prst1 prs3/PRPS1</i> | <i>prst1 prs3/PRPS2</i> | <i>prst1 prs3/PrsA</i> |
| sample 1                             | 2.61      | 1.23                     | 1.35                    | 1.57                    | 1.28                   | 0.79      | 0.37                     | 0.41                    | 0.48                    | 0.39                   |
| sample 2                             | 2.65      | 1.22                     | 1.28                    | 1.28                    | 1.18                   | 0.80      | 0.37                     | 0.39                    | 0.39                    | 0.36                   |
| sample 3                             | 2.49      | 1.34                     | 1.40                    | 1.52                    | 1.07                   | 0.75      | 0.41                     | 0.42                    | 0.46                    | 0.32                   |
| sample 4                             | 2.39      | 1.23                     | 1.43                    | 1.24                    | 1.14                   | 0.72      | 0.37                     | 0.43                    | 0.38                    | 0.35                   |
| sample 5                             | 2.68      | 1.15                     | 1.25                    | 1.38                    | 1.26                   | 0.81      | 0.35                     | 0.38                    | 0.42                    | 0.38                   |
| sample 6                             | 2.55      | 1.13                     | 1.26                    | 1.31                    | 1.33                   | 0.77      | 0.34                     | 0.38                    | 0.40                    | 0.40                   |
| Mean                                 | 2.56      | 1.22                     | 1.32                    | 1.38                    | 1.21                   | 0.78      | 0.37                     | 0.40                    | 0.42                    | 0.37                   |
| SD                                   | 0.11      | 0.07                     | 0.08                    | 0.13                    | 0.10                   | 0.03      | 0.02                     | 0.02                    | 0.04                    | 0.03                   |
| Unpaired t-test vs <i>prst1 prs3</i> | 1.6E-09   |                          | 0.03                    | 0.03                    | 0.90                   | 1.6E-09   |                          | 0.03                    | 0.03                    | 0.90                   |

### E: [CTP] in mM

|                                      | Peak area | Peak area                | Peak area               | Peak area               | Peak area              | mM        | mM                       | mM                      | mM                      | mM                     |
|--------------------------------------|-----------|--------------------------|-------------------------|-------------------------|------------------------|-----------|--------------------------|-------------------------|-------------------------|------------------------|
| Metabolite                           | CTP       | CTP                      | CTP                     | CTP                     | CTP                    | in cells  | in cells                 | in cells                | in cells                | in cells               |
| Strain                               | WT/vector | <i>prst1 prs3/vector</i> | <i>prst1 prs3/PRPS1</i> | <i>prst1 prs3/PRPS2</i> | <i>prst1 prs3/PrsA</i> | WT/vector | <i>prst1 prs3/vector</i> | <i>prst1 prs3/PRPS1</i> | <i>prst1 prs3/PRPS2</i> | <i>prst1 prs3/PrsA</i> |
| sample 1                             | 1.51      | 0.73                     | 0.85                    | 0.93                    | 0.81                   | 0.51      | 0.25                     | 0.29                    | 0.31                    | 0.27                   |
| sample 2                             | 1.45      | 0.72                     | 0.76                    | 0.82                    | 0.76                   | 0.49      | 0.24                     | 0.26                    | 0.28                    | 0.26                   |
| sample 3                             | 1.47      | 0.78                     | 0.89                    | 0.88                    | 0.82                   | 0.49      | 0.26                     | 0.30                    | 0.30                    | 0.28                   |
| sample 4                             | 1.49      | 0.75                     | 0.78                    | 0.89                    | 0.78                   | 0.50      | 0.25                     | 0.26                    | 0.30                    | 0.26                   |
| sample 5                             | 1.53      | 0.74                     | 0.80                    | 0.89                    | 0.84                   | 0.52      | 0.25                     | 0.27                    | 0.30                    | 0.28                   |
| sample 6                             | 1.59      | 0.70                     | 0.81                    | 0.89                    | 0.86                   | 0.53      | 0.24                     | 0.27                    | 0.30                    | 0.29                   |
| Mean                                 | 1.51      | 0.74                     | 0.81                    | 0.89                    | 0.81                   | 0.51      | 0.25                     | 0.27                    | 0.30                    | 0.27                   |
| SD                                   | 0.05      | 0.03                     | 0.05                    | 0.03                    | 0.04                   | 0.02      | 0.01                     | 0.02                    | 0.01                    | 0.01                   |
| Unpaired t-test vs <i>prst1 prs3</i> | 1.3E-09   |                          | 8.6E-03                 | 1.1E-05                 | 3.1E-03                | 1.3E-09   |                          | 8.6E-03                 | 1.1E-05                 | 3.1E-03                |

### H: [NAD<sup>+</sup> + [NADH] in mM

|                                      | $\mu\text{M}$ in sample | $\mu\text{M}$ in sample  | $\mu\text{M}$ in sample | $\mu\text{M}$ in sample | $\mu\text{M}$ in sample | mM        | mM                       | mM                      | mM                      | mM                     |
|--------------------------------------|-------------------------|--------------------------|-------------------------|-------------------------|-------------------------|-----------|--------------------------|-------------------------|-------------------------|------------------------|
| Metabolite                           | NAD(H)                  | NAD(H)                   | NAD(H)                  | NAD(H)                  | NAD(H)                  | in cells  | in cells                 | in cells                | in cells                | in cells               |
| Strain                               | WT/vector               | <i>prst1 prs3/vector</i> | <i>prst1 prs3/PRPS1</i> | <i>prst1 prs3/PRPS2</i> | <i>prst1 prs3/PrsA</i>  | WT/vector | <i>prst1 prs3/vector</i> | <i>prst1 prs3/PRPS1</i> | <i>prst1 prs3/PRPS2</i> | <i>prst1 prs3/PrsA</i> |
| sample 1                             | 46.28                   | 20.05                    | 27.82                   | 33.60                   | 29.32                   | 1.39      | 0.60                     | 0.83                    | 1.01                    | 0.88                   |
| sample 2                             | 46.33                   | 20.33                    | 29.81                   | 30.55                   | 31.08                   | 1.39      | 0.61                     | 0.89                    | 0.92                    | 0.93                   |
| sample 3                             | 45.29                   | 22.70                    | 31.95                   | 34.64                   | 31.34                   | 1.36      | 0.68                     | 0.96                    | 1.04                    | 0.94                   |
| sample 4                             | 43.84                   | 20.97                    | 31.74                   | 31.31                   | 32.05                   | 1.32      | 0.63                     | 0.95                    | 0.94                    | 0.96                   |
| sample 5                             | 47.69                   | 22.62                    | 31.83                   | 32.36                   | 31.63                   | 1.43      | 0.68                     | 0.95                    | 0.97                    | 0.95                   |
| sample 6                             | 48.35                   | 23.10                    | 32.81                   | 33.30                   | 33.38                   | 1.45      | 0.69                     | 0.98                    | 1.00                    | 1.00                   |
| Mean                                 | 46.30                   | 21.63                    | 30.99                   | 32.63                   | 31.47                   | 1.39      | 0.65                     | 0.93                    | 0.98                    | 0.94                   |
| SD                                   | 1.63                    | 1.34                     | 1.84                    | 1.52                    | 1.33                    | 0.05      | 0.04                     | 0.06                    | 0.05                    | 0.04                   |
| Unpaired t-test vs <i>prst1 prs3</i> | 1.2E-10                 |                          | 3.0E-06                 | 1.3E-07                 | 1.6E-07                 | 1.2E-10   |                          | 3.0E-06                 | 1.3E-07                 | 1.6E-07                |

**Table S9: Raw data Figure 6**

**B : Doubling Time**

|                                     | Doubling Time (min) | Doubling Time (min) | Doubling Time (min) | Doubling Time (min)            |
|-------------------------------------|---------------------|---------------------|---------------------|--------------------------------|
|                                     | WT                  | <i>prs1 prs3</i>    | WT + Supplements    | <i>prs1 prs3</i> + supplements |
| sample 1                            | 98,7                | 333,7               | 85,8                | 103,4                          |
| sample 2                            | 94,6                | 317,2               | 92,7                | 110,4                          |
| sample 3                            | 97,5                | 339,1               | 91,9                | 102,4                          |
| Unpaired t-test vs WT               |                     | 5,6E-04             | 0,07                | 0,06                           |
| Unpaired t-test vs <i>prs1 prs3</i> | 5,6E-04             |                     | 2,5E-04             | 2,1E-04                        |

**C: [PRPP] in mM**

|                                     | Peak area | Peak area        | Peak area        | Peak area                      | mM in cells | mM in cells      | mM in cells      | mM in cells                    |
|-------------------------------------|-----------|------------------|------------------|--------------------------------|-------------|------------------|------------------|--------------------------------|
| Metabolite                          | PRPP      | PRPP             | PRPP             | PRPP                           | PRPP        | PRPP             | PRPP             | PRPP                           |
| Strain                              | WT        | <i>prs1 prs3</i> | WT + Supplements | <i>prs1 prs3</i> + supplements | WT          | <i>prs1 prs3</i> | WT + Supplements | <i>prs1 prs3</i> + supplements |
| sample 1                            | 0,0220    | 0,0030           | 0,0200           | 0,0002                         | 0,117       | 0,016            | 0,107            | 0,001                          |
| sample 2                            | 0,0220    | 0,0024           | 0,0210           | 0,0003                         | 0,117       | 0,013            | 0,112            | 0,002                          |
| sample 3                            | 0,0199    | 0,0029           | 0,0201           | 0,0001                         | 0,106       | 0,015            | 0,107            | 0,001                          |
| sample 4                            | 0,0201    | 0,0029           | 0,0177           | 0,0001                         | 0,107       | 0,015            | 0,094            | 0,001                          |
| Mean                                | 0,0210    | 0,0028           | 0,0197           | 0,0002                         | 0,112       | 0,015            | 0,105            | 0,001                          |
| SD                                  | 0,0012    | 0,0003           | 0,0014           | 0,0001                         | 0,006       | 0,001            | 0,008            | 0,001                          |
| Unpaired t-test vsWT                |           | 3,4E-05          | 0,21             | 4,3E-05                        |             | 3,4E-05          | 0,21             | 4,3E-05                        |
| Unpaired t-test vs <i>prs1 prs3</i> | 3,4E-05   |                  | 1,0E-04          | 8,6E-05                        | 3,4E-05     |                  | 1,0E-04          | 8,6E-05                        |

**C: [ATP] in mM**

|                                     | Peak area | Peak area        | Peak area        | Peak area                      | mM in cells | mM in cells      | mM in cells      | mM in cells                    |
|-------------------------------------|-----------|------------------|------------------|--------------------------------|-------------|------------------|------------------|--------------------------------|
| Metabolite                          | ATP       | ATP              | ATP              | ATP                            | ATP         | ATP              | ATP              | ATP                            |
| Strain                              | WT        | <i>prs1 prs3</i> | WT + Supplements | <i>prs1 prs3</i> + supplements | WT          | <i>prs1 prs3</i> | WT + Supplements | <i>prs1 prs3</i> + supplements |
| sample 1                            | 14,6      | 3,2              | 13,9             | 21,5                           | 3,21        | 0,70             | 3,07             | 4,74                           |
| sample 2                            | 14,5      | 3,0              | 14,5             | 21,6                           | 3,19        | 0,67             | 3,19             | 4,76                           |
| sample 3                            | 14,9      | 4,3              | 14,1             | 21,4                           | 3,29        | 0,96             | 3,11             | 4,72                           |
| sample 4                            | 15,1      | 4,1              | 13,3             | 20,8                           | 3,33        | 0,90             | 2,94             | 4,58                           |
| Mean                                | 14,8      | 3,6              | 14,0             | 21,3                           | 3,26        | 0,80             | 3,08             | 4,70                           |
| SD                                  | 0,3       | 0,6              | 0,5              | 0,4                            | 0,07        | 0,14             | 0,10             | 0,08                           |
| Unpaired t-test vsWT                |           | 3,8E-06          | 0,03             | 3,1E-07                        |             | 3,8E-06          | 3,2E-02          | 3,1E-07                        |
| Unpaired t-test vs <i>prs1 prs3</i> | 3,8E-06   |                  | 6,7E-07          | 1,3E-07                        | 3,8E-06     |                  | 6,7E-07          | 1,3E-07                        |

**E: [GTP] in mM**

|                                     | Peak area | Peak area        | Peak area        | Peak area                      | mM in cells | mM in cells      | mM in cells      | mM in cells                    |
|-------------------------------------|-----------|------------------|------------------|--------------------------------|-------------|------------------|------------------|--------------------------------|
| Metabolite                          | GTP       | GTP              | GTP              | GTP                            | GTP         | GTP              | GTP              | GTP                            |
| Strain                              | WT        | <i>prs1 prs3</i> | WT + Supplements | <i>prs1 prs3</i> + supplements | WT          | <i>prs1 prs3</i> | WT + Supplements | <i>prs1 prs3</i> + supplements |
| sample 1                            | 2,87      | 0,71             | 2,90             | 3,24                           | 0,77        | 0,19             | 0,77             | 0,86                           |
| sample 2                            | 2,79      | 0,69             | 2,96             | 3,36                           | 0,74        | 0,18             | 0,79             | 0,90                           |
| sample 3                            | 2,80      | 0,98             | 2,85             | 3,28                           | 0,74        | 0,26             | 0,76             | 0,87                           |
| sample 4                            | 2,69      | 0,91             | 2,67             | 3,23                           | 0,72        | 0,24             | 0,71             | 0,86                           |
| Mean                                | 2,8       | 0,8              | 2,8              | 3,3                            | 0,74        | 0,22             | 0,76             | 0,87                           |
| SD                                  | 0,1       | 0,1              | 0,1              | 0,1                            | 0,02        | 0,04             | 0,03             | 0,02                           |
| Unpaired t-test vsWT                |           | 5,3E-06          | 0,48             | 6,7E-05                        |             | 5,3E-06          | 0,48             | 6,7E-05                        |
| Unpaired t-test vs <i>prs1 prs3</i> | 5,3E-06   |                  | 7,9E-07          | 5,0E-06                        | 5,3E-06     |                  | 7,9E-07          | 5,0E-06                        |

**F: [UTP] in mM**

|                                     | Peak area | Peak area        | Peak area        | Peak area                      | mM in cells | mM in cells      | mM in cells      | mM in cells                    |
|-------------------------------------|-----------|------------------|------------------|--------------------------------|-------------|------------------|------------------|--------------------------------|
| Metabolite                          | UTP       | UTP              | UTP              | UTP                            | UTP         | UTP              | UTP              | UTP                            |
| Strain                              | WT        | <i>prs1 prs3</i> | WT + Supplements | <i>prs1 prs3</i> + supplements | WT          | <i>prs1 prs3</i> | WT + Supplements | <i>prs1 prs3</i> + supplements |
| sample 1                            | 1,75      | 0,42             | 2,77             | 2,07                           | 0,71        | 0,17             | 1,12             | 0,84                           |
| sample 2                            | 1,63      | 0,39             | 2,64             | 2,10                           | 0,66        | 0,16             | 1,07             | 0,85                           |
| sample 3                            | 1,66      | 0,53             | 2,60             | 2,10                           | 0,67        | 0,21             | 1,05             | 0,85                           |
| sample 4                            | 1,66      | 0,52             | 2,48             | 2,08                           | 0,67        | 0,21             | 1,00             | 0,84                           |
| Mean                                | 1,7       | 0,5              | 2,6              | 2,1                            | 0,68        | 0,19             | 1,06             | 0,84                           |
| SD                                  | 0,1       | 0,1              | 0,1              | 0,0                            | 0,02        | 0,03             | 0,05             | 0,01                           |
| Unpaired t-test vsWT                |           | 2,1E-07          | 1,0E-04          | 3,4E-04                        |             | 2,1E-07          | 1,0E-04          | 3,4E-04                        |
| Unpaired t-test vs <i>prs1 prs3</i> | 2,1E-07   |                  | 1,3E-06          | 8,8E-06                        | 2,1E-07     |                  | 1,3E-06          | 8,8E-06                        |

**G: [CTP] in mM**

|                                     | Peak area | Peak area        | Peak area        | Peak area                      | mM in cells | mM in cells      | mM in cells      | mM in cells                    |
|-------------------------------------|-----------|------------------|------------------|--------------------------------|-------------|------------------|------------------|--------------------------------|
| Metabolite                          | CTP       | CTP              | CTP              | CTP                            | CTP         | CTP              | CTP              | CTP                            |
| Strain                              | WT        | <i>prs1 prs3</i> | WT + Supplements | <i>prs1 prs3</i> + supplements | WT          | <i>prs1 prs3</i> | WT + Supplements | <i>prs1 prs3</i> + supplements |
| sample 1                            | 1,00      | 0,28             | 1,21             | 1,39                           | 0,45        | 0,13             | 0,54             | 0,62                           |
| sample 2                            | 0,99      | 0,27             | 1,23             | 1,39                           | 0,44        | 0,12             | 0,55             | 0,62                           |
| sample 3                            | 1,02      | 0,39             | 1,21             | 1,39                           | 0,46        | 0,17             | 0,54             | 0,63                           |
| sample 4                            | 1,02      | 0,35             | 1,14             | 1,37                           | 0,46        | 0,16             | 0,51             | 0,62                           |
| Mean                                | 1,0       | 0,3              | 1,2              | 1,4                            | 0,45        | 0,14             | 0,54             | 0,62                           |
| SD                                  | 0,0       | 0,1              | 0,0              | 0,0                            | 0,01        | 0,03             | 0,02             | 0,00                           |
| Unpaired t-test vsWT                |           | 6,8E-05          | 6,8E-04          | 6,3E-08                        |             | 6,8E-05          | 6,8E-04          | 6,3E-08                        |
| Unpaired t-test vs <i>prs1 prs3</i> | 6,8E-05   |                  | 1,1E-06          | 2,6E-05                        | 6,8E-05     |                  | 1,1E-06          | 2,6E-05                        |

**H: [NAD<sup>+</sup>] + [NADH] in mM**

|                                     | µM in extract | µM in extract    | µM in extract    | µM in extract                  | mM in cells | mM in cells      | mM in cells      | mM in cells                    |
|-------------------------------------|---------------|------------------|------------------|--------------------------------|-------------|------------------|------------------|--------------------------------|
| Metabolite                          | NAD(H)        | NAD(H)           | NAD(H)           | NAD(H)                         | NAD(H)      | NAD(H)           | NAD(H)           | NAD(H)                         |
| Strain                              | WT            | <i>prs1 prs3</i> | WT + Supplements | <i>prs1 prs3</i> + supplements | WT          | <i>prs1 prs3</i> | WT + Supplements | <i>prs1 prs3</i> + supplements |
| sample 1                            | 63,12         | 18,54            | 63,09            | 42,42                          | 1,26        | 0,37             | 1,26             | 0,85                           |
| sample 2                            | 63,36         | 21,63            | 66,20            | 42,15                          | 1,27        | 0,43             | 1,32             | 0,84                           |
| sample 3                            | 64,56         | 27,24            | 58,57            | 47,46                          | 1,29        | 0,54             | 1,17             | 0,95                           |
| sample 4                            | 68,28         | 23,25            | 62,40            | 45,30                          | 1,37        | 0,46             | 1,25             | 0,91                           |
| Mean                                | 64,8          | 22,7             | 62,6             | 44,3                           | 1,30        | 0,45             | 1,25             | 0,89                           |
| SD                                  | 2,4           | 3,6              | 3,1              | 2,5                            | 0,05        | 0,07             | 0,06             | 0,05                           |
| Unpaired t-test vsWT                |               | 4,7E-06          | 0,30             | 2,3E-05                        |             | 4,7E-06          | 0,30             | 2,3E-05                        |
| Unpaired t-test vs <i>prs1 prs3</i> | 4,7E-06       |                  | 3,6E-06          | 1,3E-04                        | 4,7E-06     |                  | 3,6E-06          | 1,3E-04                        |



## Table S10: Raw data Figure 7

**C: Population doubling time**  
(min)

|                                     | Doubling Time (min) | Doubling Time (min) | Doubling Time (min) | Doubling Time (min) | Doubling Time (min) |
|-------------------------------------|---------------------|---------------------|---------------------|---------------------|---------------------|
| Strain                              | Wild Type           | <i>prs1 prs3</i>    | <i>PRS5 P110S</i>   | <i>PRS5 R311I</i>   | <i>PRS5 D401N</i>   |
| Strain 1                            | 85.9                | 221.6               | 94.6                | 160.2               | 103.1               |
| Strain 2                            | 98.8                | 272.1               | 106.2               | 183.4               | 120.8               |
| Strain 3                            | 91.9                | 244.2               | 100.1               | 175.3               | 111.3               |
| Strain 4                            | 94.1                | 258.5               | 103.4               | 163.4               | 108.9               |
| Unpaired t-test vs <i>prs1 prs3</i> | 4.1E-04             |                     | 5.3E-04             | 2.0E-03             | 4.2E-04             |

**E: [PRPP] in mM**

| Metabolite                          | Peak area | Peak area      | Peak area         | Peak area         | Peak area         | mM in cells | mM in cells    | mM in cells       | mM in cells       | mM in cells       |
|-------------------------------------|-----------|----------------|-------------------|-------------------|-------------------|-------------|----------------|-------------------|-------------------|-------------------|
| Strain                              | Wild Type | <i>PRS5 WT</i> | <i>PRS5 P110S</i> | <i>PRS5 R311I</i> | <i>PRS5 D401N</i> | Wild Type   | <i>PRS5 WT</i> | <i>PRS5 P110S</i> | <i>PRS5 R311I</i> | <i>PRS5 D401N</i> |
| sample 1                            | 0.037     | 0.006          | 0.014             | 0.008             | 0.012             | 0.1480      | 0.0240         | 0.0560            | 0.0320            | 0.0480            |
| sample 2                            | 0.041     | 0.005          | 0.013             | 0.011             | 0.011             | 0.1640      | 0.0200         | 0.0520            | 0.0440            | 0.0440            |
| sample 3                            | 0.036     | 0.004          | 0.013             | 0.009             | 0.010             | 0.1440      | 0.0160         | 0.0520            | 0.0360            | 0.0400            |
| sample 4                            | 0.037     | 0.005          | 0.014             | 0.010             | 0.012             | 0.1480      | 0.0200         | 0.0560            | 0.0400            | 0.0480            |
| sample 5                            | 0.038     | 0.006          | 0.012             | 0.010             | 0.011             | 0.1520      | 0.0240         | 0.0480            | 0.0400            | 0.0440            |
| sample 6                            | 0.037     | 0.005          | 0.013             | 0.011             | 0.013             | 0.1480      | 0.0200         | 0.0520            | 0.0440            | 0.0520            |
| Mean                                | 0.038     | 0.005          | 0.013             | 0.010             | 0.012             | 0.15        | 0.02           | 0.05              | 0.04              | 0.05              |
| SD                                  | 0.002     | 0.001          | 0.001             | 0.001             | 0.001             | 0.01        | 0.00           | 0.00              | 0.00              | 0.00              |
| Unpaired t-test vs <i>prs1 prs3</i> | 1.9E-09   |                | 4.8E-09           | 2.4E-05           | 7.1E-07           | 1.9E-09     |                | 4.8E-09           | 2.4E-05           | 7.1E-07           |

**F: [ATP] in mM**

| Metabolite                          | Peak area | Peak area      | Peak area         | Peak area         | Peak area         | mM in cells | mM in cells    | mM in cells       | mM in cells       | mM in cells       |
|-------------------------------------|-----------|----------------|-------------------|-------------------|-------------------|-------------|----------------|-------------------|-------------------|-------------------|
| Strain                              | Wild Type | <i>PRS5 WT</i> | <i>PRS5 P110S</i> | <i>PRS5 R311I</i> | <i>PRS5 D401N</i> | Wild Type   | <i>PRS5 WT</i> | <i>PRS5 P110S</i> | <i>PRS5 R311I</i> | <i>PRS5 D401N</i> |
| sample 1                            | 20.10     | 9.88           | 15.47             | 13.24             | 15.90             | 3.94        | 1.94           | 3.03              | 2.60              | 3.12              |
| sample 2                            | 20.32     | 9.92           | 16.00             | 15.57             | 15.75             | 3.98        | 1.94           | 3.14              | 3.05              | 3.09              |
| sample 3                            | 20.23     | 10.26          | 15.98             | 14.19             | 15.78             | 3.97        | 2.01           | 3.13              | 2.78              | 3.09              |
| sample 4                            | 21.43     | 9.84           | 15.91             | 13.26             | 15.74             | 4.20        | 1.93           | 3.12              | 2.60              | 3.09              |
| sample 5                            | 19.74     | 9.91           | 15.29             | 13.38             | 15.02             | 3.87        | 1.94           | 3.00              | 2.62              | 2.95              |
| sample 6                            | 21.05     | 9.27           | 15.09             | 13.28             | 15.56             | 4.13        | 1.82           | 2.96              | 2.60              | 3.05              |
| Mean                                | 20.48     | 9.85           | 15.62             | 13.82             | 15.63             | 4.02        | 1.93           | 3.06              | 2.71              | 3.06              |
| SD                                  | 0.63      | 0.32           | 0.39              | 0.93              | 0.32              | 0.12        | 0.06           | 0.08              | 0.18              | 0.06              |
| Unpaired t-test vs <i>prs1 prs3</i> | 1.2E-09   |                | 1.6E-10           | 5.2E-05           | 2.5E-11           | 1.2E-09     |                | 1.6E-10           | 5.2E-05           | 2.5E-11           |

**G: [GTP] in mM**

| Metabolite                          | Peak area | Peak area      | Peak area         | Peak area         | Peak area         | mM in cells | mM in cells    | mM in cells       | mM in cells       | mM in cells       |
|-------------------------------------|-----------|----------------|-------------------|-------------------|-------------------|-------------|----------------|-------------------|-------------------|-------------------|
| Strain                              | Wild Type | <i>PRS5 WT</i> | <i>PRS5 P110S</i> | <i>PRS5 R311I</i> | <i>PRS5 D401N</i> | Wild Type   | <i>PRS5 WT</i> | <i>PRS5 P110S</i> | <i>PRS5 R311I</i> | <i>PRS5 D401N</i> |
| sample 1                            | 3.89      | 0.81           | 1.59              | 1.31              | 1.67              | 0.91        | 0.19           | 0.37              | 0.31              | 0.39              |
| sample 2                            | 4.01      | 0.82           | 1.71              | 1.47              | 1.64              | 0.94        | 0.19           | 0.40              | 0.34              | 0.38              |
| sample 3                            | 4.07      | 0.84           | 1.72              | 1.34              | 1.69              | 0.95        | 0.19           | 0.40              | 0.31              | 0.39              |
| sample 4                            | 4.36      | 0.79           | 1.74              | 1.38              | 1.64              | 1.02        | 0.18           | 0.41              | 0.32              | 0.38              |
| sample 5                            | 3.91      | 0.81           | 1.68              | 1.27              | 1.54              | 0.91        | 0.19           | 0.39              | 0.30              | 0.36              |
| sample 6                            | 4.23      | 0.78           | 1.57              | 1.26              | 1.74              | 0.99        | 0.18           | 0.36              | 0.29              | 0.41              |
| Mean                                | 4.08      | 0.81           | 1.67              | 1.34              | 1.65              | 0.95        | 0.19           | 0.39              | 0.31              | 0.39              |
| SD                                  | 0.18      | 0.02           | 0.07              | 0.08              | 0.07              | 0.04        | 0.00           | 0.02              | 0.02              | 0.02              |
| Unpaired t-test vs <i>prs1 prs3</i> | 9.3E-08   |                | 2.6E-07           | 5.8E-06           | 1.2E-07           | 9.3E-08     |                | 2.6E-07           | 5.8E-06           | 1.2E-07           |

**H: [UTP] in mM**

| Metabolite                          | Peak area | Peak area      | Peak area         | Peak area         | Peak area         | mM in cells | mM in cells    | mM in cells       | mM in cells       | mM in cells       |
|-------------------------------------|-----------|----------------|-------------------|-------------------|-------------------|-------------|----------------|-------------------|-------------------|-------------------|
| Strain                              | Wild Type | <i>PRS5 WT</i> | <i>PRS5 P110S</i> | <i>PRS5 R311I</i> | <i>PRS5 D401N</i> | Wild Type   | <i>PRS5 WT</i> | <i>PRS5 P110S</i> | <i>PRS5 R311I</i> | <i>PRS5 D401N</i> |
| sample 1                            | 3.16      | 1.26           | 1.71              | 2.00              | 1.85              | 1.12        | 0.44           | 0.61              | 0.71              | 0.66              |
| sample 2                            | 3.29      | 1.25           | 1.82              | 1.96              | 1.97              | 1.16        | 0.44           | 0.64              | 0.69              | 0.70              |
| sample 3                            | 3.26      | 1.20           | 1.87              | 1.89              | 1.37              | 1.15        | 0.42           | 0.66              | 0.67              | 0.38              |
| sample 4                            | 3.49      | 1.23           | 1.80              | 1.90              | 2.29              | 1.23        | 0.43           | 0.64              | 0.67              | 0.81              |
| sample 5                            | 3.39      | 1.20           | 1.75              | 1.67              | 1.93              | 1.20        | 0.42           | 0.62              | 0.59              | 0.68              |
| sample 6                            | 3.56      | 1.20           | 1.67              | 1.90              | 2.04              | 1.26        | 0.43           | 0.59              | 0.67              | 0.72              |
| Mean                                | 3.36      | 1.22           | 1.77              | 1.89              | 2.02              | 1.19        | 0.43           | 0.63              | 0.67              | 0.71              |
| SD                                  | 0.15      | 0.03           | 0.08              | 0.11              | 0.17              | 0.05        | 0.01           | 0.03              | 0.04              | 0.06              |
| Unpaired t-test vs <i>prs1 prs3</i> | 2.1E-07   |                | 2.2E-06           | 1.7E-05           | 3.8E-04           | 2.1E-07     |                | 2.2E-06           | 1.7E-05           | 3.8E-04           |

**I: [CTP] in mM**

| Metabolite                          | Peak area | Peak area      | Peak area         | Peak area         | Peak area         | mM in cells | mM in cells    | mM in cells       | mM in cells       | mM in cells       |
|-------------------------------------|-----------|----------------|-------------------|-------------------|-------------------|-------------|----------------|-------------------|-------------------|-------------------|
| Strain                              | Wild Type | <i>PRS5 WT</i> | <i>PRS5 P110S</i> | <i>PRS5 R311I</i> | <i>PRS5 D401N</i> | Wild Type   | <i>PRS5 WT</i> | <i>PRS5 P110S</i> | <i>PRS5 R311I</i> | <i>PRS5 D401N</i> |
| sample 1                            | 2.81      | 1.01           | 1.43              | 1.47              | 1.46              | 0.79        | 0.28           | 0.40              | 0.41              | 0.41              |
| sample 2                            | 2.82      | 1.00           | 1.46              | 1.73              | 1.48              | 0.79        | 0.28           | 0.41              | 0.49              | 0.41              |
| sample 3                            | 2.81      | 0.99           | 1.50              | 1.58              | 1.37              | 0.79        | 0.28           | 0.42              | 0.44              | 0.38              |
| sample 4                            | 2.91      | 0.98           | 1.45              | 1.55              | 1.41              | 0.82        | 0.27           | 0.41              | 0.43              | 0.40              |
| sample 5                            | 2.73      | 0.99           | 1.38              | 1.53              | 1.35              | 0.77        | 0.28           | 0.39              | 0.43              | 0.38              |
| sample 6                            | 2.91      | 0.93           | 1.45              | 1.52              | 1.37              | 0.82        | 0.26           | 0.41              | 0.43              | 0.38              |
| Mean                                | 2.83      | 0.98           | 1.44              | 1.56              | 1.41              | 0.79        | 0.28           | 0.41              | 0.44              | 0.39              |
| SD                                  | 0.07      | 0.03           | 0.04              | 0.09              | 0.05              | 0.02        | 0.01           | 0.01              | 0.03              | 0.01              |
| Unpaired t-test vs <i>prs1 prs3</i> | 3.2E-10   |                | 2.6E-09           | 7.0E-06           | 3.1E-07           | 3.2E-10     |                | 2.6E-09           | 7.0E-06           | 3.1E-07           |

**J: [NAD(H)] in mM**

| Metabolite                          | Peak area | Peak area      | Peak area         | Peak area         | Peak area         | mM in cells | mM in cells    | mM in cells       | mM in cells       | mM in cells       |
|-------------------------------------|-----------|----------------|-------------------|-------------------|-------------------|-------------|----------------|-------------------|-------------------|-------------------|
| Strain                              | Wild Type | <i>PRS5 WT</i> | <i>PRS5 P110S</i> | <i>PRS5 R311I</i> | <i>PRS5 D401N</i> | Wild Type   | <i>PRS5 WT</i> | <i>PRS5 P110S</i> | <i>PRS5 R311I</i> | <i>PRS5 D401N</i> |
| sample 1                            | 88.4      | 47.3           | 70.5              | 64.7              | 64.2              | 2.83        | 1.35           | 2.01              | 1.85              | 1.83              |
| sample 2                            | 95.8      | 52.4           | 72.8              | 71.4              | 77.0              | 2.74        | 1.50           | 2.08              | 2.04              | 2.20              |
| sample 3                            | 101.7     | 46.5           | 80.4              | 70.7              | 74.9              | 2.91        | 1.33           | 2.30              | 2.02              | 2.14              |
| sample 4                            | 102.1     | 48.5           | 77.9              | 67.4              | 74.1              | 2.92        | 1.39           | 2.23              | 1.93              | 2.12              |
| sample 5                            | 96.1      | 49.2           | 72.8              | 65.0              | 70.4              | 2.75        | 1.41           | 2.08              | 1.86              | 2.01              |
| sample 6                            | 95.3      | 48.8           | 69.3              | 61.6              | 81.0              | 2.72        | 1.39           | 1.98              | 1.76              | 2.31              |
| Mean                                | 96.56     | 48.80          | 73.95             | 66.81             | 73.61             | 2.76        | 1.39           | 2.11              | 1.91              | 2.10              |
| SD                                  | 5.01      | 2.03           | 4.32              | 3.77              | 5.79              | 0.14        | 0.06           | 0.12              | 0.11              | 0.17              |
| Unpaired t-test vs <i>prs1 prs3</i> | 2.3E-07   |                | 3.4E-06           | 9.2E-06           | 4.9E-05           | 2.3E-07     |                | 3.4E-06           | 9.2E-06           | 4.9E-05           |

## Table S11: Raw data Figure 8 (Part 1/2)

### A: [PRPP] in mM

|                                 | Peak area | Peak area | Peak area   | Peak area   | mM       | mM       | mM          | mM          |
|---------------------------------|-----------|-----------|-------------|-------------|----------|----------|-------------|-------------|
| Metabolite                      | PRPP      | PRPP      | PRPP        | PRPP        | in cells | in cells | in cells    | in cells    |
| Strain                          | Control   | PRPS1 WT  | PRPS1 V142L | PRPS1 A190V | Control  | PRPS1 WT | PRPS1 V142L | PRPS1 A190V |
| sample 1                        | 0,028     | 0,027     |             | 0,044       | 0,112    | 0,108    |             | 0,176       |
| sample 2                        | 0,030     | 0,026     | 0,038       | 0,043       | 0,120    | 0,104    | 0,152       | 0,172       |
| sample 3                        | 0,030     | 0,026     | 0,043       | 0,051       | 0,120    | 0,104    | 0,172       | 0,204       |
| sample 4                        | 0,033     | 0,031     | 0,045       | 0,049       | 0,132    | 0,124    | 0,180       | 0,196       |
| sample 5                        | 0,029     | 0,028     | 0,041       | 0,047       | 0,116    | 0,112    | 0,164       | 0,188       |
| sample 6                        | 0,034     | 0,029     | 0,043       | 0,051       | 0,136    | 0,116    | 0,172       | 0,204       |
| Mean                            | 0,031     | 0,028     | 0,042       | 0,048       | 0,123    | 0,111    | 0,168       | 0,190       |
| SD                              | 0,002     | 0,002     | 0,003       | 0,003       | 0,009    | 0,008    | 0,011       | 0,014       |
| Unpaired t-test vs empty vector |           | 4,6E-02   | 6,6E-05     | 4,6E-06     |          | 4,6E-02  | 6,6E-05     | 4,6E-06     |

### B: [ATP] in mM

|                                 | Peak area | Peak area | Peak area   | Peak area   | mM       | mM       | mM          | mM          |
|---------------------------------|-----------|-----------|-------------|-------------|----------|----------|-------------|-------------|
| Metabolite                      | ATP       | ATP       | ATP         | ATP         | in cells | in cells | in cells    | in cells    |
| Strain                          | Control   | PRPS1 WT  | PRPS1 V142L | PRPS1 A190V | Control  | PRPS1 WT | PRPS1 V142L | PRPS1 A190V |
| sample 1                        | 24,6390   | 22,5630   |             | 28,8390     | 3,623    | 3,318    |             | 4,241       |
| sample 2                        | 23,3730   | 23,1000   | 27,0610     | 29,3410     | 3,437    | 3,397    | 3,980       | 4,315       |
| sample 3                        | 24,9750   | 20,3550   | 26,7010     | 26,6500     | 3,673    | 2,993    | 3,927       | 3,919       |
| sample 4                        | 23,4690   | 22,7800   | 28,3900     | 29,3420     | 3,451    | 3,350    | 4,175       | 4,315       |
| sample 5                        | 23,0900   | 22,7100   | 26,0100     | 29,0590     | 3,396    | 3,340    | 3,825       | 4,273       |
| sample 6                        | 24,0700   | 22,2500   | 27,5400     | 29,3300     | 3,540    | 3,272    | 4,050       | 4,313       |
| Mean                            | 23,94     | 22,29     | 27,14       | 28,76       | 3,520    | 3,278    | 3,991       | 4,229       |
| SD                              | 0,75      | 0,89      | 0,89        | 1,05        | 0,111    | 0,145    | 0,131       | 0,155       |
| Unpaired t-test vs empty vector |           | 9,7E-03   | 2,3E-04     | 7,3E-06     |          | 9,7E-03  | 2,3E-04     | 7,3E-06     |

### C: [GTP] in mM

|                                 | Peak area | Peak area | Peak area   | Peak area   | mM       | mM       | mM          | mM          |
|---------------------------------|-----------|-----------|-------------|-------------|----------|----------|-------------|-------------|
| Metabolite                      | GTP       | GTP       | GTP         | GTP         | in cells | in cells | in cells    | in cells    |
| Strain                          | Control   | PRPS1 WT  | PRPS1 V142L | PRPS1 A190V | Control  | PRPS1 WT | PRPS1 V142L | PRPS1 A190V |
| sample 1                        | 4,6890    | 4,0090    |             | 5,6600      | 0,937    | 0,801    |             | 1,130       |
| sample 2                        | 4,3900    | 4,1480    | 5,2100      | 5,7100      | 0,877    | 0,828    | 1,041       | 1,140       |
| sample 3                        | 4,7800    | 3,7300    | 5,2800      | 4,8800      | 0,955    | 0,745    | 1,055       | 0,975       |
| sample 4                        | 4,4390    | 4,3300    | 5,5500      | 5,7800      | 0,887    | 0,865    | 1,109       | 1,154       |
| sample 5                        | 4,4700    | 4,2500    | 5,1900      | 5,7400      | 0,893    | 0,849    | 1,037       | 1,146       |
| sample 6                        | 4,5400    | 4,4500    | 5,5700      | 5,9100      | 0,907    | 0,889    | 1,113       | 1,180       |
| Mean                            | 4,55      | 4,15      | 5,36        | 5,61        | 0,909    | 0,829    | 1,071       | 1,121       |
| SD                              | 0,15      | 0,26      | 0,19        | 0,37        | 0,031    | 0,051    | 0,037       | 0,074       |
| Unpaired t-test vs empty vector |           | 0,01      | 6,1E-05     | 4,1E-04     |          | 0,01     | 6,1E-05     | 4,1E-04     |

### D: [UTP] in mM

|                                 | Peak area | Peak area | Peak area   | Peak area   | mM       | mM       | mM          | mM          |
|---------------------------------|-----------|-----------|-------------|-------------|----------|----------|-------------|-------------|
| Metabolite                      | UTP       | UTP       | UTP         | UTP         | in cells | in cells | in cells    | in cells    |
| Strain                          | Control   | PRPS1 WT  | PRPS1 V142L | PRPS1 A190V | Control  | PRPS1 WT | PRPS1 V142L | PRPS1 A190V |
| sample 1                        | 2,5800    | 2,2500    |             | 3,1200      | 0,782    | 0,682    |             | 0,945       |
| sample 2                        | 2,4900    | 2,2900    | 2,9600      | 3,2200      | 0,755    | 0,694    | 0,897       | 0,976       |
| sample 3                        | 2,8080    | 2,0000    | 2,7310      | 3,0630      | 0,851    | 0,606    | 0,828       | 0,928       |
| sample 4                        | 2,5600    | 2,4010    | 3,0380      | 3,1770      | 0,776    | 0,728    | 0,921       | 0,963       |
| sample 5                        | 2,5020    | 2,2790    | 2,8300      | 3,2470      | 0,758    | 0,691    | 0,858       | 0,984       |
| sample 6                        | 2,5600    | 2,4040    | 3,0200      | 3,3300      | 0,776    | 0,728    | 0,915       | 1,009       |
| Mean                            | 2,58      | 2,27      | 2,92        | 3,19        | 0,783    | 0,688    | 0,884       | 0,968       |
| SD                              | 0,12      | 0,15      | 0,13        | 0,09        | 0,035    | 0,045    | 0,040       | 0,029       |
| Unpaired t-test vs empty vector |           | 2,5E-03   | 2,2E-03     | 2,2E-06     |          | 2,5E-03  | 2,2E-03     | 2,2E-06     |

### E: [CTP] in mM

|                                 | Peak area | Peak area | Peak area   | Peak area   | mM       | mM       | mM          | mM          |
|---------------------------------|-----------|-----------|-------------|-------------|----------|----------|-------------|-------------|
| Metabolite                      | CTP       | CTP       | CTP         | CTP         | in cells | in cells | in cells    | in cells    |
| Strain                          | Control   | PRPS1 WT  | PRPS1 V142L | PRPS1 A190V | Control  | PRPS1 WT | PRPS1 V142L | PRPS1 A190V |
| sample 1                        | 2,8200    | 2,5300    | 2,8090      | 3,3900      | 0,949    | 0,852    |             | 1,141       |
| sample 2                        | 2,7400    | 2,6300    | 3,1120      | 3,4100      | 0,923    | 0,886    | 1,048       | 1,148       |
| sample 3                        | 2,9300    | 2,3500    | 3,1440      | 2,9310      | 0,987    | 0,791    | 1,059       | 0,987       |
| sample 4                        | 2,8220    | 2,4460    | 3,2680      | 3,4760      | 0,950    | 0,824    | 1,100       | 1,170       |
| sample 5                        | 2,5950    | 2,5970    | 3,0070      | 3,4560      | 0,874    | 0,874    | 1,012       | 1,164       |
| sample 6                        | 2,8100    | 2,8330    | 3,0510      | 3,4440      | 0,946    | 0,954    | 1,027       | 1,160       |
| Mean                            | 2,79      | 2,56      | 3,07        | 3,35        | 0,938    | 0,863    | 1,049       | 1,128       |
| SD                              | 0,11      | 0,17      | 0,15        | 0,21        | 0,038    | 0,056    | 0,034       | 0,070       |
| Unpaired t-test vs empty vector |           | 0,02      | 5,7E-03     | 4,5E-04     |          | 0,02     | 6,0E-04     | 4,5E-04     |

### F: [NAD(H)] in mM

|                                 | mM       | mM       | mM          | mM          |
|---------------------------------|----------|----------|-------------|-------------|
| Metabolite                      | in cells | in cells | in cells    | in cells    |
| Strain                          | NAD(H)   | NAD(H)   | (NADH)      | (NADH)      |
| Strain                          | Control  | PRPS1 WT | PRPS1 V142L | PRPS1 A190V |
| sample 1                        | 1,9385   | 1,8617   |             | 2,4532      |
| sample 2                        | 1,9335   | 1,8906   | 2,3750      | 2,4179      |
| sample 3                        | 2,1209   | 1,7032   | 2,3389      | 2,2621      |
| sample 4                        | 2,1006   | 1,9662   | 2,4430      | 2,4590      |
| sample 5                        | 1,9955   | 1,9338   | 2,2827      | 2,5381      |
| sample 6                        | 2,0840   | 2,0527   | 2,3121      | 2,5029      |
| Mean                            | 2,03     | 1,90     | 2,35        | 2,44        |
| SD                              | 0,08     | 0,12     | 0,06        | 0,10        |
| Unpaired t-test vs empty vector |          | 0,06     | 4,8E-05     | 1,5E-05     |

## Table S11: Raw data Figure 8 (Part 2/2)

### G: Doubling time (min)

| Metabolite                      | AEC     | AEC      | AEC         | AEC         |
|---------------------------------|---------|----------|-------------|-------------|
| Strain                          | Control | PRPS1 WT | PRPS1 V142L | PRPS1 A190V |
| sample 1                        | 81,330  | 84,140   | 90,740      | 89,890      |
| sample 2                        | 82,300  | 89,980   | 92,040      | 89,160      |
| sample 3                        | 84,660  | 85,500   | 94,490      | 91,150      |
| sample 4                        | 84,700  | 87,988   | 91,470      | 89,200      |
| Mean                            | 83,25   | 86,90    | 92,19       | 89,85       |
| SD                              | 1,70    | 2,60     | 1,63        | 0,93        |
| Unpaired t-test vs empty vector |         | 0,06     | 2,7E-04     | 1,4E-03     |

### H: [SZMP] in mM

| Metabolite                      | Peak area | Peak area | Peak area   | Peak area   | mM       | mM       | mM          | mM          |
|---------------------------------|-----------|-----------|-------------|-------------|----------|----------|-------------|-------------|
|                                 | S-ZMP     | S-ZMP     | S-ZMP       | S-ZMP       | in cells | in cells | in cells    | in cells    |
| Strain                          | Control   | PRPS1 WT  | PRPS1 V142L | PRPS1 A190V | Control  | PRPS1 WT | PRPS1 V142L | PRPS1 A190V |
| sample 1                        | 0,0050    | 0,0030    | 0,0610      | 0,0460      | 0,00127  | 0,00076  |             | 0,01172     |
| sample 2                        | 0,0050    | 0,0040    | 0,0650      | 0,0520      | 0,00127  | 0,00102  | 0,01657     | 0,01325     |
| sample 3                        | 0,0050    | 0,0040    | 0,0610      | 0,0370      | 0,00127  | 0,00102  | 0,01555     | 0,00943     |
| sample 4                        | 0,0070    | 0,0060    | 0,0590      | 0,0550      | 0,00178  | 0,00153  | 0,01504     | 0,01402     |
| sample 5                        | 0,0060    | 0,0040    | 0,0580      | 0,0600      | 0,00153  | 0,00102  | 0,01478     | 0,01529     |
| sample 6                        | 0,0070    | 0,0050    | 0,0630      | 0,0570      | 0,00178  | 0,00127  | 0,01606     | 0,01453     |
| Mean                            | 0,0058    | 0,0043    | 0,0612      | 0,0512      | 0,001    | 0,001    | 0,016       | 0,013       |
| SD                              | 0,0010    | 0,0010    | 0,0026      | 0,0084      | 0,000    | 0,000    | 0,001       | 0,002       |
| Unpaired t-test vs empty vector |           | 0,03      | 1,5E-09     | 3,8E-05     |          | 0,03     | 2,7E-07     | 3,8E-05     |

### I: [IMP] in mM

| Metabolite                      | Peak area | Peak area | Peak area   | Peak area   | mM       | mM       | mM          | mM          |
|---------------------------------|-----------|-----------|-------------|-------------|----------|----------|-------------|-------------|
|                                 | IMP       | IMP       | IMP         | IMP         | in cells | in cells | in cells    | in cells    |
| Strain                          | Control   | PRPS1 WT  | PRPS1 V142L | PRPS1 A190V | Control  | PRPS1 WT | PRPS1 V142L | PRPS1 A190V |
| sample 1                        | 0,139     | 0,092     | 0,591       | 0,693       | 0,062    | 0,041    |             | 0,310       |
| sample 2                        | 0,129     | 0,101     | 0,683       | 0,704       | 0,058    | 0,045    | 0,305       | 0,315       |
| sample 3                        | 0,145     | 0,110     | 0,721       | 0,596       | 0,065    | 0,049    | 0,322       | 0,266       |
| sample 4                        | 0,176     | 0,113     | 0,728       | 0,725       | 0,079    | 0,051    | 0,325       | 0,324       |
| sample 5                        | 0,150     | 0,126     | 0,690       | 0,761       | 0,067    | 0,056    | 0,308       | 0,340       |
| sample 6                        | 0,144     | 0,117     | 0,609       | 0,690       | 0,064    | 0,052    | 0,272       | 0,308       |
| Mean                            | 0,147     | 0,110     | 0,670       | 0,695       | 0,066    | 0,049    | 0,307       | 0,311       |
| SD                              | 0,016     | 0,012     | 0,057       | 0,055       | 0,007    | 0,005    | 0,021       | 0,025       |
| Unpaired t-test vs empty vector |           | 1,2E-03   | 1,0E-06     | 5,6E-07     |          | 1,2E-03  | 3,6E-06     | 5,6E-07     |

### J: [Inosine] in mM

| Metabolite                      | Peak area | Peak area | Peak area   | Peak area   | mM       | mM       | mM          | mM          |
|---------------------------------|-----------|-----------|-------------|-------------|----------|----------|-------------|-------------|
|                                 | Inosine   | Inosine   | Inosine     | Inosine     | in cells | in cells | in cells    | in cells    |
| Strain                          | Control   | PRPS1 WT  | PRPS1 V142L | PRPS1 A190V | Control  | PRPS1 WT | PRPS1 V142L | PRPS1 A190V |
| sample 1                        | 0,819     | 0,686     |             | 9,787       | 0,159    | 0,133    |             | 1,902       |
| sample 2                        | 0,734     | 0,659     | 11,740      | 9,470       | 0,143    | 0,128    | 2,281       | 1,840       |
| sample 3                        | 0,827     | 0,553     | 13,050      | 7,730       | 0,161    | 0,107    | 2,536       | 1,502       |
| sample 4                        | 0,848     | 0,677     | 13,460      | 9,070       | 0,165    | 0,132    | 2,615       | 1,762       |
| sample 5                        | 0,931     | 0,742     | 10,480      | 10,440      | 0,181    | 0,144    | 2,036       | 2,028       |
| sample 6                        | 0,847     | 0,757     | 8,710       | 10,130      | 0,165    | 0,147    | 1,692       | 1,968       |
| Mean                            | 0,834     | 0,679     | 11,488      | 9,438       | 0,162    | 0,132    | 2,232       | 1,834       |
| SD                              | 0,063     | 0,073     | 1,945       | 0,965       | 0,012    | 0,014    | 0,378       | 0,188       |
| Unpaired t-test vs empty vector |           | 2,8E-03   | 2,5E-04     | 3,5E-06     |          | 2,8E-03  | 2,5E-04     | 3,5E-06     |

## Table S12: Raw data Figure 9

D: [ATP] in mM

|                                         | Intracellular concentration | Intracellular concentration | Intracellular concentration | Intracellular concentration |
|-----------------------------------------|-----------------------------|-----------------------------|-----------------------------|-----------------------------|
| Metabolite (mM)                         | [ATP]                       | [ATP]                       | [ATP]                       | [ATP]                       |
| Strain                                  | <i>ADE4</i> - adenine       | <i>ade4Δ</i> - adenine      | <i>ADE4</i> + adenine       | <i>ade4Δ</i> + adenine      |
| sample 1                                | 3,500                       | 0,390                       | 3,581                       | 3,390                       |
| sample 2                                | 3,275                       | 0,380                       | 3,663                       | 3,403                       |
| sample 3                                | 3,405                       | 0,350                       | 4,003                       | 3,568                       |
| sample 4                                | 3,103                       | 0,430                       | 3,922                       | 3,599                       |
| Mean                                    | 3,32                        | 0,39                        | 3,79                        | 3,49                        |
| SD                                      | 0,17                        | 0,03                        | 0,20                        | 0,11                        |
| Unpaired t-test vs <i>ADE4</i> -adenine |                             | 3,3E-05                     | 1,3E-02                     | 1,6E-01                     |

E: [GTP] in mM

|                                         | Intracellular concentration | Intracellular concentration | Intracellular concentration | Intracellular concentration |
|-----------------------------------------|-----------------------------|-----------------------------|-----------------------------|-----------------------------|
| Metabolite (mM)                         | [GTP]                       | [GTP]                       | [GTP]                       | [GTP]                       |
| Strain                                  | <i>ADE4</i> - adenine       | <i>ade4Δ</i> - adenine      | <i>ADE4</i> + adenine       | <i>ade4Δ</i> + adenine      |
| sample 1                                | 0,955                       | 0,374                       | 0,841                       | 0,823                       |
| sample 2                                | 0,936                       | 0,373                       | 0,863                       | 0,897                       |
| sample 3                                | 0,884                       | 0,359                       | 0,964                       | 0,881                       |
| sample 4                                | 0,802                       | 0,368                       | 0,957                       | 0,871                       |
| Mean                                    | 0,89                        | 0,37                        | 0,91                        | 0,87                        |
| SD                                      | 0,07                        | 0,01                        | 0,06                        | 0,03                        |
| Unpaired t-test vs <i>ADE4</i> -adenine |                             | 5,5E-04                     | 8,1E-01                     | 5,3E-01                     |

F: [CTP] in mM

|                                         | Intracellular concentration | Intracellular concentration | Intracellular concentration | Intracellular concentration |
|-----------------------------------------|-----------------------------|-----------------------------|-----------------------------|-----------------------------|
| Metabolite (mM)                         | [CTP]                       | [CTP]                       | [CTP]                       | [CTP]                       |
| Strain                                  | <i>ADE4</i> - adenine       | <i>ade4Δ</i> - adenine      | <i>ADE4</i> + adenine       | <i>ade4Δ</i> + adenine      |
| sample 1                                | 0,475                       | 0,246                       | 0,453                       | 0,467                       |
| sample 2                                | 0,445                       | 0,257                       | 0,446                       | 0,493                       |
| sample 3                                | 0,449                       | 0,251                       | 0,526                       | 0,495                       |
| sample 4                                | 0,407                       | 0,260                       | 0,510                       | 0,500                       |
| Mean                                    | 0,44                        | 0,25                        | 0,48                        | 0,49                        |
| SD                                      | 0,03                        | 0,01                        | 0,04                        | 0,03                        |
| Unpaired t-test vs <i>ADE4</i> -adenine |                             | 5,5E-04                     | 1,6E-01                     | 4,1E-02                     |

G: [NAD<sup>+</sup> + NADH] in mM

|                                         | Intracellular concentration | Intracellular concentration | Intracellular concentration | Intracellular concentration |
|-----------------------------------------|-----------------------------|-----------------------------|-----------------------------|-----------------------------|
| Metabolite (mM)                         | [NAD(H)]                    | [NAD(H)]                    | [NAD(H)]                    | [NAD(H)]                    |
| Strain                                  | <i>ADE4</i> - adenine       | <i>ade4Δ</i> - adenine      | <i>ADE4</i> + adenine       | <i>ade4Δ</i> + adenine      |
| sample 1                                | 1,623                       | 0,789                       | 1,775                       | 1,917                       |
| sample 2                                | 1,935                       | 0,785                       | 1,940                       | 1,974                       |
| sample 3                                | 1,848                       | 0,793                       | 1,993                       | 2,098                       |
| sample 4                                | 1,952                       | 0,818                       | 2,114                       | 2,233                       |
| Mean                                    | 1,84                        | 0,80                        | 1,96                        | 2,06                        |
| SD                                      | 0,15                        | 0,01                        | 0,14                        | 0,14                        |
| Unpaired t-test vs <i>ADE4</i> -adenine |                             | 7,6E-04                     | 3,0E-01                     | 8,1E-02                     |

H: [UTP] in mM

|                                         | Intracellular concentration | Intracellular concentration | Intracellular concentration | Intracellular concentration |
|-----------------------------------------|-----------------------------|-----------------------------|-----------------------------|-----------------------------|
| Metabolite (mM)                         | [UTP]                       | [UTP]                       | [UTP]                       | [UTP]                       |
| Strain                                  | <i>ADE4</i> - adenine       | <i>ade4Δ</i> - adenine      | <i>ADE4</i> + adenine       | <i>ade4Δ</i> + adenine      |
| sample 1                                | 0,964                       | 3,931                       | 0,941                       | 1,024                       |
| sample 2                                | 0,928                       | 4,052                       | 1,042                       | 1,116                       |
| sample 3                                | 0,946                       | 4,344                       | 1,218                       | 1,336                       |
| sample 4                                | 0,958                       | 4,276                       | 1,269                       | 1,228                       |
| Mean                                    | 0,95                        | 4,15                        | 1,12                        | 1,18                        |
| SD                                      | 0,02                        | 0,19                        | 0,15                        | 0,14                        |
| Unpaired t-test vs <i>ADE4</i> -adenine |                             | 5,4E-05                     | 1,1E-01                     | 4,3E-02                     |

I: [UTP] in mM

|                           | Intracellular concentration | Intracellular concentration |
|---------------------------|-----------------------------|-----------------------------|
| Metabolite (mM)           | [UTP]                       | [UTP]                       |
|                           | vector                      | <i>Ade4</i> R328K           |
| sample 1                  | 0,955                       | 0,504                       |
| sample 2                  | 0,929                       | 0,572                       |
| sample 3                  | 0,838                       | 0,574                       |
| sample 4                  | 0,944                       | 0,545                       |
| Mean                      | 0,92                        | 0,55                        |
| SD                        | 0,05                        | 0,03                        |
| Unpaired t-test vs vector |                             | 8,4E-05                     |

J: [CTP] in mM

|                           | Intracellular concentration | Intracellular concentration |
|---------------------------|-----------------------------|-----------------------------|
| Metabolite (mM)           | [CTP]                       | [CTP]                       |
|                           | vector                      | <i>Ade4</i> R328K           |
| sample 1                  | 0,461                       | 0,325                       |
| sample 2                  | 0,451                       | 0,358                       |
| sample 3                  | 0,459                       | 0,338                       |
| sample 4                  | 0,449                       | 0,327                       |
| Mean                      | 0,45                        | 0,34                        |
| SD                        | 0,01                        | 0,02                        |
| Unpaired t-test vs vector |                             | 1,5E-04                     |

K: [ATP] in mM

|                           | Intracellular concentration | Intracellular concentration |
|---------------------------|-----------------------------|-----------------------------|
| Metabolite (mM)           | [ATP]                       | [ATP]                       |
|                           | vector                      | <i>Ade4</i> R328K           |
| sample 1                  | 3,889                       | 3,557                       |
| sample 2                  | 3,664                       | 3,856                       |
| sample 3                  | 3,671                       | 3,834                       |
| sample 4                  | 3,623                       | 3,619                       |
| Mean                      | 3,71                        | 3,72                        |
| SD                        | 0,12                        | 0,15                        |
| Unpaired t-test vs vector |                             | 9,6E-01                     |

L: [GTP] in mM

|                           | Intracellular concentration | Intracellular concentration |
|---------------------------|-----------------------------|-----------------------------|
| Metabolite (mM)           | [GTP]                       | [GTP]                       |
|                           | vector                      | <i>Ade4</i> R328K           |
| sample 1                  | 0,903                       | 0,835                       |
| sample 2                  | 0,896                       | 0,911                       |
| sample 3                  | 0,880                       | 0,934                       |
| sample 4                  | 0,871                       | 0,874                       |
| Mean                      | 0,89                        | 0,89                        |
| SD                        | 0,01                        | 0,04                        |
| Unpaired t-test vs vector |                             | 9,7E-01                     |

M: [ZMP] in mM

|                           | Intracellular concentration | Intracellular concentration |
|---------------------------|-----------------------------|-----------------------------|
| Metabolite (mM)           | [ZMP]                       | [ZMP]                       |
|                           | vector                      | <i>Ade4</i> R328K           |
| sample 1                  | 0,00059                     | 0,01824                     |
| sample 2                  | 0,00047                     | 0,02136                     |
| sample 3                  | 0,00044                     | 0,02918                     |
| sample 4                  | 0,00028                     | 0,02572                     |
| Mean                      | 0,00044                     | 0,02363                     |
| SD                        | 0,00013                     | 0,00481                     |
| Unpaired t-test vs vector |                             | 2,4E-03                     |

N: [Inosine] in mM

|                           | Intracellular concentration | Intracellular concentration |
|---------------------------|-----------------------------|-----------------------------|
| Metabolite (mM)           | [Inosine]                   | [Inosine]                   |
|                           | vector                      | <i>Ade4</i> R328K           |
| sample 1                  | 0,211                       | 7,257                       |
| sample 2                  | 0,186                       | 7,850                       |
| sample 3                  | 0,199                       | 8,622                       |
| sample 4                  | 0,183                       | 8,285                       |
| Mean                      | 0,19                        | 8,00                        |
| SD                        | 0,01                        | 0,59                        |
| Unpaired t-test vs vector |                             | 1,2E-04                     |

## Table S13: Raw data Figure 10

### A: [PRPP] in mM

| Metabolite                 | Peak area | Peak area | Peak area   | Peak area   | Peak area | mM in cells | mM in cells | mM in cells | mM in cells | mM in cells |
|----------------------------|-----------|-----------|-------------|-------------|-----------|-------------|-------------|-------------|-------------|-------------|
| Strain                     | Control   | PRPS1 WT  | PRPS1 V142L | PRPS1 A190V | PRPS2 WT  | Control     | PRPS1 WT    | PRPS1 V142L | PRPS1 A190V | PRPS2 WT    |
| sample 1                   | 0.0011    | 0.0035    | 0.0056      | 0.0039      | 0.0028    | 0.026       | 0.081       | 0.130       | 0.090       | 0.065       |
| sample 2                   | 0.0013    | 0.0038    | 0.0074      | 0.0054      | 0.0027    | 0.030       | 0.088       | 0.172       | 0.125       | 0.063       |
| sample 3                   | 0.0013    | 0.0026    | 0.0061      | 0.0049      | 0.0025    | 0.030       | 0.060       | 0.141       | 0.114       | 0.058       |
| sample 4                   | 0.0012    | 0.0027    | 0.0051      | 0.0042      | 0.0018    | 0.028       | 0.063       | 0.118       | 0.097       | 0.042       |
| Mean                       | 0.0012    | 0.0032    | 0.0061      | 0.0046      | 0.0025    | 0.028       | 0.073       | 0.140       | 0.107       | 0.057       |
| SD                         | 0.0001    | 0.0006    | 0.0010      | 0.0007      | 0.0005    | 0.002       | 0.014       | 0.023       | 0.016       | 0.010       |
| Unpaired t-test vs control |           | 6,5E-03   | 2,1E-03     | 1,9E-03     | 0,01      |             | 6,5E-03     | 2,1E-03     | 1,9E-03     | 0,01        |

### B: [ATP] in mM

| Metabolite                 | Peak area | Peak area | Peak area   | Peak area   | Peak area | mM in cells | mM in cells | mM in cells | mM in cells | mM in cells |
|----------------------------|-----------|-----------|-------------|-------------|-----------|-------------|-------------|-------------|-------------|-------------|
| Strain                     | Control   | PRPS1 WT  | PRPS1 V142L | PRPS1 A190V | PRPS2 WT  | Control     | PRPS1 WT    | PRPS1 V142L | PRPS1 A190V | PRPS2 WT    |
| sample 1                   | 5.250     | 5.487     | 9.080       | 8.749       | 6.660     | 4.48        | 4.68        | 7.74        | 7.46        | 5.68        |
| sample 2                   | 5.820     | 5.865     | 9.240       | 9.650       | 6.730     | 4.96        | 5.00        | 7.88        | 8.23        | 5.74        |
| sample 3                   | 5.357     | 5.537     | 9.329       | 9.435       | 6.630     | 4.57        | 4.72        | 7.96        | 8.05        | 5.85        |
| sample 4                   | 5.712     | 5.996     | 9.388       | 9.633       | 6.497     | 4.87        | 5.11        | 8.01        | 8.21        | 5.54        |
| Mean                       | 5.53      | 5.72      | 9.26        | 9.37        | 6.63      | 4.72        | 4.88        | 7.90        | 7.99        | 5.65        |
| SD                         | 0.27      | 0.25      | 0.13        | 0.42        | 0.10      | 0.23        | 0.21        | 0.11        | 0.36        | 0.08        |
| Unpaired t-test vs control |           | 0,35      | 7,9E-06     | 1,8E-05     | 2,2E-03   |             | 0,35        | 7,9E-06     | 1,8E-05     | 2,2E-03     |

### C: [GTP] in mM

| Metabolite                 | Peak area | Peak area | Peak area   | Peak area   | Peak area | mM in cells | mM in cells | mM in cells | mM in cells | mM in cells |
|----------------------------|-----------|-----------|-------------|-------------|-----------|-------------|-------------|-------------|-------------|-------------|
| Strain                     | Control   | PRPS1 WT  | PRPS1 V142L | PRPS1 A190V | PRPS2 WT  | Control     | PRPS1 WT    | PRPS1 V142L | PRPS1 A190V | PRPS2 WT    |
| sample 1                   | 0.716     | 0.698     | 1.366       | 1.288       | 0.833     | 0.83        | 0.81        | 1.58        | 1.49        | 0.96        |
| sample 2                   | 0.638     | 0.702     | 1.420       | 1.395       | 0.848     | 0.74        | 0.81        | 1.64        | 1.62        | 0.98        |
| sample 3                   | 0.679     | 0.762     | 1.421       | 1.345       | 0.841     | 0.79        | 0.88        | 1.65        | 1.56        | 0.97        |
| sample 4                   | 0.714     | 0.687     | 1.428       | 1.361       | 0.822     | 0.83        | 0.80        | 1.65        | 1.58        | 0.95        |
| Mean                       | 0.69      | 0.71      | 1.41        | 1.35        | 0.84      | 0.80        | 0.82        | 1.63        | 1.56        | 0.97        |
| SD                         | 0.04      | 0.03      | 0.03        | 0.04        | 0.01      | 0.04        | 0.04        | 0.03        | 0.05        | 0.01        |
| Unpaired t-test vs control |           | 3,5E-01   | 1,5E-07     | 7,0E-07     | 2,4E-03   |             | 3,5E-01     | 1,5E-07     | 7,0E-07     | 2,4E-03     |

### D: [UTP] in mM

| Metabolite                 | Peak area | Peak area | Peak area   | Peak area   | Peak area | mM in cells | mM in cells | mM in cells | mM in cells | mM in cells |
|----------------------------|-----------|-----------|-------------|-------------|-----------|-------------|-------------|-------------|-------------|-------------|
| Strain                     | Control   | PRPS1 WT  | PRPS1 V142L | PRPS1 A190V | PRPS2 WT  | Control     | PRPS1 WT    | PRPS1 V142L | PRPS1 A190V | PRPS2 WT    |
| sample 1                   | 0.6746    | 0.6628    | 1.3801      | 1.2011      | 0.8751    | 1.19        | 1.16        | 2.43        | 2.11        | 1.54        |
| sample 2                   | 0.6142    | 0.6725    | 1.4262      | 1.3295      | 0.8663    | 1.08        | 1.18        | 2.51        | 2.34        | 1.52        |
| sample 3                   | 0.6203    | 0.7168    | 1.4325      | 1.2780      | 0.8759    | 1.09        | 1.26        | 2.52        | 2.25        | 1.54        |
| sample 4                   | 0.6580    | 0.7145    | 1.4818      | 1.3214      | 0.8476    | 1.16        | 1.26        | 2.60        | 2.32        | 1.49        |
| Mean                       | 0.64      | 0.69      | 1.43        | 1.28        | 0.87      | 1.13        | 1.22        | 2.51        | 2.25        | 1.52        |
| SD                         | 0.03      | 0.03      | 0.04        | 0.06        | 0.01      | 0.05        | 0.05        | 0.07        | 0.10        | 0.02        |
| Unpaired t-test vs control |           | 0,05      | 2,8E-07     | 1,9E-05     | 1,2E-04   |             | 0,05        | 2,8E-07     | 1,9E-05     | 1,2E-04     |

### E: [CTP] in mM

| Metabolite                 | Peak area | Peak area | Peak area   | Peak area   | Peak area | mM in cells | mM in cells | mM in cells | mM in cells | mM in cells |
|----------------------------|-----------|-----------|-------------|-------------|-----------|-------------|-------------|-------------|-------------|-------------|
| Strain                     | Control   | PRPS1 WT  | PRPS1 V142L | PRPS1 A190V | PRPS2 WT  | Control     | PRPS1 WT    | PRPS1 V142L | PRPS1 A190V | PRPS2 WT    |
| sample 1                   | 0.3081    | 0.3101    | 0.6045      | 0.5360      | 0.4052    | 0.60        | 0.61        | 1.18        | 1.05        | 0.79        |
| sample 2                   | 0.2803    | 0.3202    | 0.6372      | 0.5904      | 0.4051    | 0.55        | 0.63        | 1.24        | 1.15        | 0.79        |
| sample 3                   | 0.2888    | 0.3327    | 0.6358      | 0.5715      | 0.4033    | 0.56        | 0.65        | 1.24        | 1.12        | 0.79        |
| sample 4                   | 0.3084    | 0.3347    | 0.6383      | 0.5908      | 0.3844    | 0.60        | 0.65        | 1.25        | 1.15        | 0.75        |
| Mean                       | 0.30      | 0.32      | 0.63        | 0.57        | 0.40      | 0.58        | 0.63        | 1.23        | 1.12        | 0.78        |
| SD                         | 0.01      | 0.01      | 0.02        | 0.03        | 0.01      | 0.03        | 0.02        | 0.03        | 0.05        | 0.02        |
| Unpaired t-test vs control |           | 0,02      | 1,0E-07     | 1,4E-05     | 4,3E-05   |             | 0,02        | 1,0E-07     | 1,4E-05     | 4,3E-05     |

### F: [NAD(H)] in mM

| Metabolite                 | $\mu\text{M}$ in sample | $\mu\text{M}$ in sample | $\mu\text{M}$ in sample | $\mu\text{M}$ in sample | $\mu\text{M}$ in sample | mM in cells | mM in cells | mM in cells | mM in cells | mM in cells |
|----------------------------|-------------------------|-------------------------|-------------------------|-------------------------|-------------------------|-------------|-------------|-------------|-------------|-------------|
| Strain                     | Control                 | PRPS1 WT                | PRPS1 V142L             | PRPS1 A190V             | PRPS2 WT                | Control     | PRPS1 WT    | PRPS1 V142L | PRPS1 A190V | PRPS2 WT    |
| sample 1                   | 6.3536                  | 5.2928                  | 7.5551                  | 7.8023                  | 7.5133                  | 2.21        | 1.84        | 2.63        | 2.71        | 2.61        |
| sample 2                   | 5.6084                  | 5.4943                  | 6.9772                  | 7.9049                  | 6.7833                  | 1.95        | 1.91        | 2.43        | 2.75        | 2.36        |
| sample 3                   | 5.6958                  | 5.9810                  | 6.9392                  | 8.0038                  | 6.8289                  | 1.98        | 2.08        | 2.41        | 2.78        | 2.38        |
| sample 4                   | 6.1217                  | 5.5475                  | 7.5475                  | 8.2510                  | 7.1027                  | 2.13        | 1.93        | 2.63        | 2.87        | 2.47        |
| Mean                       | 5.94                    | 5.58                    | 7.25                    | 7.99                    | 7.06                    | 2.07        | 1.94        | 2.52        | 2.78        | 2.46        |
| SD                         | 0.35                    | 0.29                    | 0.34                    | 0.19                    | 0.34                    | 0.12        | 0.10        | 0.12        | 0.07        | 0.12        |
| Unpaired t-test vs control |                         | 1,6E-01                 | 1,8E-03                 | 2,4E-04                 | 3,8E-03                 |             | 1,6E-01     | 1,8E-03     | 2,4E-04     | 3,8E-03     |

### G: Cell proliferation

|                            | Cells/cm <sup>2</sup> | Cells/cm <sup>2</sup> | Cells/cm <sup>2</sup> | Cells/cm <sup>2</sup> | Cells/cm <sup>2</sup> |
|----------------------------|-----------------------|-----------------------|-----------------------|-----------------------|-----------------------|
|                            | x10-3                 | x10-3                 | x10-3                 | x10-3                 | x10-3                 |
| Strain                     | Control               | PRPS1 WT              | PRPS1 V142L           | PRPS1 A190V           | PRPS2 WT              |
| Strain 1                   | 78.4                  | 61.9                  | 54.5                  | 46.5                  | 33.4                  |
| Strain 2                   | 78.7                  | 59.1                  | 48.0                  | 45.8                  | 37.3                  |
| Strain 3                   | 73.4                  | 57.1                  | 49.1                  | 44.8                  | 39.1                  |
| Unpaired t-test vs control |                       | 1,3E-03               | 7,6E-04               | 1,1E-03               | 6,6E-05               |

## Table S14: Raw data Figure 11

### HCT116

#### A: [ATP] in mM

|                            | Peak area | Peak area | mM in cells | mM in cells |
|----------------------------|-----------|-----------|-------------|-------------|
| Metabolite                 | ATP       | ATP       | ATP         | ATP         |
| Extracellular Purine       | None      | Adenine   | None        | Adenine     |
| sample 1                   | 60,12     | 97,43     | 3,00        | 4,87        |
| sample 2                   | 67,33     | 101,23    | 3,36        | 5,06        |
| sample 3                   | 66,13     | 99,63     | 3,30        | 4,95        |
| Mean                       | 64,53     | 99,43     | 3,22        | 4,97        |
| SD                         | 3,87      | 1,91      | 0,19        | 0,10        |
| Unpaired t-test vs control |           | 9,0E-04   |             | 9,0E-04     |

#### B: GTP relative content

|                            | Peak area | Peak area | mM in cells | mM in cells |
|----------------------------|-----------|-----------|-------------|-------------|
| Metabolite                 | GTP       | GTP       | GTP         | GTP         |
| Extracellular Purine       | None      | Adenine   | None        | Adenine     |
| sample 1                   | 5,48      | 3,43      | 0,37        | 0,24        |
| sample 2                   | 6,37      | 3,48      | 0,43        | 0,24        |
| sample 3                   | 6,07      | 3,51      | 0,41        | 0,25        |
| Mean                       | 5,97      | 3,47      | 0,40        | 0,24        |
| SD                         | 0,45      | 0,04      | 0,03        | 0,01        |
| Unpaired t-test vs control |           | 9,9E-03   |             | 9,9E-03     |

#### C: UTP relative content

|                            | Peak area | Peak area | mM in cells | mM in cells |
|----------------------------|-----------|-----------|-------------|-------------|
| Metabolite                 | UTP       | UTP       | UTP         | UTP         |
| Extracellular Purine       | None      | Adenine   | None        | Adenine     |
| sample 1                   | 9,48      | 6,29      | 0,98        | 0,67        |
| sample 2                   | 10,54     | 7,84      | 1,09        | 0,84        |
| sample 3                   | 10,52     | 6,47      | 1,08        | 0,69        |
| Mean                       | 10,18     | 6,87      | 1,05        | 0,73        |
| SD                         | 0,61      | 0,85      | 0,06        | 0,09        |
| Unpaired t-test vs control |           | 0,01      |             | 0,01        |

#### D: CTP relative content

|                            | Peak area | Peak area | mM in cells | mM in cells |
|----------------------------|-----------|-----------|-------------|-------------|
| Metabolite                 | CTP       | CTP       | CTP         | CTP         |
| Extracellular Purine       | None      | Adenine   | None        | Adenine     |
| sample 1                   | 2,70      | 1,79      | 0,31        | 0,21        |
| sample 2                   | 3,06      | 1,84      | 0,35        | 0,22        |
| sample 3                   | 2,85      | 1,82      | 0,33        | 0,22        |
| Mean                       | 2,87      | 1,82      | 0,33        | 0,22        |
| SD                         | 0,18      | 0,03      | 0,02        | 0,01        |
| Unpaired t-test vs control |           | 6,6E-03   |             | 6,6E-03     |

### U-87 MG

#### E: ATP relative content

|                            | Peak area | Peak area | mM in cells | mM in cells |
|----------------------------|-----------|-----------|-------------|-------------|
| Metabolite                 | ATP       | ATP       | ATP         | ATP         |
| Extracellular Purine       | None      | Adenine   | None        | Adenine     |
| sample 1                   | 30,09     | 43,10     | 3,95        | 5,66        |
| sample 2                   | 35,23     | 47,62     | 4,63        | 6,25        |
| sample 3                   | 29,49     | 41,75     | 3,87        | 5,48        |
| sample 4                   | 32,35     | 46,56     | 4,25        | 6,11        |
| sample 5                   | 34,08     | 47,82     | 4,48        | 6,28        |
| Mean                       | 32,25     | 45,37     | 4,24        | 5,96        |
| SD                         | 2,48      | 2,77      | 0,33        | 0,36        |
| Unpaired t-test vs control |           | 5,2E-05   |             | 5,2E-05     |

#### F: GTP relative content

|                            | Peak area | Peak area | content | content |
|----------------------------|-----------|-----------|---------|---------|
| Metabolite                 | GTP       | GTP       | GTP     | GTP     |
| Extracellular Purine       | None      | Adenine   | None    | Adenine |
| sample 1                   | 4,90      | 4,23      | 1,03    | 0,89    |
| sample 2                   | 5,12      | 4,42      | 1,07    | 0,93    |
| sample 3                   | 4,04      | 3,79      | 0,85    | 0,79    |
| sample 4                   | 4,59      | 4,25      | 0,96    | 0,89    |
| sample 5                   | 5,24      | 4,28      | 1,10    | 0,90    |
| Mean                       | 4,78      | 4,19      | 1,00    | 0,88    |
| SD                         | 0,48      | 0,24      | 0,10    | 0,05    |
| Unpaired t-test vs control |           | 0,05      |         | 0,05    |

#### G: UTP relative content

|                            | Peak area | Peak area | content | content |
|----------------------------|-----------|-----------|---------|---------|
| Metabolite                 | UTP       | UTP       | UTP     | UTP     |
| Extracellular Purine       | None      | Adenine   | None    | Adenine |
| sample 1                   | 2,95      | 1,58      | 0,79    | 0,42    |
| sample 2                   | 4,06      | 2,12      | 1,09    | 0,57    |
| sample 3                   | 3,48      | 1,93      | 0,93    | 0,52    |
| sample 4                   | 3,93      | 2,24      | 1,05    | 0,60    |
| sample 5                   | 4,28      | 2,25      | 1,14    | 0,60    |
| Mean                       | 3,74      | 2,02      | 1,00    | 0,54    |
| SD                         | 0,53      | 0,28      | 0,14    | 0,07    |
| Unpaired t-test vs control |           | 6,4E-04   |         | 6,4E-04 |

#### H: CTP relative content

|                            | Peak area | Peak area | mM in cells | mM in cells |
|----------------------------|-----------|-----------|-------------|-------------|
| Metabolite                 | CTP       | CTP       | CTP         | CTP         |
| Extracellular Purine       | None      | Adenine   | None        | Adenine     |
| sample 1                   | 1,35      | 0,80      | 0,90        | 0,53        |
| sample 2                   | 1,60      | 0,90      | 1,06        | 0,60        |
| sample 3                   | 1,36      | 0,80      | 0,90        | 0,53        |
| sample 4                   | 1,52      | 0,88      | 1,01        | 0,59        |
| sample 5                   | 1,69      | 0,89      | 1,12        | 0,59        |
| Mean                       | 1,50      | 0,85      | 1,00        | 0,57        |
| SD                         | 0,15      | 0,05      | 0,10        | 0,03        |
| Unpaired t-test vs control |           | 2,6E-04   |             | 2,6E-04     |

## Table S15: Raw data Figure S1 (Part 1/3)

### A: [ATP] in mM

|                                     | $\mu\text{M}$ in extract | $\mu\text{M}$ in extract | $\mu\text{M}$ in extract | mM       | mM               | mM                    |
|-------------------------------------|--------------------------|--------------------------|--------------------------|----------|------------------|-----------------------|
| Metabolite                          | ATP                      | ATP                      | ATP                      | in cells | in cells         | in cells              |
| Strain                              | WT                       | <i>prs1 prs3</i>         | <i>prs2 prs4 prs5</i>    | WT       | <i>prs1 prs3</i> | <i>prs2 prs4 prs5</i> |
| sample 1                            | 118.48                   | 49.71                    | 97.25                    | 3.55     | 1.49             | 2.92                  |
| sample 2                            | 117.40                   | 47.30                    | 96.23                    | 3.52     | 1.42             | 2.89                  |
| sample 3                            | 116.72                   | 54.60                    | 106.28                   | 3.50     | 1.63             | 3.19                  |
| sample 4                            | 121.18                   | 55.48                    | 96.35                    | 3.64     | 1.66             | 2.89                  |
| sample 5                            | 123.87                   | 57.21                    | 103.25                   | 3.72     | 1.72             | 3.10                  |
| sample 6                            | 121.42                   | 52.97                    | 103.75                   | 3.64     | 1.59             | 3.11                  |
| sample 7                            | 125.24                   | 57.51                    | 102.18                   | 3.76     | 1.73             | 3.07                  |
| sample 8                            | 126.49                   | 54.25                    | 102.28                   | 3.79     | 1.63             | 3.07                  |
| sample 9                            | 126.11                   | 58.67                    | 103.38                   | 3.78     | 1.77             | 3.10                  |
| sample 10                           | 121.90                   | 56.09                    | 100.27                   | 3.66     | 1.68             | 3.01                  |
| Mean                                | 121.88                   | 54.39                    | 101.12                   | 3.66     | 1.63             | 3.03                  |
| SD                                  | 3.55                     | 3.59                     | 3.46                     | 0.11     | 0.11             | 0.10                  |
| Unpaired t-test vs WT               |                          | 1.8E-19                  | 1.0E-10                  |          | 1.8E-19          | 1.0E-10               |
| Unpaired t-test vs <i>prs1 prs3</i> | 1.8E-19                  |                          | 1.0E-16                  | 1.8E-19  |                  | 1.0E-16               |

### B: [GTP] in mM

|                                     | $\mu\text{M}$ in extract | $\mu\text{M}$ in extract | $\mu\text{M}$ in extract | mM       | mM               | mM                    |
|-------------------------------------|--------------------------|--------------------------|--------------------------|----------|------------------|-----------------------|
| Metabolite                          | GTP                      | GTP                      | GTP                      | in cells | in cells         | in cells              |
| Strain                              | WT                       | <i>prs1 prs3</i>         | <i>prs2 prs4 prs5</i>    | WT       | <i>prs1 prs3</i> | <i>prs2 prs4 prs5</i> |
| sample 1                            | 30.892                   | 5.732                    | 22.304                   | 0.93     | 0.17             | 0.67                  |
| sample 2                            | 31.656                   | 5.599                    | 21.904                   | 0.95     | 0.17             | 0.66                  |
| sample 3                            | 31.270                   | 6.075                    | 23.973                   | 0.94     | 0.18             | 0.72                  |
| sample 4                            | 31.391                   | 6.595                    | 21.800                   | 0.94     | 0.20             | 0.65                  |
| sample 5                            | 32.874                   | 6.186                    | 23.476                   | 0.99     | 0.19             | 0.70                  |
| sample 6                            | 32.874                   | 6.063                    | 22.830                   | 0.99     | 0.18             | 0.68                  |
| sample 7                            | 34.583                   | 6.933                    | 22.949                   | 1.04     | 0.21             | 0.69                  |
| sample 8                            | 33.254                   | 6.998                    | 23.461                   | 1.00     | 0.21             | 0.70                  |
| sample 9                            | 33.231                   | 6.717                    | 23.466                   | 1.00     | 0.20             | 0.70                  |
| sample 10                           | 32.854                   | 6.476                    | 23.650                   | 0.99     | 0.19             | 0.71                  |
| Mean                                | 32.488                   | 6.337                    | 22.981                   | 0.97     | 0.19             | 0.69                  |
| SD                                  | 1.149                    | 0.483                    | 0.759                    | 0.03     | 0.01             | 0.02                  |
| Unpaired t-test vs WT               |                          | 7.4E-17                  | 4.1E-13                  |          | 7.4E-17          | 4.1E-13               |
| Unpaired t-test vs <i>prs1 prs3</i> | 7.4E-17                  |                          | 2.2E-19                  | 7.4E-17  |                  | 2.2E-19               |

### C: [UTP] in mM

|                                     | $\mu\text{M}$ in extract | $\mu\text{M}$ in extract | $\mu\text{M}$ in extract | mM       | mM               | mM                    |
|-------------------------------------|--------------------------|--------------------------|--------------------------|----------|------------------|-----------------------|
| Metabolite                          | UTP                      | UTP                      | UTP                      | in cells | in cells         | in cells              |
| Strain                              | WT                       | <i>prs1 prs3</i>         | <i>prs2 prs4 prs5</i>    | WT       | <i>prs1 prs3</i> | <i>prs2 prs4 prs5</i> |
| sample 1                            | 37.980                   | 14.949                   | 34.040                   | 1.14     | 0.45             | 1.02                  |
| sample 2                            | 38.081                   | 13.778                   | 34.232                   | 1.14     | 0.41             | 1.03                  |
| sample 3                            | 37.768                   | 14.461                   | 36.399                   | 1.13     | 0.43             | 1.09                  |
| sample 4                            | 40.475                   | 15.301                   | 33.355                   | 1.21     | 0.46             | 1.00                  |
| sample 5                            | 39.535                   | 14.727                   | 35.860                   | 1.19     | 0.44             | 1.08                  |
| sample 6                            | 39.596                   | 15.117                   | 34.542                   | 1.19     | 0.45             | 1.04                  |
| sample 7                            | 42.230                   | 16.486                   | 36.031                   | 1.27     | 0.49             | 1.08                  |
| sample 8                            | 38.794                   | 15.539                   | 36.498                   | 1.16     | 0.47             | 1.09                  |
| sample 9                            | 40.037                   | 16.225                   | 36.253                   | 1.20     | 0.49             | 1.09                  |
| sample 10                           | 39.974                   | 16.014                   | 34.871                   | 1.20     | 0.48             | 1.05                  |
| Mean                                | 39.447                   | 15.260                   | 35.208                   | 1.18     | 0.46             | 1.06                  |
| SD                                  | 1.363                    | 0.838                    | 1.134                    | 0.04     | 0.03             | 0.03                  |
| Unpaired t-test vs WT               |                          | 9.1E-18                  | 6.7E-07                  |          | 9.1E-18          | 6.7E-07               |
| Unpaired t-test vs <i>prs1 prs3</i> | 9.1E-18                  |                          | 1.0E-18                  | 9.1E-18  |                  | 1.0E-18               |

### D: [CTP] in mM

|                                     | $\mu\text{M}$ in extract | $\mu\text{M}$ in extract | $\mu\text{M}$ in extract | mM       | mM               | mM                    |
|-------------------------------------|--------------------------|--------------------------|--------------------------|----------|------------------|-----------------------|
| Metabolite                          | CTP                      | CTP                      | CTP                      | in cells | in cells         | in cells              |
| Strain                              | WT                       | <i>prs1 prs3</i>         | <i>prs2 prs4 prs5</i>    | WT       | <i>prs1 prs3</i> | <i>prs2 prs4 prs5</i> |
| sample 1                            | 22.458                   | 8.082                    | 18.425                   | 0.67     | 0.24             | 0.55                  |
| sample 2                            | 22.597                   | 7.789                    | 18.437                   | 0.68     | 0.23             | 0.55                  |
| sample 3                            | 22.276                   | 8.895                    | 19.930                   | 0.67     | 0.27             | 0.60                  |
| sample 4                            | 24.490                   | 9.957                    | 19.915                   | 0.73     | 0.30             | 0.60                  |
| sample 5                            | 24.305                   | 9.115                    | 19.974                   | 0.73     | 0.27             | 0.60                  |
| sample 6                            | 23.910                   | 8.928                    | 18.816                   | 0.72     | 0.27             | 0.56                  |
| sample 7                            | 24.795                   | 9.891                    | 19.299                   | 0.74     | 0.30             | 0.58                  |
| sample 8                            | 23.423                   | 9.203                    | 19.240                   | 0.70     | 0.28             | 0.58                  |
| sample 9                            | 24.558                   | 9.851                    | 19.750                   | 0.74     | 0.30             | 0.59                  |
| sample 10                           | 24.391                   | 9.544                    | 18.332                   | 0.73     | 0.29             | 0.55                  |
| Mean                                | 23.720                   | 9.125                    | 19.212                   | 0.71     | 0.27             | 0.58                  |
| SD                                  | 0.961                    | 0.742                    | 0.670                    | 0.03     | 0.02             | 0.02                  |
| Unpaired t-test vs WT               |                          | 7.9E-18                  | 1.6E-09                  |          | 7.9E-18          | 1.6E-09               |
| Unpaired t-test vs <i>prs1 prs3</i> | 7.9E-18                  |                          | 3.6E-17                  | 7.9E-18  |                  | 3.6E-17               |

### E: [ADP] in mM

|                                     | $\mu\text{M}$ in extract | $\mu\text{M}$ in extract | $\mu\text{M}$ in extract | mM       | mM               | mM                    |
|-------------------------------------|--------------------------|--------------------------|--------------------------|----------|------------------|-----------------------|
| Metabolite                          | ADP                      | ADP                      | ADP                      | in cells | in cells         | in cells              |
| Strain                              | WT                       | <i>prs1 prs3</i>         | <i>prs2 prs4 prs5</i>    | WT       | <i>prs1 prs3</i> | <i>prs2 prs4 prs5</i> |
| sample 1                            | 12.77                    | 10.26                    | 11.92                    | 0.38     | 0.31             | 0.36                  |
| sample 2                            | 11.92                    | 9.96                     | 13.12                    | 0.36     | 0.30             | 0.39                  |
| sample 3                            | 12.57                    | 10.87                    | 12.21                    | 0.38     | 0.33             | 0.37                  |
| sample 4                            | 12.97                    | 11.32                    | 12.20                    | 0.39     | 0.34             | 0.37                  |
| sample 5                            | 13.75                    | 11.68                    | 13.75                    | 0.41     | 0.35             | 0.41                  |
| sample 6                            | 14.27                    | 11.86                    | 12.74                    | 0.43     | 0.36             | 0.38                  |
| sample 7                            | 14.58                    | 11.89                    | 12.52                    | 0.44     | 0.36             | 0.38                  |
| sample 8                            | 14.51                    | 11.63                    | 13.61                    | 0.44     | 0.35             | 0.41                  |
| sample 9                            | 14.11                    | 11.72                    | 14.22                    | 0.42     | 0.35             | 0.43                  |
| sample 10                           | 13.33                    | 11.36                    | 13.89                    | 0.40     | 0.34             | 0.42                  |
| Mean                                | 13.478                   | 11.255                   | 13.019                   | 0.40     | 0.34             | 0.39                  |
| SD                                  | 0.908                    | 0.679                    | 0.814                    | 0.03     | 0.02             | 0.02                  |
| Unpaired t-test vs WT               |                          | 1.1E-05                  | 2.5E-01                  |          | 1.1E-05          | 2.5E-01               |
| Unpaired t-test vs <i>prs1 prs3</i> | 1.1E-05                  |                          | 5.9E-05                  | 1.1E-05  |                  | 5.9E-05               |

## Table S15: Raw data Figure S1 (Part 2/3)

### F: [GDP] in mM

|                                     | $\mu\text{M}$ in extract | $\mu\text{M}$ in extract | $\mu\text{M}$ in extract | mM       | mM               | mM                    |
|-------------------------------------|--------------------------|--------------------------|--------------------------|----------|------------------|-----------------------|
| Metabolite                          | GDP                      | GDP                      | GDP                      | in cells | in cells         | in cells              |
| Strain                              | WT                       | <i>prs1 prs3</i>         | <i>prs2 prs4 prs5</i>    | WT       | <i>prs1 prs3</i> | <i>prs2 prs4 prs5</i> |
| sample 1                            | 5.744                    | 2.318                    | 4.827                    | 0.172    | 0.070            | 0.145                 |
| sample 2                            | 5.301                    | 2.224                    | 4.758                    | 0.159    | 0.067            | 0.143                 |
| sample 3                            | 5.535                    | 2.509                    | 4.921                    | 0.166    | 0.075            | 0.148                 |
| sample 4                            | 5.441                    | 2.362                    | 4.066                    | 0.163    | 0.071            | 0.122                 |
| sample 5                            | 5.751                    | 2.270                    | 4.962                    | 0.173    | 0.068            | 0.149                 |
| sample 6                            | 5.343                    | 2.330                    | 4.615                    | 0.160    | 0.070            | 0.138                 |
| sample 7                            | 5.458                    | 2.833                    | 4.532                    | 0.164    | 0.085            | 0.136                 |
| sample 8                            | 5.325                    | 2.398                    | 4.657                    | 0.160    | 0.072            | 0.140                 |
| sample 9                            | 5.753                    | 2.408                    | 4.970                    | 0.173    | 0.072            | 0.149                 |
| sample 10                           | 5.403                    | 2.515                    | 4.784                    | 0.162    | 0.075            | 0.144                 |
| Mean                                | 5.505                    | 2.417                    | 4.709                    | 0.165    | 0.072            | 0.141                 |
| SD                                  | 0.182                    | 0.173                    | 0.270                    | 0.005    | 0.005            | 0.008                 |
| Unpaired t-test vs WT               |                          | 8,6E-19                  | 9,3E-07                  |          | 8,6E-19          | 9,3E-07               |
| Unpaired t-test vs <i>prs1 prs3</i> | 8,6E-19                  |                          | 3,3E-13                  | 8,6E-19  |                  | 3,3E-13               |

### G: [UDP] in mM

|                                     | $\mu\text{M}$ in extract | $\mu\text{M}$ in extract | $\mu\text{M}$ in extract | mM       | mM               | mM                    |
|-------------------------------------|--------------------------|--------------------------|--------------------------|----------|------------------|-----------------------|
| Metabolite                          | UDP                      | UDP                      | UDP                      | in cells | in cells         | in cells              |
| Strain                              | WT                       | <i>prs1 prs3</i>         | <i>prs2 prs4 prs5</i>    | WT       | <i>prs1 prs3</i> | <i>prs2 prs4 prs5</i> |
| sample 1                            | 2.261                    | 2.856                    | 2.036                    | 0.068    | 0.086            | 0.061                 |
| sample 2                            | 1.972                    | 2.649                    | 1.824                    | 0.059    | 0.079            | 0.055                 |
| sample 3                            | 1.841                    | 2.322                    | 1.905                    | 0.055    | 0.070            | 0.057                 |
| sample 4                            | 2.655                    | 3.053                    | 1.634                    | 0.080    | 0.092            | 0.049                 |
| sample 5                            | 2.662                    | 3.159                    | 2.140                    | 0.080    | 0.095            | 0.064                 |
| sample 6                            | 2.387                    | 2.780                    | 1.481                    | 0.072    | 0.083            | 0.044                 |
| sample 7                            | 2.815                    | 2.864                    | 1.980                    | 0.084    | 0.086            | 0.059                 |
| sample 8                            | 2.866                    | 2.720                    | 1.937                    | 0.086    | 0.082            | 0.058                 |
| sample 9                            | 2.431                    | 3.033                    | 1.723                    | 0.073    | 0.091            | 0.052                 |
| sample 10                           | 2.493                    | 2.789                    | 1.899                    | 0.075    | 0.084            | 0.057                 |
| Mean                                | 2.438                    | 2.823                    | 1.856                    | 0.073    | 0.085            | 0.056                 |
| SD                                  | 0.339                    | 0.237                    | 0.197                    | 0.010    | 0.007            | 0.006                 |
| Unpaired t-test vs WT               |                          | 9,6E-03                  | 3,1E-04                  |          | 9,6E-03          | 3,1E-04               |
| Unpaired t-test vs <i>prs1 prs3</i> | 9,6E-03                  |                          | 1,4E-08                  | 9,6E-03  |                  | 1,4E-08               |

### H: [CDP] in mM

|                                     | $\mu\text{M}$ in extract | $\mu\text{M}$ in extract | $\mu\text{M}$ in extract | mM       | mM               | mM                    |
|-------------------------------------|--------------------------|--------------------------|--------------------------|----------|------------------|-----------------------|
| Metabolite                          | CDP                      | CDP                      | CDP                      | in cells | in cells         | in cells              |
| Strain                              | WT                       | <i>prs1 prs3</i>         | <i>prs2 prs4 prs5</i>    | WT       | <i>prs1 prs3</i> | <i>prs2 prs4 prs5</i> |
| sample 1                            | 1.182                    | 0.815                    | 0.863                    | 0.035    | 0.024            | 0.026                 |
| sample 2                            | 1.211                    | 0.820                    | 0.983                    | 0.036    | 0.025            | 0.029                 |
| sample 3                            | 1.132                    | 0.717                    | 1.019                    | 0.034    | 0.021            | 0.031                 |
| sample 4                            | 1.287                    | 0.766                    | 0.867                    | 0.039    | 0.023            | 0.026                 |
| sample 5                            | 1.223                    | 0.698                    | 0.920                    | 0.037    | 0.021            | 0.028                 |
| sample 6                            | 1.163                    | 0.746                    | 0.833                    | 0.035    | 0.022            | 0.025                 |
| sample 7                            | 1.155                    | 0.737                    | 0.906                    | 0.035    | 0.022            | 0.027                 |
| sample 8                            | 1.372                    | 0.735                    | 1.019                    | 0.041    | 0.022            | 0.031                 |
| sample 9                            | 1.133                    | 0.824                    | 0.950                    | 0.034    | 0.025            | 0.028                 |
| sample 10                           | 1.265                    | 0.753                    | 1.071                    | 0.038    | 0.023            | 0.032                 |
| Mean                                | 1.212                    | 0.761                    | 0.943                    | 0.036    | 0.023            | 0.028                 |
| SD                                  | 0.077                    | 0.045                    | 0.079                    | 0.002    | 0.001            | 0.002                 |
| Unpaired t-test vs WT               |                          | 1,3E-10                  | 4,0E-07                  |          | 1,3E-10          | 4,0E-07               |
| Unpaired t-test vs <i>prs1 prs3</i> | 1,3E-10                  |                          | 1,6E-05                  | 1,3E-10  |                  | 1,6E-05               |

### I: [AMP] in mM

|                                     | $\mu\text{M}$ in extract | $\mu\text{M}$ in extract | $\mu\text{M}$ in extract | mM       | mM               | mM                    |
|-------------------------------------|--------------------------|--------------------------|--------------------------|----------|------------------|-----------------------|
| Metabolite                          | AMP                      | AMP                      | AMP                      | in cells | in cells         | in cells              |
| Strain                              | WT                       | <i>prs1 prs3</i>         | <i>prs2 prs4 prs5</i>    | WT       | <i>prs1 prs3</i> | <i>prs2 prs4 prs5</i> |
| sample 1                            | 4.619                    | 3.320                    | 4.217                    | 0.139    | 0.100            | 0.127                 |
| sample 2                            | 4.227                    | 3.456                    | 3.897                    | 0.127    | 0.104            | 0.117                 |
| sample 3                            | 4.624                    | 3.303                    | 4.962                    | 0.139    | 0.099            | 0.149                 |
| sample 4                            | 3.950                    | 3.747                    | 3.947                    | 0.119    | 0.112            | 0.118                 |
| sample 5                            | 4.302                    | 3.654                    | 4.582                    | 0.129    | 0.110            | 0.137                 |
| sample 6                            | 4.516                    | 3.792                    | 4.112                    | 0.135    | 0.114            | 0.123                 |
| sample 7                            | 4.397                    | 3.785                    | 4.428                    | 0.132    | 0.114            | 0.133                 |
| sample 8                            | 4.222                    | 3.647                    | 3.815                    | 0.127    | 0.109            | 0.114                 |
| sample 9                            | 4.299                    | 3.424                    | 4.425                    | 0.129    | 0.103            | 0.133                 |
| sample 10                           | 4.456                    | 3.728                    | 4.284                    | 0.111    | 0.093            | 0.107                 |
| Mean                                | 4.361                    | 3.586                    | 4.267                    | 0.129    | 0.106            | 0.126                 |
| SD                                  | 0.207                    | 0.192                    | 0.350                    | 0.009    | 0.007            | 0.012                 |
| Unpaired t-test vs WT               |                          | 7,6E-08                  | 4,8E-01                  |          | 4,9E-06          | 5,7E-01               |
| Unpaired t-test vs <i>prs1 prs3</i> | 7,6E-08                  |                          | 9,5E-05                  | 4,9E-06  |                  | 5,1E-04               |

### J: [GMP] in mM

|                                     | $\mu\text{M}$ in extract | $\mu\text{M}$ in extract | $\mu\text{M}$ in extract | mM       | mM               | mM                    |
|-------------------------------------|--------------------------|--------------------------|--------------------------|----------|------------------|-----------------------|
| Metabolite                          | GMP                      | GMP                      | GMP                      | in cells | in cells         | in cells              |
| Strain                              | WT                       | <i>prs1 prs3</i>         | <i>prs2 prs4 prs5</i>    | WT       | <i>prs1 prs3</i> | <i>prs2 prs4 prs5</i> |
| sample 1                            | 12.831                   | 2.837                    | 10.141                   | 0.385    | 0.085            | 0.304                 |
| sample 2                            | 12.555                   | 2.908                    | 10.263                   | 0.377    | 0.087            | 0.308                 |
| sample 3                            | 10.503                   | 2.585                    | 10.591                   | 0.315    | 0.078            | 0.318                 |
| sample 4                            | 11.098                   | 2.866                    | 9.832                    | 0.333    | 0.086            | 0.295                 |
| sample 5                            | 12.545                   | 2.908                    | 10.729                   | 0.376    | 0.087            | 0.322                 |
| sample 6                            | 12.538                   | 2.906                    | 10.892                   | 0.376    | 0.087            | 0.327                 |
| sample 7                            | 11.054                   | 3.049                    | 10.117                   | 0.332    | 0.091            | 0.304                 |
| sample 8                            | 11.255                   | 3.014                    | 9.816                    | 0.338    | 0.090            | 0.294                 |
| sample 9                            | 12.461                   | 2.969                    | 10.488                   | 0.374    | 0.089            | 0.315                 |
| sample 10                           | 11.876                   | 2.984                    | 9.541                    | 0.356    | 0.090            | 0.286                 |
| Mean                                | 11.872                   | 2.903                    | 10.241                   | 0.356    | 0.087            | 0.307                 |
| SD                                  | 0.827                    | 0.130                    | 0.436                    | 0.025    | 0.004            | 0.013                 |
| Unpaired t-test vs WT               |                          | 3,5E-11                  | 8,3E-05                  |          | 3,5E-11          | 8,3E-05               |
| Unpaired t-test vs <i>prs1 prs3</i> | 3,5E-11                  |                          | 5,2E-14                  | 3,5E-11  |                  | 5,2E-14               |



### Table S15: Raw data Figure S1 (Part 3/3)

**K: [UMP] in mM**

|                                     | $\mu\text{M}$ in extract | $\mu\text{M}$ in extract | $\mu\text{M}$ in extract | mM       | mM               | mM                    |
|-------------------------------------|--------------------------|--------------------------|--------------------------|----------|------------------|-----------------------|
| Metabolite                          | UMP                      | UMP                      | UMP                      | in cells | in cells         | in cells              |
| Strain                              | WT                       | <i>prs1 prs3</i>         | <i>prs2 prs4 prs5</i>    | WT       | <i>prs1 prs3</i> | <i>prs2 prs4 prs5</i> |
| sample 1                            | 15,799                   | 15,168                   | 12,120                   | 0,474    | 0,455            | 0,364                 |
| sample 2                            | 15,144                   | 15,754                   | 13,760                   | 0,454    | 0,473            | 0,413                 |
| sample 3                            | 15,190                   | 16,945                   | 14,321                   | 0,456    | 0,508            | 0,430                 |
| sample 4                            | 14,553                   | 16,958                   | 12,465                   | 0,437    | 0,509            | 0,374                 |
| sample 5                            | 16,325                   | 17,331                   | 13,373                   | 0,490    | 0,520            | 0,401                 |
| sample 6                            | 16,460                   | 16,376                   | 13,647                   | 0,494    | 0,491            | 0,409                 |
| sample 7                            | 15,355                   | 17,389                   | 12,137                   | 0,461    | 0,522            | 0,364                 |
| sample 8                            | 15,023                   | 16,925                   | 11,718                   | 0,451    | 0,508            | 0,352                 |
| sample 9                            | 16,731                   | 17,874                   | 12,881                   | 0,502    | 0,536            | 0,386                 |
| sample 10                           | 15,825                   | 16,675                   | 11,559                   | 0,475    | 0,500            | 0,347                 |
| Mean                                | 15,641                   | 16,739                   | 12,798                   | 0,469    | 0,502            | 0,384                 |
| SD                                  | 0,706                    | 0,800                    | 0,944                    | 0,021    | 0,024            | 0,028                 |
| Unpaired t-test vs WT               |                          | 4,4E-03                  | 7,9E-07                  |          | 4,4E-03          | 7,9E-07               |
| Unpaired t-test vs <i>prs1 prs3</i> | 4,4E-03                  |                          | 1,0E-08                  | 4,4E-03  |                  | 1,0E-08               |

**L: [CMP] in mM**

|                                     | $\mu\text{M}$ in extract | $\mu\text{M}$ in extract | $\mu\text{M}$ in extract | mM       | mM               | mM                    |
|-------------------------------------|--------------------------|--------------------------|--------------------------|----------|------------------|-----------------------|
| Metabolite                          | CMP                      | CMP                      | CMP                      | in cells | in cells         | in cells              |
| Strain                              | WT                       | <i>prs1 prs3</i>         | <i>prs2 prs4 prs5</i>    | WT       | <i>prs1 prs3</i> | <i>prs2 prs4 prs5</i> |
| sample 1                            | 0,572                    | 0,371                    | 0,434                    | 0,017    | 0,011            | 0,013                 |
| sample 2                            | 0,546                    | 0,391                    | 0,454                    | 0,016    | 0,012            | 0,014                 |
| sample 3                            | 0,511                    | 0,337                    | 0,413                    | 0,015    | 0,010            | 0,012                 |
| sample 4                            | 0,509                    | 0,471                    | 0,404                    | 0,015    | 0,014            | 0,012                 |
| sample 5                            | 0,654                    | 0,449                    | 0,459                    | 0,020    | 0,013            | 0,014                 |
| sample 6                            | 0,496                    | 0,463                    | 0,384                    | 0,015    | 0,014            | 0,012                 |
| sample 7                            | 0,466                    | 0,417                    | 0,461                    | 0,014    | 0,013            | 0,014                 |
| sample 8                            | 0,535                    | 0,402                    | 0,420                    | 0,016    | 0,012            | 0,013                 |
| sample 9                            | 0,461                    | 0,471                    | 0,404                    | 0,014    | 0,014            | 0,012                 |
| sample 10                           | 0,479                    | 0,400                    | 0,384                    | 0,014    | 0,012            | 0,012                 |
| Mean                                | 0,523                    | 0,417                    | 0,422                    | 0,016    | 0,013            | 0,013                 |
| SD                                  | 0,058                    | 0,046                    | 0,029                    | 0,002    | 0,001            | 0,001                 |
| Unpaired t-test vs WT               |                          | 2,9E-04                  | 2,5E-04                  |          | 2,9E-04          | 2,5E-04               |
| Unpaired t-test vs <i>prs1 prs3</i> | 2,9E-04                  |                          | 8,0E-01                  | 2,9E-04  |                  | 8,0E-01               |

## Table S16 Figure S3

### B: [ATP] in mM

|                                        | mM<br>in cells       | mM<br>in cells       | mM<br>in cells        | mM<br>in cells        |
|----------------------------------------|----------------------|----------------------|-----------------------|-----------------------|
| Metabolite (mM)                        | [ATP]                | [ATP]                | [ATP]                 | [ATP]                 |
| Strain                                 | <i>URA2 - uracil</i> | <i>URA2 + uracil</i> | <i>ura2Δ - uracil</i> | <i>ura2Δ + uracil</i> |
| sample 1                               | 3,064                | 3,353                | 3,994                 | 3,072                 |
| sample 2                               | 3,490                | 2,811                | 4,210                 | 2,869                 |
| sample 3                               | 3,020                | 3,036                | 3,820                 | 3,223                 |
| sample 4                               | 3,409                | 3,292                | 4,270                 | 3,527                 |
| Mean                                   | 3,25                 | 3,12                 | 4,07                  | 3,17                  |
| SD                                     | 0,24                 | 0,25                 | 0,21                  | 0,28                  |
| Unpaired t-test vs <i>URA2 -uracil</i> |                      | 0,50                 | 2,0E-03               | 0,70                  |

### C: [GTP] in mM

|                                        | mM<br>in cells       | mM<br>in cells       | mM<br>in cells        | mM<br>in cells        |
|----------------------------------------|----------------------|----------------------|-----------------------|-----------------------|
| Metabolite (mM)                        | [GTP]                | [GTP]                | [GTP]                 | [GTP]                 |
| Strain                                 | <i>URA2 - uracil</i> | <i>URA2 + uracil</i> | <i>ura2Δ - uracil</i> | <i>ura2Δ + uracil</i> |
| sample 1                               | 0,795                | 0,820                | 0,976                 | 0,806                 |
| sample 2                               | 0,797                | 0,738                | 1,063                 | 0,802                 |
| sample 3                               | 0,823                | 0,723                | 0,984                 | 0,870                 |
| sample 4                               | 0,782                | 0,756                | 0,973                 | 0,848                 |
| Mean                                   | 0,80                 | 0,76                 | 1,00                  | 0,83                  |
| SD                                     | 0,02                 | 0,04                 | 0,04                  | 0,03                  |
| Unpaired t-test vs <i>URA2 -uracil</i> |                      | 0,16                 | 1,0E-03               | 0,15                  |

### D: [UTP] in mM

|                                        | mM<br>in cells       | mM<br>in cells       | mM<br>in cells        | mM<br>in cells        |
|----------------------------------------|----------------------|----------------------|-----------------------|-----------------------|
| Metabolite (mM)                        | [UTP]                | [UTP]                | [UTP]                 | [UTP]                 |
| Strain                                 | <i>URA2 - uracil</i> | <i>URA2 + uracil</i> | <i>ura2Δ - uracil</i> | <i>ura2Δ + uracil</i> |
| sample 1                               | 0,709                | 1,025                | 0,010                 | 0,795                 |
| sample 2                               | 0,809                | 0,943                | 0,003                 | 0,813                 |
| sample 3                               | 0,805                | 1,095                | 0,004                 | 0,931                 |
| sample 4                               | 0,880                | 1,126                | 0,015                 | 0,858                 |
| Mean                                   | 0,88                 | 1,13                 | 0,02                  | 0,86                  |
| SD                                     | 0,07                 | 0,08                 | 0,01                  | 0,06                  |
| Unpaired t-test vs <i>URA2 -uracil</i> |                      | 3,9E-03              | 1,7E-04               | 0,34                  |

### E: [CTP] in mM

|                                        | mM<br>in cells       | mM<br>in cells       | mM<br>in cells        | mM<br>in cells        |
|----------------------------------------|----------------------|----------------------|-----------------------|-----------------------|
| Metabolite (mM)                        | [CTP]                | [CTP]                | [CTP]                 | [CTP]                 |
| Strain                                 | <i>URA2 - uracil</i> | <i>URA2 + uracil</i> | <i>ura2Δ - uracil</i> | <i>ura2Δ + uracil</i> |
| sample 1                               | 0,446                | 0,532                | 0,186                 | 0,453                 |
| sample 2                               | 0,442                | 0,477                | 0,226                 | 0,451                 |
| sample 3                               | 0,461                | 0,476                | 0,192                 | 0,466                 |
| sample 4                               | 0,448                | 0,560                | 0,216                 | 0,530                 |
| Mean                                   | 0,88                 | 1,13                 | 0,02                  | 0,86                  |
| SD                                     | 0,01                 | 0,04                 | 0,02                  | 0,04                  |
| Unpaired t-test vs <i>URA2 -uracil</i> |                      | 0,06                 | 1,6E-05               | 0,26                  |

### F: [NAD<sup>+</sup> + NADH] in mM

|                                        | mM<br>in cells       | mM<br>in cells       | mM<br>in cells        | mM<br>in cells        |
|----------------------------------------|----------------------|----------------------|-----------------------|-----------------------|
| Metabolite (mM)                        | [NAD(H)]             | [NAD(H)]             | [NAD(H)]              | [NAD(H)]              |
| Strain                                 | <i>URA2 - uracil</i> | <i>URA2 + uracil</i> | <i>ura2Δ - uracil</i> | <i>ura2Δ + uracil</i> |
| sample 1                               | 2,152                | 2,298                | 2,789                 | 2,377                 |
| sample 2                               | 2,289                | 2,298                | 3,051                 | 2,256                 |
| sample 3                               | 2,290                | 2,316                | 2,852                 | 2,534                 |
| sample 4                               | 2,252                | 2,528                | 2,783                 | 2,355                 |
| Mean                                   | 0,88                 | 1,13                 | 0,02                  | 0,86                  |
| SD                                     | 0,07                 | 0,11                 | 0,13                  | 0,12                  |
| Unpaired t-test vs <i>URA2 -uracil</i> |                      | 0,14                 | 5,2E-04               | 0,10                  |

## Table S17: Raw data Figure S4

### A: [PRPP] in $\mu\text{M}$

| Metabolite                 | Peak area | Peak area | Peak area | Peak area | $\mu\text{M}$ in cells | $\mu\text{M}$ in cells | $\mu\text{M}$ in cells | $\mu\text{M}$ in cells |
|----------------------------|-----------|-----------|-----------|-----------|------------------------|------------------------|------------------------|------------------------|
| Strain                     | PRPP      | PRPP      | PRPP      | PRPP      | PRPP                   | PRPP                   | PRPP                   | PRPP                   |
| sample 1                   | 0.00045   | 0.00040   | 0.00120   | 0.00080   | 6.6651                 | 5.9245                 | 17.7736                | 11.8491                |
| sample 2                   | 0.00032   | 0.00021   | 0.00096   | 0.00085   | 4.7259                 | 3.1506                 | 14.1778                | 12.6025                |
| sample 3                   | 0.00042   | 0.00042   | 0.00084   | 0.00063   | 6.2537                 | 6.2537                 | 12.5073                | 9.3805                 |
| sample 4                   | 0.00026   | 0.00010   | 0.00114   | 0.00073   | 3.8443                 | 1.5377                 | 16.9148                | 10.7639                |
| Mean                       | 0.0004    | 0.0003    | 0.0010    | 0.0008    | 5.3722                 | 4.2166                 | 15.3434                | 11.1490                |
| SD                         | 0.0001    | 0.0002    | 0.0002    | 0.0001    | 1.3167                 | 2.2642                 | 2.4343                 | 1.3998                 |
| Unpaired t-test vs control |           | 0,42      | 1,1E-03   | 9,7E-04   |                        | 0,42                   | 1,1E-03                | 9,7E-04                |

### B: [ATP] in mM

| Metabolite                 | Peak area | Peak area | Peak area | Peak area | mM in cells | mM in cells | mM in cells | mM in cells |
|----------------------------|-----------|-----------|-----------|-----------|-------------|-------------|-------------|-------------|
| Strain                     | ATP       | ATP       | ATP       | ATP       | PRPP        | PRPP        | PRPP        | PRPP        |
| sample 1                   | 6.398     | 6.726     | 9.175     | 10.075    | 3.48        | 3.66        | 5.00        | 5.49        |
| sample 2                   | 6.865     | 7.131     | 9.632     | 10.392    | 3.74        | 3.88        | 5.24        | 5.66        |
| sample 3                   | 6.760     | 7.110     | 9.888     | 10.224    | 3.68        | 3.87        | 5.38        | 5.57        |
| sample 4                   | 6.376     | 6.877     | 9.845     | 9.511     | 3.47        | 3.64        | 5.36        | 5.18        |
| Mean                       | 6.60      | 6.91      | 9.64      | 10.05     | 3.59        | 3.76        | 5.25        | 5.47        |
| SD                         | 0.25      | 0.24      | 0.33      | 0.38      | 0.14        | 0.13        | 0.18        | 0.21        |
| Unpaired t-test vs control |           | 0,12      | 1,0E-05   | 1,8E-05   |             | 0,12        | 1,0E-05     | 1,8E-05     |

### C: [GTP] in mM

| Metabolite                 | Peak area | Peak area | Peak area | Peak area | mM in cells | mM in cells | mM in cells | mM in cells |
|----------------------------|-----------|-----------|-----------|-----------|-------------|-------------|-------------|-------------|
| Strain                     | GTP       | GTP       | GTP       | GTP       | PRPP        | PRPP        | PRPP        | PRPP        |
| sample 1                   | 0.743     | 0.810     | 1.119     | 1.182     | 0.55        | 0.60        | 0.83        | 0.87        |
| sample 2                   | 0.790     | 0.855     | 1.142     | 1.248     | 0.58        | 0.63        | 0.84        | 0.92        |
| sample 3                   | 0.782     | 0.856     | 1.171     | 1.216     | 0.58        | 0.63        | 0.87        | 0.90        |
| sample 4                   | 0.731     | 0.773     | 1.079     | 1.203     | 0.54        | 0.57        | 0.80        | 0.89        |
| Mean                       | 0.76      | 0.82      | 1.13      | 1.21      | 0.56        | 0.61        | 0.83        | 0.90        |
| SD                         | 0.03      | 0.04      | 0.04      | 0.03      | 0.02        | 0.03        | 0.03        | 0.02        |
| Unpaired t-test vs control |           | 0,05      | 1,1E-05   | 4,8E-07   |             | 0,05        | 1,1E-05     | 4,8E-07     |

### D: [UTP] in mM

| Metabolite                 | Peak area | Peak area | Peak area | Peak area | mM in cells | mM in cells | mM in cells | mM in cells |
|----------------------------|-----------|-----------|-----------|-----------|-------------|-------------|-------------|-------------|
| Strain                     | UTP       | UTP       | UTP       | UTP       | PRPP        | PRPP        | PRPP        | PRPP        |
| sample 1                   | 0.788     | 0.773     | 1.557     | 1.435     | 0.88        | 0.87        | 1.75        | 1.61        |
| sample 2                   | 0.813     | 0.846     | 1.432     | 1.463     | 0.91        | 0.95        | 1.61        | 1.64        |
| sample 3                   | 0.825     | 0.850     | 1.461     | 1.442     | 0.93        | 0.95        | 1.64        | 1.62        |
| sample 4                   | 0.773     | 0.852     | 1.468     | 1.324     | 0.87        | 0.96        | 1.65        | 1.49        |
| Mean                       | 0.80      | 0.83      | 1.48      | 1.42      | 0.90        | 0.93        | 1.66        | 1.59        |
| SD                         | 0.02      | 0.04      | 0.05      | 0.06      | 0.03        | 0.04        | 0.06        | 0.07        |
| Unpaired t-test vs control |           | 0,24      | 1,6E-05   | 6,8E-05   |             | 0,24        | 1,6E-05     | 6,8E-05     |

### E: [CTP] in mM

| Metabolite                 | Peak area | Peak area | Peak area | Peak area | mM in cells | mM in cells | mM in cells | mM in cells |
|----------------------------|-----------|-----------|-----------|-----------|-------------|-------------|-------------|-------------|
| Strain                     | CTP       | CTP       | CTP       | CTP       | PRPP        | PRPP        | PRPP        | PRPP        |
| sample 1                   | 0.319     | 0.329     | 0.491     | 0.544     | 0.40        | 0.41        | 0.61        | 0.68        |
| sample 2                   | 0.344     | 0.359     | 0.551     | 0.578     | 0.43        | 0.45        | 0.69        | 0.72        |
| sample 3                   | 0.329     | 0.353     | 0.547     | 0.558     | 0.41        | 0.44        | 0.68        | 0.70        |
| sample 4                   | 0.297     | 0.325     | 0.539     | 0.504     | 0.37        | 0.41        | 0.67        | 0.63        |
| Mean                       | 0.32      | 0.34      | 0.53      | 0.55      | 0.40        | 0.43        | 0.66        | 0.68        |
| SD                         | 0.02      | 0.02      | 0.03      | 0.03      | 0.02        | 0.02        | 0.03        | 0.04        |
| Unpaired t-test vs control |           | 0,19      | 3,7E-05   | 6,5E-05   |             | 0,19        | 3,7E-05     | 6,5E-05     |

### F: [NAD(H)] in mM

| Metabolite                 | $\mu\text{M}$ in sample | $\mu\text{M}$ in sample | $\mu\text{M}$ in sample | $\mu\text{M}$ in sample | mM in cells | mM in cells | mM in cells | mM in cells |
|----------------------------|-------------------------|-------------------------|-------------------------|-------------------------|-------------|-------------|-------------|-------------|
| Strain                     | NAD(H)                  | NAD(H)                  | NAD(H)                  | NAD(H)                  | PRPP        | PRPP        | PRPP        | PRPP        |
| sample 1                   | 1.182                   | 1.192                   | 1.788                   | 1.350                   | 0.263       | 0.265       | 0.397       | 0.300       |
| sample 2                   | 0.998                   | 1.253                   | 1.983                   | 1.399                   | 0.236       | 0.296       | 0.469       | 0.331       |
| sample 3                   | 0.961                   | 1.314                   | 1.667                   | 1.192                   | 0.225       | 0.308       | 0.391       | 0.280       |
| sample 4                   | 1.156                   | 1.010                   | 1.509                   | 1.484                   | 0.267       | 0.233       | 0.348       | 0.342       |
| Mean                       | 1.07                    | 1.19                    | 1.74                    | 1.36                    | 0.248       | 0.275       | 0.401       | 0.313       |
| SD                         | 0.11                    | 0.13                    | 0.20                    | 0.12                    | 0.020       | 0.034       | 0.050       | 0.029       |
| Unpaired t-test vs control |                         | 0,22                    | 4,9E-03                 | 0,01                    |             | 0,22        | 4,9E-03     | 0,01        |

### G: Cell proliferation

|                            | Cell/cm <sup>2</sup> | Cell/cm <sup>2</sup> | Cell/cm <sup>2</sup> | Cell/cm <sup>2</sup> |
|----------------------------|----------------------|----------------------|----------------------|----------------------|
|                            | $\times 10^3$        | $\times 10^3$        | $\times 10^3$        | $\times 10^3$        |
|                            | Control              | PRPS1 WT             | PRPS1 V142L          | PRPS1 A190V          |
| Strain 1                   | 227.1                | 254.5                | 128.3                | 119.1                |
| Strain 2                   | 215.2                | 245.8                | 133.3                | 119.9                |
| Strain 3                   | 216.4                | 244.7                | 123.2                | 106.7                |
| Unpaired t-test vs control |                      | 4,7E-03              | 7,1E-05              | 5,8E-05              |
